# Supplementary material
Source: HighWire-hosted journal article supplement (https://cmajopen-stage.highwire.org/highwire/filestream/81253/field_highwire_adjunct_files/0/2018-0062-1-at.pdf)
Supplement: 2018-0062-1-at.pdf [file 2018-0062-1-at.pdf]

**Appendix 1 (as supplied by the authors): List of the Health and Risk Factor Questionnaire DataSchema variables (Version 2.0 - Oct. 2017)**

| Variable                                                   | label                                                                                         | Description                                                                                                             | Categories                                                                                                                                                                                                                                                                                     |
|------------------------------------------------------------|-----------------------------------------------------------------------------------------------|-------------------------------------------------------------------------------------------------------------------------|------------------------------------------------------------------------------------------------------------------------------------------------------------------------------------------------------------------------------------------------------------------------------------------------|
| <b>Sociodemographic economic characteristics-Ethnicity</b> |                                                                                               |                                                                                                                         |                                                                                                                                                                                                                                                                                                |
| SDC_EB_ABORIGINAL                                          | Participant's ethnic background is Aboriginal (e.g. First Nations, Metis, Inuit).             | Participant has Aboriginal (e.g. First Nations, Metis, Inuit) ethnic background.                                        | 1. Aboriginal (e.g. First Nations, Metis, Inuit)   0. Not aboriginal (e.g. First Nations, Metis, Inuit)                                                                                                                                                                                        |
| SDC_EB_ARAB                                                | Participant's ethnic background is Arab (e.g. Egypt, Iraq, Jordan, Lebanon).                  | Participant has Arab (e.g. Egypt, Iraq, Jordan, Lebanon) ethnic background.                                             | 1. Arab (e.g. Egypt, Iraq, Jordan, Lebanon)   0. Not arab (e.g. Egypt, Iraq, Jordan, Lebanon)                                                                                                                                                                                                  |
| SDC_EB_BLACK                                               | Participant's ethnic background is Black (African or Caribbean descent).                      | Participant has Black (African or Caribbean descent) ethnic background.                                                 | 1. Black (African or Caribbean descent)   0. Not black (African or Caribbean descent)                                                                                                                                                                                                          |
| SDC_EB_E_ASIAN                                             | Participant's ethnic background is East Asian (e.g. China, Japan, Korea, Taiwan).             | Participant has East Asian (e.g. China, Japan, Korea, Taiwan) ethnic background.                                        | 1. East Asian (e.g. China, Japan, Korea, Taiwan)   0. Not East Asian (e.g. China, Japan, Korea, Taiwan)                                                                                                                                                                                        |
| SDC_EB_FILIPINO                                            | Participant's ethnic background is Filipino.                                                  | Participant has Filipino ethnic background.                                                                             | 1. Filipino   0. Not Filipino                                                                                                                                                                                                                                                                  |
| SDC_EB_JEWISH                                              | Participant's ethnic background is Jewish.                                                    | Participant has Jewish ethnic background.                                                                               | 1. Jewish   0. Not Jewish                                                                                                                                                                                                                                                                      |
| SDC_EB_LATIN                                               | Participant's ethnic background is Latin American/Hispanic).                                  | Participant has Latin American/Hispanic ethnic background.                                                              | 1. Latin American/Hispanic   0. Not Latin American/Hispanic                                                                                                                                                                                                                                    |
| SDC_EB_OTHER                                               | Participant has another ethnic background.                                                    | Participant has other ethnic background than those listed.                                                              | 1. Other ethnic group   0. Not Other ethnic group                                                                                                                                                                                                                                              |
| SDC_EB_SE_ASIAN                                            | Participant's ethnic background is Southeast Asian (e.g. Malaysia, Indonesia, Viet Nam).      | Participant has Southeast Asian (e.g. Malaysia, Indonesia, Viet Nam) ethnic background.                                 | 1. Southeast Asian (e.g. Malaysia, Indonesia, Viet Nam)   0. Not Southeast Asian (e.g. Malaysia, Indonesia, Viet Nam)                                                                                                                                                                          |
| SDC_EB_S_ASIAN                                             | Participant's ethnic background is South Asian (e.g. India, Sri Lanka, Pakistan, Bangladesh). | Participant has South Asian (e.g. India, Sri Lanka, Pakistan, Bangladesh) ethnic background.                            | 1. South Asian (e.g. India, Sri Lanka, Pakistan, Bangladesh)   0. Not South Asian (e.g. India, Sri Lanka, Pakistan, Bangladesh)                                                                                                                                                                |
| SDC_EB_WHITE                                               | Participant's ethnic background is White (European descent).                                  | Participant has White (European descent) ethnic background.                                                             | 1. White (European descent)   0. Not White (European descent)                                                                                                                                                                                                                                  |
| SDC_EB_W_ASIAN                                             | Participant's ethnic background is West Asian (e.g. Turkey, Iran, Afghanistan).               | Participant has West Asian (e.g. Turkey, Iran, Afghanistan) ethnic background.                                          | 1. West Asian (e.g. Turkey, Iran, Afghanistan)   0. Not West Asian (e.g. Turkey, Iran, Afghanistan)                                                                                                                                                                                            |
| SDC_EB_CAT                                                 | Participant's ethnic background                                                               | Participant's ethnic background derived from a multiple selection question.                                             | 1. Aboriginal   2. Arab   3. Black (African or Caribbean descent)   4. East Asian   5. Filipino   6. Jewish   7. Latin American/Hispanic   8. South Asian   9. Southeast Asian   10. West Asian   11. White (European descent)   12. Other ethnic background   13. Multiple ethnic backgrounds |
| SDC_EB_F_CAT                                               | Father's ethnic background                                                                    | Father's ethnic background derived from a multiple selection question.                                                  | 1. Aboriginal   2. Arab   3. Black (African or Caribbean descent)   4. East Asian   5. Filipino   6. Jewish   7. Latin American/Hispanic   8. South Asian   9. Southeast Asian   10. West Asian   11. White (European descent)   12. Other ethnic background   13. Multiple ethnic backgrounds |
| SDC_EB_M_CAT                                               | Mother's ethnic background                                                                    | Mother's ethnic background derived from a multiple selection question.                                                  | 1. Aboriginal   2. Arab   3. Black (African or Caribbean descent)   4. East Asian   5. Filipino   6. Jewish   7. Latin American/Hispanic   8. South Asian   9. Southeast Asian   10. West Asian   11. White (European descent)   12. Other ethnic background   13. Multiple ethnic backgrounds |
| <b>Sociodemographic economic characteristics-Language</b>  |                                                                                               |                                                                                                                         |                                                                                                                                                                                                                                                                                                |
| SDC_LANG_ABORIGINAL                                        | Language first learned - Aboriginal language(s)                                               | Indicator of whether Aboriginal is the participant's first language learned at home and he/she still understands it.    | 0. An aboriginal language is not one of the participant's first languages   1. An aboriginal language is one of the participant's first languages                                                                                                                                              |
| SDC_LANG_ARABIC                                            | Language first learned - Arabic                                                               | Indicator of whether Arabic is the participant's first language learned at home and he/she still understands it.        | 0. Arabic is not one of the participant's first languages   1. Arabic is one of the participant's first languages                                                                                                                                                                              |
| SDC_LANG_BENGALI                                           | Language first learned - Bengali                                                              | Indicator of whether Bengali is the participant's first language learned at home and he/she still understands it.       | 0. Bengali is not one of the participant's first languages   1. Bengali is one of the participant's first languages                                                                                                                                                                            |
| SDC_LANG_CANTONESE                                         | Language first learned - Cantonese                                                            | Indicator of whether Cantonese is the participant's first language learned at home and he/she still understands it.     | 0. Cantonese is not one of the participant's first languages   1. Cantonese is one of the participant's first languages                                                                                                                                                                        |
| SDC_LANG_DANISH                                            | Language first learned - Danish                                                               | Indicator of whether Danish is the participant's first language learned at home and he/she still understands it.        | 0. Danish is not one of the participant's first languages   1. Danish is one of the participant's first languages                                                                                                                                                                              |
| SDC_LANG_DUTCH                                             | Language first learned - Dutch                                                                | Indicator of whether Dutch is the participant's first language learned at home and he/she still understands it.         | 0. Dutch is not one of the participant's first languages   1. Dutch is one of the participant's first languages                                                                                                                                                                                |
| SDC_LANG_ENGLISH                                           | Language first learned - English                                                              | Indicator of whether English is the participant's first language learned at home and he/she still understands it.       | 0. English is not one of the participant's first languages   1. English is one of the participant's first languages                                                                                                                                                                            |
| SDC_LANG_FARSI_PERSIAN                                     | Language first learned - Farsi/Persian                                                        | Indicator of whether Farsi/Persian is the participant's first language learned at home and he/she still understands it. | 0. Farsi/Persian is not one of the participant's first languages   1. Farsi/Persian is one of the participant's first languages                                                                                                                                                                |
| SDC_LANG_FINNISH                                           | Language first learned - Finnish                                                              | Indicator of whether Finnish is the participant's first language learned at home and he/she still understands it.       | 0. Finnish is not one of the participant's first languages   1. Finnish is one of the participant's first languages                                                                                                                                                                            |
| SDC_LANG_FRENCH                                            | Language first learned - French                                                               | Indicator of whether French is the participant's first language learned at home and he/she still understands it.        | 0. French is not one of the participant's first languages   1. French is one of the participant's first languages                                                                                                                                                                              |
| SDC_LANG_GAELIC                                            | Language first learned - Gaelic                                                               | Indicator of whether Gaelic is the participant's first language learned at home and he/she still understands it.        | 0. Gaelic is not one of the participant's first languages   1. Gaelic is one of the participant's first languages                                                                                                                                                                              |
| SDC_LANG_GERMAN                                            | Language first learned - German                                                               | Indicator of whether German is the participant's first language learned at home and he/she still understands it.        | 0. German is not one of the participant's first languages   1. German is one of the participant's first languages                                                                                                                                                                              |
| SDC_LANG_GREEK                                             | Language first learned - Greek                                                                | Indicator of whether Greek is the participant's first language learned at home and he/she still understands it.         | 0. Greek is not one of the participant's first languages   1. Greek is one of the participant's first languages                                                                                                                                                                                |

**Appendix 1 (as supplied by the authors): List of the Health and Risk Factor Questionnaire DataSchema variables (Version 2.0 - Oct. 2017)**

| Variable                                                           | label                                     | Description                                                                                                                                                | Categories                                                                                                                                                                                                                                                                                                                                                                                                                                                                                                                                                                                                                                                                                                                                               |
|--------------------------------------------------------------------|-------------------------------------------|------------------------------------------------------------------------------------------------------------------------------------------------------------|----------------------------------------------------------------------------------------------------------------------------------------------------------------------------------------------------------------------------------------------------------------------------------------------------------------------------------------------------------------------------------------------------------------------------------------------------------------------------------------------------------------------------------------------------------------------------------------------------------------------------------------------------------------------------------------------------------------------------------------------------------|
| SDC_LANG_HINDI                                                     | Language first learned - Hindi            | Indicator of whether Hindi is the participant's first language learned at home and he/she still understands it.                                            | 0. Hindi is not one of the participant's first languages   1. Hindi is one of the participant's first languages                                                                                                                                                                                                                                                                                                                                                                                                                                                                                                                                                                                                                                          |
| SDC_LANG_HUNGARIAN                                                 | Language first learned - Hungarian        | Indicator of whether Hungarian is the participant's first language learned at home and he/she still understands it.                                        | 0. Hungarian is not one of the participant's first languages   1. Hungarian is one of the participant's first languages                                                                                                                                                                                                                                                                                                                                                                                                                                                                                                                                                                                                                                  |
| SDC_LANG_ICELANDIC                                                 | Language first learned - Icelandic        | Indicator of whether Icelandic is the participant's first language learned at home and he/she still understands it.                                        | 0. Icelandic is not one of the participant's first languages   1. Icelandic is one of the participant's first languages                                                                                                                                                                                                                                                                                                                                                                                                                                                                                                                                                                                                                                  |
| SDC_LANG_ITALIAN                                                   | Language first learned - Italian          | Indicator of whether Italian is the participant's first language learned at home and he/she still understands it.                                          | 0. Italian is not one of the participant's first languages   1. Italian is one of the participant's first languages                                                                                                                                                                                                                                                                                                                                                                                                                                                                                                                                                                                                                                      |
| SDC_LANG_KOREAN                                                    | Language first learned - Korean           | Indicator of whether Korean is the participant's first language learned at home and he/she still understands it.                                           | 0. Korean is not one of the participant's first languages   1. Korean is one of the participant's first languages                                                                                                                                                                                                                                                                                                                                                                                                                                                                                                                                                                                                                                        |
| SDC_LANG_MANDARIN                                                  | Language first learned - Mandarin         | Indicator of whether Mandarin is the participant's first language learned at home and he/she still understands it.                                         | 0. Mandarin is not one of the participant's first languages   1. Mandarin is one of the participant's first languages                                                                                                                                                                                                                                                                                                                                                                                                                                                                                                                                                                                                                                    |
| SDC_LANG_NORWEGIAN                                                 | Language first learned - Norwegian        | Indicator of whether Norwegian is the participant's first language learned at home and he/she still understands it.                                        | 0. Norwegian is not one of the participant's first languages   1. Norwegian is one of the participant's first languages                                                                                                                                                                                                                                                                                                                                                                                                                                                                                                                                                                                                                                  |
| SDC_LANG_OTHER                                                     | Language first learned - Other            | Indicator of whether the participant's first language learned at home and he/she still understands it.                                                     | 0. Participant learned no other first languages   1. Participant learned other first language                                                                                                                                                                                                                                                                                                                                                                                                                                                                                                                                                                                                                                                            |
| SDC_LANG_OTSP                                                      | Language first learned, Other specify     | Name of other language(s) first learned at home that the participant still understands.                                                                    | NA                                                                                                                                                                                                                                                                                                                                                                                                                                                                                                                                                                                                                                                                                                                                                       |
| SDC_LANG_POLISH                                                    | Language first learned - Polish           | Indicator of whether Polish is the participant's first language learned at home and he/she still understands it.                                           | 0. Polish is not one of the participant's first languages   1. Polish is one of the participant's first languages                                                                                                                                                                                                                                                                                                                                                                                                                                                                                                                                                                                                                                        |
| SDC_LANG_PORTUGUESE                                                | Language first learned - Portuguese       | Indicator of whether Portuguese is the participant's first language learned at home and he/she still understands it.                                       | 0. Portuguese is not one of the participant's first languages   1. Portuguese is one of the participant's first languages                                                                                                                                                                                                                                                                                                                                                                                                                                                                                                                                                                                                                                |
| SDC_LANG_PUNJABI                                                   | Language first learned - Punjabi          | Indicator of whether Punjabi is the participant's first language learned at home and he/she still understands it.                                          | 0. Punjabi is not one of the participant's first languages   1. Punjabi is one of the participant's first languages                                                                                                                                                                                                                                                                                                                                                                                                                                                                                                                                                                                                                                      |
| SDC_LANG_RUSSIAN                                                   | Language first learned - Russian          | Indicator of whether Russian is the participant's first language learned at home and he/she still understands it.                                          | 0. Russian is not one of the participant's first languages   1. Russian is one of the participant's first languages                                                                                                                                                                                                                                                                                                                                                                                                                                                                                                                                                                                                                                      |
| SDC_LANG_SPANISH                                                   | Language first learned - Spanish          | Indicator of whether Spanish is the participant's first language learned at home and he/she still understands it.                                          | 0. Spanish is not one of the participant's first languages   1. Spanish is one of the participant's first languages                                                                                                                                                                                                                                                                                                                                                                                                                                                                                                                                                                                                                                      |
| SDC_LANG_SWEDISH                                                   | Language first learned - Swedish          | Indicator of whether Swedish is the participant's first language learned at home and he/she still understands it.                                          | 0. Swedish is not one of the participant's first languages   1. Swedish is one of the participant's first languages                                                                                                                                                                                                                                                                                                                                                                                                                                                                                                                                                                                                                                      |
| SDC_LANG_TAGALOG_FILIPIN O                                         | Language first learned - Tagalog/Filipino | Indicator of whether Tagalog/Filipino is the participant's first language learned at home and he/she still understands it.                                 | 0. Tagalog/Filipino is not one of the participant's first languages   1. Tagalog/Filipino is one of the participant's first languages                                                                                                                                                                                                                                                                                                                                                                                                                                                                                                                                                                                                                    |
| SDC_LANG_TAMIL                                                     | Language first learned - Tamil            | Indicator of whether Tamil is the participant's first language learned at home and he/she still understands it.                                            | 0. Tamil is not one of the participant's first languages   1. Tamil is one of the participant's first languages                                                                                                                                                                                                                                                                                                                                                                                                                                                                                                                                                                                                                                          |
| SDC_LANG_UKRAINIAN                                                 | Language first learned - Ukrainian        | Indicator of whether Ukrainian is the participant's first language learned at home and he/she still understands it.                                        | 0. Ukrainian is not one of the participant's first languages   1. Ukrainian is one of the participant's first languages                                                                                                                                                                                                                                                                                                                                                                                                                                                                                                                                                                                                                                  |
| SDC_LANG_URDU                                                      | Language first learned - Urdu             | Indicator of whether Urdu is the participant's first language learned at home and he/she still understands it.                                             | 0. Urdu is not one of the participant's first languages   1. Urdu is one of the participant's first languages                                                                                                                                                                                                                                                                                                                                                                                                                                                                                                                                                                                                                                            |
| SDC_LANG_VIETNAMESE                                                | Language first learned - Vietnamese       | Indicator of whether Vietnamese is the participant's first language learned at home and he/she still understands it.                                       | 0. Vietnamese is not one of the participant's first languages   1. Vietnamese is one of the participant's first languages                                                                                                                                                                                                                                                                                                                                                                                                                                                                                                                                                                                                                                |
| SDC_LANG_WELSH                                                     | Language first learned - Welsh            | Indicator of whether Welsh is the participant's first language learned at home and he/she still understands it.                                            | 0. Welsh is not one of the participant's first languages   1. Welsh is one of the participant's first languages                                                                                                                                                                                                                                                                                                                                                                                                                                                                                                                                                                                                                                          |
| <b>Sociodemographic economic characteristics-Labour retirement</b> |                                           |                                                                                                                                                            |                                                                                                                                                                                                                                                                                                                                                                                                                                                                                                                                                                                                                                                                                                                                                          |
| WRK_EMPLOYMENT                                                     | Employment status                         | Indicator of whether the participant currently has paid employment or is self-employed (including full-time and part time status).                         | 0. Participant is not currently employed   1. Participant is currently employed                                                                                                                                                                                                                                                                                                                                                                                                                                                                                                                                                                                                                                                                          |
| WRK_FULL_TIME                                                      | Full-time employed                        | Indicator of whether the participant is currently employed full-time (paid employment or self-employed).<br><br>Full time means 30 hours or more per week. | 0. Participant is not full-time employed/self-employed   1. Participant is full-time employed/self-employed                                                                                                                                                                                                                                                                                                                                                                                                                                                                                                                                                                                                                                              |
| WRK_HOME_FAMILY                                                    | Looking after home/family                 | Indicator of whether the participant is currently looking after a home and/or a family.                                                                    | 0. Participant is not looking after home/family   1. Participant is looking after home/family                                                                                                                                                                                                                                                                                                                                                                                                                                                                                                                                                                                                                                                            |
| WRK_IND_TYPE_CUR_CAT                                               | Current type of industry - categorical    | Type of industry in which the participant currently works - specified categories.                                                                          | 1. Agriculture, hunting and forestry   2. Fishing   3. Mining and quarrying   4. Manufacturing   5. Electricity, gas and water supply   6. Construction   7. Wholesale and retail trade; repair of motor vehicles, motorcycles and personal and household goods   8. Hotels and restaurants   9. Transportation, storage and communications   10. Financial intermediation   11. Real estate, renting, and business activities   12. Public administration and defense; compulsory social security   13. Education   14. Health and social work   15. Other community, social, and personal service activities   16. Private households with employed persons   17. Extra-territorial organizations and bodies   18. Other industry   -7. Not Applicable |

**Appendix 1 (as supplied by the authors): List of the Health and Risk Factor Questionnaire DataSchema variables (Version 2.0 - Oct. 2017)**

| Variable                                                     | label                                                             | Description                                                                                                                                                  | Categories                                                                                                                                                                                                                                                                                                                                                                                                                                                                                                                                                                                                                                                                                                                                                                    |
|--------------------------------------------------------------|-------------------------------------------------------------------|--------------------------------------------------------------------------------------------------------------------------------------------------------------|-------------------------------------------------------------------------------------------------------------------------------------------------------------------------------------------------------------------------------------------------------------------------------------------------------------------------------------------------------------------------------------------------------------------------------------------------------------------------------------------------------------------------------------------------------------------------------------------------------------------------------------------------------------------------------------------------------------------------------------------------------------------------------|
| WRK_IND_TYPE_CUR_OPEN                                        | Current type of industry - open text                              | Type of industry in which the participant currently works - open text.                                                                                       | -7. Not Applicable                                                                                                                                                                                                                                                                                                                                                                                                                                                                                                                                                                                                                                                                                                                                                            |
| WRK_IND_TYPE_LONGEST_C<br>AT                                 | Type of industry for occupation of longest duration - categorical | Type of industry in which the participant worked for the longest duration - specified categories.                                                            | 0. Never been employed or self-employed   1. Agriculture, hunting and forestry   2. Fishing   3. Mining and quarrying   4. Manufacturing   5. Electricity, gas and water supply   6. Construction   7. Wholesale and retail trade; repair of motor vehicles, motorcycles and personal and household goods   8. Hotels and restaurants   9. Transportation, storage and communications   10. Financial intermediation   11. Real estate, renting, and business activities   12. Public administration and defense; compulsory social security   13. Education   14. Health and social work   15. Other community, social, and personal service activities   16. Private households with employed persons   17. Extra-territorial organizations and bodies   -7. Not Applicable |
| WRK_IND_TYPE_LONGEST_O<br>PEN                                | Type of industry for occupation of longest duration - open text   | Type of industry in which the participant worked for the longest duration - open text.                                                                       | -7. Not Applicable                                                                                                                                                                                                                                                                                                                                                                                                                                                                                                                                                                                                                                                                                                                                                            |
| WRK_JOB_AGE_CUR                                              | Age started current job                                           | Age at which the participant started working at his current job.                                                                                             | -7. Not Applicable                                                                                                                                                                                                                                                                                                                                                                                                                                                                                                                                                                                                                                                                                                                                                            |
| WRK_JOB_CUR_LONGEST                                          | Current occupation held for longest duration                      | Indicator of whether the current job of the participant is the one he held the longest.                                                                      | 0. Current occupation not the one held for longest duration   1. Current occupation held for longest duration   -7. Not Applicable                                                                                                                                                                                                                                                                                                                                                                                                                                                                                                                                                                                                                                            |
| WRK_JOB_LONGEST_AGE_ST<br>ART                                | Age started job of longest duration                               | Age at which the participant started working at the job held for longest duration.                                                                           | -7. Not Applicable                                                                                                                                                                                                                                                                                                                                                                                                                                                                                                                                                                                                                                                                                                                                                            |
| WRK_JOB_LONGEST_AGE_ST<br>OP                                 | Age stopped job of longest duration                               | Age at which the participant stopped working at the job held for longest duration.                                                                           | -7. Not Applicable                                                                                                                                                                                                                                                                                                                                                                                                                                                                                                                                                                                                                                                                                                                                                            |
| WRK_JOB_TITLE_CUR_OPEN                                       | Current job title - open text                                     | Participant's current job title - open text.                                                                                                                 | -7. Not Applicable                                                                                                                                                                                                                                                                                                                                                                                                                                                                                                                                                                                                                                                                                                                                                            |
| WRK_JOB_TITLE_LONGEST_O<br>PEN                               | Job title for occupation of longest duration - open text          | Participant's type of job held for longest period of time - open text.                                                                                       | -7. Not Applicable                                                                                                                                                                                                                                                                                                                                                                                                                                                                                                                                                                                                                                                                                                                                                            |
| WRK_JOB_TYPE_CUR_CAT                                         | Current type of job - categorical                                 | Participant's current job type - specified categories.                                                                                                       | 1. Legislators, senior officials and managers   2. Professionals   3. Technicians and associate professionals   4. Clerks   5. Service workers and shop and market sales workers   6. Skilled agricultural and fishery workers   7. Crafts and trades workers   8. Plant and machine operators and assemblers   9. Elementary occupations   10. Armed forces   11. Other job type   -7. Not Applicable                                                                                                                                                                                                                                                                                                                                                                        |
| WRK_JOB_TYPE_LONGEST_C<br>AT                                 | Type of job held for longest duration - categorical               | Participant's type of job held for longest period of time - specified categories.                                                                            | 1. Legislators, senior officials and managers   2. Professionals   3. Technicians and associate professionals   4. Clerks   5. Service workers and shop and market sales workers   6. Skilled agricultural and fishery workers   7. Crafts and trades workers   8. Plant and machine operators and assemblers   9. Elementary occupations   10. Armed forces   11. Other job type   -7. Not Applicable                                                                                                                                                                                                                                                                                                                                                                        |
| WRK_PART_TIME                                                | Part-time employed                                                | Indicator of whether the participant is currently employed part-time (paid employment or self-employed).<br><br>Part time means less than 30 hours per week. | 0. Participant is not part-time employed/self-employed   1. Participant is part-time employed/self-employed                                                                                                                                                                                                                                                                                                                                                                                                                                                                                                                                                                                                                                                                   |
| WRK_RETIREMENT                                               | Retired                                                           | Indicator of whether the participant is currently retired.                                                                                                   | 0. Participant is not retired   1. Participant is retired                                                                                                                                                                                                                                                                                                                                                                                                                                                                                                                                                                                                                                                                                                                     |
| WRK_SCHEDULE_CUR_CAT                                         | Current working schedule                                          | Working schedule of the participant at his current job.                                                                                                      | 1. Regular - daytime schedule or shift   2. Regular - evening shift   3. Regular - night shift   4. Rotating shift, changing periodically from days to evenings or to nights   5. Split shift, consisting of two or more distinct periods each day   6. Irregular schedule, or on call   7. Other schedule   -7. Not Applicable                                                                                                                                                                                                                                                                                                                                                                                                                                               |
| WRK_SCHEDULE_CUR_OTSP                                        | Current working schedule, other specify                           | Other working schedule of the participant at his current job.                                                                                                | NA                                                                                                                                                                                                                                                                                                                                                                                                                                                                                                                                                                                                                                                                                                                                                                            |
| WRK_SCHEDULE_LONGEST_C<br>AT                                 | Working schedule for occupation held longest time                 | Working schedule of the participant at his job held for longest duration.                                                                                    | 1. Regular - daytime schedule or shift   2. Regular - evening shift   3. Regular - night shift   4. Rotating shift, changing periodically from days to evenings or to nights   5. Split shift, consisting of two or more distinct periods each day   6. Irregular schedule, or on call   7. Other schedule not listed   -7. Not Applicable                                                                                                                                                                                                                                                                                                                                                                                                                                    |
| WRK_SCHEDULE_LONGEST_O<br>TSP                                | Working schedule for occupation held longest time, other specify  | Other working schedule of the participant at his job held for longest duration.                                                                              | NA                                                                                                                                                                                                                                                                                                                                                                                                                                                                                                                                                                                                                                                                                                                                                                            |
| WRK_STUDENT                                                  | Student                                                           | Indicator of whether the participant is currently a student.                                                                                                 | 0. Participant is not a student   1. Participant is a student                                                                                                                                                                                                                                                                                                                                                                                                                                                                                                                                                                                                                                                                                                                 |
| WRK_UNABLE                                                   | Unable to work                                                    | Indicator of whether the participant is currently unable to work because of sickness or disability.                                                          | 0. Participant is not unable to work   1. Participant is unable to work                                                                                                                                                                                                                                                                                                                                                                                                                                                                                                                                                                                                                                                                                                       |
| WRK_UNEMPLOYED                                               | Unemployed                                                        | Indicator of whether the participant is currently unemployed.                                                                                                | 0. Participant is not unemployed   1. Participant is unemployed                                                                                                                                                                                                                                                                                                                                                                                                                                                                                                                                                                                                                                                                                                               |
| WRK_UNPAID                                                   | Doing unpaid work                                                 | Indicator of whether the participant is currently doing unpaid or voluntary work.                                                                            | 0. Participant does not do unpaid work   1. Participant does unpaid work                                                                                                                                                                                                                                                                                                                                                                                                                                                                                                                                                                                                                                                                                                      |
| <b>Sociodemographic economic characteristics-Birth place</b> |                                                                   |                                                                                                                                                              |                                                                                                                                                                                                                                                                                                                                                                                                                                                                                                                                                                                                                                                                                                                                                                               |
| SDC_BIRTH_COUNTRY                                            | Participant's country of birth                                    | Country where the participant was born.                                                                                                                      | 1. Canada   2. China   3. France   4. Germany   5. Greece   6. India   7. Islamic Republic of Iran   8. Ireland   9. Italy   10. Jamaica   11. Republic of Korea   12. Philippines   13. Poland   14. Portugal   15. Russian Federation   16. Ukraine   17. United Kingdom   18. United States   19. Viet Nam   20. Other                                                                                                                                                                                                                                                                                                                                                                                                                                                     |
| SDC_BIRTH_COUNTRY_F                                          | Father's country of birth                                         | Country where the participant's biological father was born.                                                                                                  | 1. Canada   2. China   3. France   4. Germany   5. Greece   6. India   7. Islamic Republic of Iran   8. Ireland   9. Italy   10. Jamaica   11. Republic of Korea   12. Philippines   13. Poland   14. Portugal   15. Russian Federation   16. Ukraine   17. United Kingdom   18. United States   19. Viet Nam   20. Other                                                                                                                                                                                                                                                                                                                                                                                                                                                     |
| SDC_BIRTH_COUNTRY_FF                                         | Paternal grandfather's country of birth                           | Country where the participant's biological paternal grandfather was born.                                                                                    | 1. Canada   2. China   3. France   4. Germany   5. Greece   6. India   7. Islamic Republic of Iran   8. Ireland   9. Italy   10. Jamaica   11. Republic of Korea   12. Philippines   13. Poland   14. Portugal   15. Russian Federation   16. Ukraine   17. United Kingdom   18. United States   19. Viet Nam   20. Other                                                                                                                                                                                                                                                                                                                                                                                                                                                     |

**Appendix 1 (as supplied by the authors): List of the Health and Risk Factor Questionnaire DataSchema variables (Version 2.0 - Oct. 2017)**

| Variable                                                                        | label                                                   | Description                                                                                                                                                                                                                                                                          | Categories                                                                                                                                                                                                                                                                                                                |
|---------------------------------------------------------------------------------|---------------------------------------------------------|--------------------------------------------------------------------------------------------------------------------------------------------------------------------------------------------------------------------------------------------------------------------------------------|---------------------------------------------------------------------------------------------------------------------------------------------------------------------------------------------------------------------------------------------------------------------------------------------------------------------------|
| SDC_BIRTH_COUNTRY_FF_OT SP                                                      | Paternal grandfather's country of birth, other specify  | Name of other country where the participant's biological paternal grandfather was born.                                                                                                                                                                                              | NA                                                                                                                                                                                                                                                                                                                        |
| SDC_BIRTH_COUNTRY_FM                                                            | Paternal grandmother's country of birth                 | Country where the participant's biological paternal grandmother was born.                                                                                                                                                                                                            | 1. Canada   2. China   3. France   4. Germany   5. Greece   6. India   7. Islamic Republic of Iran   8. Ireland   9. Italy   10. Jamaica   11. Republic of Korea   12. Philippines   13. Poland   14. Portugal   15. Russian Federation   16. Ukraine   17. United Kingdom   18. United States   19. Viet Nam   20. Other |
| SDC_BIRTH_COUNTRY_FM_O TSP                                                      | Paternal grandmother's country of birth, other specify  | Name of other country where the participant's biological paternal grandmother was born.                                                                                                                                                                                              | NA                                                                                                                                                                                                                                                                                                                        |
| SDC_BIRTH_COUNTRY_F_OTSP                                                        | Father's country of birth, other specify                | Name of other country where the participant's biological father was born.                                                                                                                                                                                                            | NA                                                                                                                                                                                                                                                                                                                        |
| SDC_BIRTH_COUNTRY_M                                                             | Mother's country of birth                               | Country where the participant's biological mother was born.                                                                                                                                                                                                                          | 1. Canada   2. China   3. France   4. Germany   5. Greece   6. India   7. Islamic Republic of Iran   8. Ireland   9. Italy   10. Jamaica   11. Republic of Korea   12. Philippines   13. Poland   14. Portugal   15. Russian Federation   16. Ukraine   17. United Kingdom   18. United States   19. Viet Nam   20. Other |
| SDC_BIRTH_COUNTRY_MF                                                            | Maternal grandfather's country of birth                 | Country where the participant's biological maternal grandfather was born.                                                                                                                                                                                                            | 1. Canada   2. China   3. France   4. Germany   5. Greece   6. India   7. Islamic Republic of Iran   8. Ireland   9. Italy   10. Jamaica   11. Republic of Korea   12. Philippines   13. Poland   14. Portugal   15. Russian Federation   16. Ukraine   17. United Kingdom   18. United States   19. Viet Nam   20. Other |
| SDC_BIRTH_COUNTRY_MF_O TSP                                                      | Maternal grandfather's country of birth, other specify  | Name of other country where the participant's biological maternal grandfather was born.                                                                                                                                                                                              | NA                                                                                                                                                                                                                                                                                                                        |
| SDC_BIRTH_COUNTRY_MM                                                            | Maternal grandmother's country of birth                 | Country where the participant's biological maternal grandmother was born.                                                                                                                                                                                                            | 1. Canada   2. China   3. France   4. Germany   5. Greece   6. India   7. Islamic Republic of Iran   8. Ireland   9. Italy   10. Jamaica   11. Republic of Korea   12. Philippines   13. Poland   14. Portugal   15. Russian Federation   16. Ukraine   17. United Kingdom   18. United States   19. Viet Nam   20. Other |
| SDC_BIRTH_COUNTRY_MM_OTSP                                                       | Maternal grandmother's country of birth, other specify  | Name of other country where the participant's biological maternal grandmother was born.                                                                                                                                                                                              | NA                                                                                                                                                                                                                                                                                                                        |
| SDC_BIRTH_COUNTRY_M_OT SP                                                       | Mother's country of birth, other specify                | Name of other country where the participant's biological mother was born.                                                                                                                                                                                                            | NA                                                                                                                                                                                                                                                                                                                        |
| SDC_BIRTH_COUNTRY_OTSP                                                          | Participant's country of birth, other specify           | Name of other country where the participant was born.                                                                                                                                                                                                                                | NA                                                                                                                                                                                                                                                                                                                        |
| <b>Sociodemographic economic characteristics-Family and household structure</b> |                                                         |                                                                                                                                                                                                                                                                                      |                                                                                                                                                                                                                                                                                                                           |
| SDC_BROTHERS_NB                                                                 | Number of biological brothers                           | Number of biological (one or two common parents) brothers of the participant.                                                                                                                                                                                                        | NA                                                                                                                                                                                                                                                                                                                        |
| SDC_HOUSEHOLD_ADULTS_NB                                                         | Number of adults in the household                       | Number of adults (age 18 or older) currently living in the same household including the participant.                                                                                                                                                                                 | NA                                                                                                                                                                                                                                                                                                                        |
| SDC_HOUSEHOLD_ADULTS_NB_CAT                                                     | Number of adults in the household - categorical         | Number of adults (age 18 or older) currently living in the same household including the participant.                                                                                                                                                                                 | 1. 1 adult   2. 2 adults   3. 3 adults   4. 4 adults   5. 5 adults   6. 6 adults   7. 7 adults   8. 8 adults   9. 9 adults   10. 10 adults   11. 11 adults   12. 12 adults and more                                                                                                                                       |
| SDC_HOUSEHOLD_CHILDREN_NB                                                       | Number of children in the household                     | Number of children (under 18 years of age) currently living in the participant's household.                                                                                                                                                                                          | NA                                                                                                                                                                                                                                                                                                                        |
| SDC_HOUSEHOLD_CHILDREN_NB_CAT                                                   | Number of children in the household - categorical       | Number of children (under 18 years of age) currently living in the participant's household.                                                                                                                                                                                          | 0. No children   1. 1 child   2. 2 children   3. 3 children   4. 4 children   5. 5 children   6. 6 children   7. 7 children   8. 8 children   9. 9 children   10. 10 children   11. 11 children   12. 12 children and more                                                                                                |
| SDC_SIB_NB                                                                      | Number of biological siblings                           | Number of biological (one or two common parents) siblings of the participant.                                                                                                                                                                                                        | NA                                                                                                                                                                                                                                                                                                                        |
| SDC_SIB_NB_CAT                                                                  | Number of biological siblings - categorical             | Number of biological (one or two common parents) siblings of the participant.                                                                                                                                                                                                        | 0. No sibling   1. 1 sibling   2. 2 siblings   3. 3 siblings   4. 4 siblings   5. 5 siblings   6. 6 siblings   7. 7 siblings   8. 8 siblings   9. 9 siblings   10. 10 siblings   11. 11 siblings   12. 12 siblings and more                                                                                               |
| SDC_SIB_OLDER_NB                                                                | Number of siblings older than participant               | Number of biological (one or two common parents) siblings older than the participant.                                                                                                                                                                                                | -7. Not Applicable                                                                                                                                                                                                                                                                                                        |
| SDC_SIB_OLDER_NB_CAT                                                            | Number of siblings older than participant - categorical | Number of biological (one or two common parents) siblings older than the participant.                                                                                                                                                                                                | 0. No sibling   1. 1 sibling   2. 2 siblings   3. 3 siblings   4. 4 siblings   5. 5 siblings   6. 6 siblings   7. 7 siblings   8. 8 siblings   9. 9 siblings   10. 10 siblings   11. 11 siblings   12. 12 siblings and more   -7. Not Applicable                                                                          |
| SDC_SISTERS_NB                                                                  | Number of biological sisters                            | Number of biological (one or two common parents) sisters of the participant.                                                                                                                                                                                                         | NA                                                                                                                                                                                                                                                                                                                        |
| <b>Sociodemographic economic characteristics-Possession and benefits</b>        |                                                         |                                                                                                                                                                                                                                                                                      |                                                                                                                                                                                                                                                                                                                           |
| SDC_INCOME                                                                      | Household income before taxes                           | Average annual income, before taxes, of the participant's entire household including salaries, pensions, and allowances.                                                                                                                                                             | 1. Less than 10 000 \$   2. 10 000 \$ - 24 999 \$   3. 25 000 \$ - 49 999 \$   4. 50 000 \$ - 74 999 \$   5. 75 000 \$ - 99 999 \$   6. 100 000 \$ - 149 999 \$   7. 150 000 \$ - 199 999 \$   8. 200 000 \$ or more                                                                                                      |
| SDC_INCOME_IND_NB                                                               | Number of individuals supported by income               | Number of individuals supported by the average annual income of the participant's entire household, including children, parents and other persons living outside the participant's home.<br><br>Minimum value of 1 considering the participant is supported by his household income. | NA                                                                                                                                                                                                                                                                                                                        |
| SDC_INCOME_IND_NB_CAT                                                           | Number of individuals supported by income - categorical | Number of individuals supported by the average annual income of the participant's entire household, including children, parents and other persons living outside the participant's home.<br><br>Minimum value of 1 considering the participant is supported by his household income. | 1. 1 individual   2. 2 individuals   3. 3 individuals   4. 4 individuals   5. 5 individuals   6. 6 individuals   7. 7 individuals   8. 8 individuals   9. 9 individuals   10. 10 individuals   11. 11 individuals   12. 12 individuals and more                                                                           |

Appendix 1 (as supplied by the authors): List of the Health and Risk Factor Questionnaire DataSchema variables (Version 2.0 - Oct. 2017)

| Variable                                                                | label                                      | Description                                                                                                                                                                                            | Categories                                                                                                                                                                                                                                                                                                                                                |
|-------------------------------------------------------------------------|--------------------------------------------|--------------------------------------------------------------------------------------------------------------------------------------------------------------------------------------------------------|-----------------------------------------------------------------------------------------------------------------------------------------------------------------------------------------------------------------------------------------------------------------------------------------------------------------------------------------------------------|
| <b>Sociodemographic economic characteristics-Education</b>              |                                            |                                                                                                                                                                                                        |                                                                                                                                                                                                                                                                                                                                                           |
| SDC_EDU_LEVEL                                                           | Highest level of education completed       | Highest level of education completed by the participant.                                                                                                                                               | 0. None   1. Elementary school   2. High school   3. Trade, technical or vocational school, apprenticeship training or technical CEGEP   4. Diploma from a community college, pre-university CEGEP or non-university certificate   5. University certificate below bachelor's level   6. Bachelor's degree   7. Graduate degree (MSc, MBA, MD, PhD, etc.) |
| SDC_EDU_LEVEL_AGE                                                       | Age highest level education completed      | Age at which the participant completed the highest level of education.                                                                                                                                 | -7. Not Applicable                                                                                                                                                                                                                                                                                                                                        |
| <b>Sociodemographic economic characteristics-Age</b>                    |                                            |                                                                                                                                                                                                        |                                                                                                                                                                                                                                                                                                                                                           |
| SDC_AGE_CALC                                                            | Age                                        | Participant's age at questionnaire completion, calculated from birth date and date of questionnaire completion.                                                                                        | NA                                                                                                                                                                                                                                                                                                                                                        |
| <b>Sociodemographic economic characteristics-Marital status</b>         |                                            |                                                                                                                                                                                                        |                                                                                                                                                                                                                                                                                                                                                           |
| SDC_MARITAL_STATUS                                                      | Marital status                             | Participant's current marital status.                                                                                                                                                                  | 1. Married and/or living with a partner   2. Divorced   3. Widowed   4. Separated   5. Single, never married                                                                                                                                                                                                                                              |
| <b>Sociodemographic economic characteristics-Other sociodemographic</b> |                                            |                                                                                                                                                                                                        |                                                                                                                                                                                                                                                                                                                                                           |
| SDC_ADOPTED_CHILD                                                       | Adopted                                    | Indicator of whether the participant was adopted.                                                                                                                                                      | 0. Not adopted   1. Adopted                                                                                                                                                                                                                                                                                                                               |
| <b>Sociodemographic economic characteristics-Residence</b>              |                                            |                                                                                                                                                                                                        |                                                                                                                                                                                                                                                                                                                                                           |
| SDC_ARRIVAL_AGE                                                         | Age of arrival in Canada                   | Age of the participant when he first came to live in Canada.                                                                                                                                           | -7. Not Applicable                                                                                                                                                                                                                                                                                                                                        |
| <b>Sociodemographic economic characteristics-Sex</b>                    |                                            |                                                                                                                                                                                                        |                                                                                                                                                                                                                                                                                                                                                           |
| SDC_GENDER                                                              | Gender                                     | Gender of the participant.                                                                                                                                                                             | 1. Male   2. Female                                                                                                                                                                                                                                                                                                                                       |
| <b>Sociodemographic economic characteristics-Twin</b>                   |                                            |                                                                                                                                                                                                        |                                                                                                                                                                                                                                                                                                                                                           |
| SDC_MULTIPLE_BIRTH                                                      | Child of a multiple birth                  | Indicator of whether the participant was a child of a multiple birth                                                                                                                                   | 0. Not born in a multiple birth   1. Born in a multiple birth   -7. Not Applicable                                                                                                                                                                                                                                                                        |
| <b>Lifestyle behaviours-Physical activity</b>                           |                                            |                                                                                                                                                                                                        |                                                                                                                                                                                                                                                                                                                                                           |
| PA_LEVEL_LONG                                                           | Total physical activity level              | Categorical indicator of the participant's level of physical activity (IPAQ long form).                                                                                                                | 1. Low level of physical activity   2. Moderate level of physical activity   3. High level of physical activity                                                                                                                                                                                                                                           |
| PA_LEVEL_SHORT                                                          | Total physical activity level              | Categorical indicator of the participant's level of physical activity (IPAQ short form)                                                                                                                | 1. Low level of physical activity   2. Moderate level of physical activity   3. High level of physical activity                                                                                                                                                                                                                                           |
| PA_SIT_AVG_TIME_DAY                                                     | Average sitting time per day               | Average time spent sitting per day (IPAQ long form and short form).                                                                                                                                    | NA                                                                                                                                                                                                                                                                                                                                                        |
| PA_SIT_TIME_WKDAY                                                       | Average sitting time on week day           | Average time spent sitting per week day in the last 7 days (IPAQ long form and short form).                                                                                                            | NA                                                                                                                                                                                                                                                                                                                                                        |
| PA_SIT_TIME_WKEND                                                       | Average sitting time on weekend day        | Average time spent sitting per weekend day in the last 7 days (IPAQ long form and short form).                                                                                                         | NA                                                                                                                                                                                                                                                                                                                                                        |
| PA_TOTAL_LONG                                                           | Total physical activity MET-minutes/week   | Quantitative indicator of global physical activity in metabolic equivalent (MET)-minutes per week (IPAQ long form).                                                                                    | NA                                                                                                                                                                                                                                                                                                                                                        |
| PA_TOTAL_MOD_LONG                                                       | Total moderate activities MET-minutes/week | Total physical activity MET-minutes/week = sum of Walking + Moderate + Vigorous MET-minutes/week scores                                                                                                | NA                                                                                                                                                                                                                                                                                                                                                        |
|                                                                         |                                            | Quantitative indicator of the moderate intensity activities in metabolic equivalent (MET)-minutes/week (IPAQ long form).                                                                               |                                                                                                                                                                                                                                                                                                                                                           |
|                                                                         |                                            | Total Moderate MET-minutes/week = Moderate MET-minutes/week (at Work + Yard chores + inside chores + in Leisure time) + Cycling Met-minutes/week for Transport + Vigorous Yard chores MET-minutes/week |                                                                                                                                                                                                                                                                                                                                                           |
| PA_TOTAL_MOD_SHORT                                                      | Total moderate activities MET-minutes/week | Quantitative indicator of the moderate intensity activities in metabolic equivalent (MET)-minutes/week (IPAQ short form).                                                                              | NA                                                                                                                                                                                                                                                                                                                                                        |
| PA_TOTAL_SHORT                                                          | Total physical activity MET-minutes/week   | Moderate MET-minutes/week = 4.0 * moderate-intensity activity minutes * moderate-intensity activity days                                                                                               | NA                                                                                                                                                                                                                                                                                                                                                        |
|                                                                         |                                            | Quantitative indicator of global physical activity in metabolic equivalent (MET)-minutes per week (IPAQ short form).                                                                                   |                                                                                                                                                                                                                                                                                                                                                           |
|                                                                         |                                            | Total physical activity MET-minutes/week = sum of Walking + Moderate + Vigorous MET-minutes/week scores                                                                                                |                                                                                                                                                                                                                                                                                                                                                           |
| PA_TOTAL_SIT_TIME                                                       | Total sitting time per week                | Total sitting time on average per week (IPAQ long form and short form).                                                                                                                                | NA                                                                                                                                                                                                                                                                                                                                                        |
| PA_TOTAL_VIG_LONG                                                       | Total vigorous activities MET-minutes/week | Quantitative indicator of the vigorous activities in metabolic equivalent (MET)-minutes/week (IPAQ long form).                                                                                         | NA                                                                                                                                                                                                                                                                                                                                                        |
|                                                                         |                                            | Total Vigorous MET-minutes/week = Vigorous MET-minutes/week (at Work + in Leisure)                                                                                                                     |                                                                                                                                                                                                                                                                                                                                                           |

**Appendix 1 (as supplied by the authors): List of the Health and Risk Factor Questionnaire DataSchema variables (Version 2.0 - Oct. 2017)**

| Variable                            | label                                                                        | Description                                                                                                                                                                                                                                                                                                                                           | Categories                                                                                                                                                                                                                                        |
|-------------------------------------|------------------------------------------------------------------------------|-------------------------------------------------------------------------------------------------------------------------------------------------------------------------------------------------------------------------------------------------------------------------------------------------------------------------------------------------------|---------------------------------------------------------------------------------------------------------------------------------------------------------------------------------------------------------------------------------------------------|
| PA_TOTAL_VIG_SHORT                  | Total vigorous activities MET-minutes/week                                   | Quantitative indicator of the vigorous intensity activities in metabolic equivalent (MET)-minutes/week (IPAQ short form).<br><br>Vigorous MET-minutes/week = 8.0 * vigorous-intensity activity minutes * vigorous-intensity activity days                                                                                                             | NA                                                                                                                                                                                                                                                |
| PA_TOTAL_WALK_LONG                  | Total walking MET-minutes/week                                               | Quantitative indicator of the walking activities in metabolic equivalent (MET)-minutes/week (IPAQ long form).<br><br>Total Walking MET-minutes/week = Walking MET-minutes/week (at Work + for Transport + in Leisure)                                                                                                                                 | NA                                                                                                                                                                                                                                                |
| PA_TOTAL_WALK_SHORT                 | Total walking MET-minutes/week                                               | Quantitative indicator of the walking activities in metabolic equivalent (MET)-minutes/week (IPAQ short form).<br><br>Walking MET-minutes/week = 3.3 * walking minutes * walking days                                                                                                                                                                 | NA                                                                                                                                                                                                                                                |
| <b>Lifestyle behaviours-Tobacco</b> |                                                                              |                                                                                                                                                                                                                                                                                                                                                       |                                                                                                                                                                                                                                                   |
| SMK_BETEL_CUR                       | Currently uses betel nut                                                     | Indicator of whether the participant currently uses betel nut.                                                                                                                                                                                                                                                                                        | 0. Does not currently use betel nut   1. Currently uses betel nut                                                                                                                                                                                 |
| SMK_BETEL_EVER                      | Ever used betel nut                                                          | Indicator of whether the participant has ever used betel nut on a regular basis for at least 6 months.                                                                                                                                                                                                                                                | 0. Never used betel nut   1. Ever used betel nut                                                                                                                                                                                                  |
| SMK_CIGAR_CUR                       | Currently smokes cigars                                                      | Indicator of whether the participant currently smokes cigars.                                                                                                                                                                                                                                                                                         | 0. Does not currently smoke cigars   1. Currently smokes cigars                                                                                                                                                                                   |
| SMK_CIGAR_EVER                      | Ever smoked cigars                                                           | Indicator of whether the participant has ever smoked cigars on a regular basis for at least 6 months.                                                                                                                                                                                                                                                 | 0. Never smoked cigars   1. Ever smoked cigars                                                                                                                                                                                                    |
| SMK_CIG_CUR_FREQ                    | Current cigarette smoker frequency                                           | Frequency of participant's current cigarettes consumption, if he has smoked more than 100 cigarettes during his lifetime.<br><br>"Daily" was defined as at least one cigarette every day for the past 30 days, "Occasionally" as at least one cigarette in the past 30 days, but not every day, and "No" as no cigarettes at all in the past 30 days. | 0. Does not smoke currently   1. Current occasional smoker   2. Current daily smoker   7. Not Applicable                                                                                                                                          |
| SMK_CIG_DAILY_AVG_QTY               | Number of cigarettes smoked over time - current daily smokers                | Number of cigarettes smoked per day during the total number of years the participant smoked daily (current daily smokers).                                                                                                                                                                                                                            | 1. 1-5 cigarettes smoked per day   2. 6-10 cigarettes smoked per day   3. 11-15 cigarettes smoked per day   4. 16-20 cigarettes smoked per day   5. 21-25 cigarettes smoked per day   6. 26 cigarettes or more smoked per day   7. Not Applicable |
| SMK_CIG_DAILY_AVG_QTY_26            | Number of cigarettes smoked over time, if 26 or more - current daily smokers | Number of cigarettes smoked per day during the total number of years the participant smoked daily, if 26 or more (current daily smokers).                                                                                                                                                                                                             | -7. Not Applicable                                                                                                                                                                                                                                |
| SMK_CIG_DAILY_CUR_DUR               | Duration daily cigarettes smoking - current daily smokers                    | Number of years the participant smoked cigarettes daily (current daily smokers).                                                                                                                                                                                                                                                                      | -7. Not Applicable                                                                                                                                                                                                                                |
| SMK_CIG_DAILY_CUR_ONSET             | Age first started smoking daily - current daily smokers                      | Age at which the participant first started smoking cigarettes daily (current daily smokers).                                                                                                                                                                                                                                                          | -7. Not Applicable                                                                                                                                                                                                                                |
| SMK_CIG_DAILY_CUR_QTY               | Number of cigarettes smoked per day - current daily smokers                  | Number of cigarettes smoked per day (current daily smokers)                                                                                                                                                                                                                                                                                           | 1. 1-5 cigarettes smoked per day   2. 6-10 cigarettes smoked per day   3. 11-15 cigarettes smoked per day   4. 16-20 cigarettes smoked per day   5. 21-25 cigarettes smoked per day   6. 26 cigarettes or more smoked per day   7. Not Applicable |
| SMK_CIG_DAILY_CUR_QTY_26            | Number of cigarettes smoked per day if 26 or more - current daily smokers    | Number of cigarettes smoked per day if 26 or more (current daily smokers)                                                                                                                                                                                                                                                                             | -7. Not Applicable                                                                                                                                                                                                                                |
| SMK_CIG_EVER                        | Ever smoked 100 cigarettes or more                                           | Indicator of whether the participant has ever smoked at least 100 cigarettes during his lifetime.                                                                                                                                                                                                                                                     | 0. Never smoked at least 100 cigarettes   1. Ever smoked at least 100 cigarettes                                                                                                                                                                  |
| SMK_CIG_FORMER_DAILY                | Ever smoked cigarettes daily - current non-daily smokers                     | Indicator of whether the participant has ever smoked daily (current non-daily smokers)                                                                                                                                                                                                                                                                | 0. Never smoked daily   1. Ever smoked daily   7. Not Applicable                                                                                                                                                                                  |
| SMK_CIG_FORMER_DAILY_CESSATION      | Period since last smoked cigarettes daily - former daily smokers             | Indicator of the period since the participant stopped smoking daily (former daily smokers).                                                                                                                                                                                                                                                           | 1. Less than one year ago   2. 1-2 years ago   3. 3-5 years ago   4. More than five years ago   7. Not Applicable                                                                                                                                 |
| SMK_CIG_FORMER_DAILY_DUR            | Duration of daily cigarettes smoking - former daily smokers                  | Number of years the participant smoked daily (former daily smokers)                                                                                                                                                                                                                                                                                   | -7. Not Applicable                                                                                                                                                                                                                                |
| SMK_CIG_FORMER_DAILY_ONSET          | Age started smoking cigarettes daily - former daily smokers                  | Age at which the participant started smoking cigarettes daily (former daily smokers)                                                                                                                                                                                                                                                                  | -7. Not Applicable                                                                                                                                                                                                                                |
| SMK_CIG_FORMER_DAILY_QTY            | Number of cigarettes smoked per day - former daily smokers                   | Number of cigarettes smoked per day during the period the participant smoked daily (former daily smokers).                                                                                                                                                                                                                                            | 1. 1-5 cigarettes smoked per day   2. 6-10 cigarettes smoked per day   3. 11-15 cigarettes smoked per day   4. 16-20 cigarettes smoked per day   5. 21-25 cigarettes smoked per day   6. 26 cigarettes or more smoked per day   7. Not Applicable |
| SMK_CIG_FORMER_DAILY_QTY_26         | Number of cigarettes smoked per day, if 26 or more - former daily smokers    | Number of cigarettes smoked per day during the period the participant smoked daily, if more than 26 cigarettes (former daily smokers).                                                                                                                                                                                                                | -7. Not Applicable                                                                                                                                                                                                                                |

**Appendix 1 (as supplied by the authors): List of the Health and Risk Factor Questionnaire DataSchema variables (Version 2.0 - Oct. 2017)**

| Variable                | label                                                                                                         | Description                                                                                                                                                                                  | Categories                                                                                                                                                                                                                                         |
|-------------------------|---------------------------------------------------------------------------------------------------------------|----------------------------------------------------------------------------------------------------------------------------------------------------------------------------------------------|----------------------------------------------------------------------------------------------------------------------------------------------------------------------------------------------------------------------------------------------------|
| SMK_CIG_HEAVIEST_DUR    | Duration heaviest cigarettes consumption - current daily and former daily smokers                             | Duration of heaviest cigarettes smoking period (current daily or former daily smokers).                                                                                                      | -7. Not Applicable                                                                                                                                                                                                                                 |
| SMK_CIG_HEAVIEST_QTY    | Number of cigarettes smoked per day, heaviest quantity - current daily or former daily smokers                | During heaviest cigarette smoking period, number of cigarettes smoked per day (current daily or former daily smokers).                                                                       | 1. 1-5 cigarettes smoked per day   2. 6-10 cigarettes smoked per day   3. 11-15 cigarettes smoked per day   4. 16-20 cigarettes smoked per day   5. 21-25 cigarettes smoked per day   6. 26 cigarettes or more smoked per day   -7. Not Applicable |
| SMK_CIG_HEAVIEST_QTY_26 | Number of cigarettes smoked per day, heaviest quantity, if 26 or more - current daily or former daily smokers | During heaviest cigarettes smoking period, number of cigarettes smoked per day, if more than 26 cigarettes (current daily or former daily smokers).                                          | -7. Not Applicable                                                                                                                                                                                                                                 |
| SMK_CIG_LAST_AGE        | Age last smoked cigarettes on most days - current non-smokers                                                 | Age at which the participant last smoked cigarettes on most days (current non smokers).                                                                                                      | -7. Not Applicable                                                                                                                                                                                                                                 |
| SMK_CIG_OCC_CUR_FREQ    | One cigarette smoked frequency - current occasional smokers                                                   | Indicator of the frequency at which the participant has smoked at least one cigarette in the last 30 days (current occasional smokers).                                                      | 1. 1-5 days   2. 6-10 days   3. 11-20 days   4. 21-29 days   -7. Not Applicable                                                                                                                                                                    |
| SMK_CIG_OCC_CUR_QTY     | Number of cigarettes smoked per day - current occasional smokers                                              | Number of cigarettes smoked on a typical smoking day, over the past 30 days (current occasional smokers).                                                                                    | 1. 1-5 cigarettes smoked per day   2. 6-10 cigarettes smoked per day   3. 11-15 cigarettes smoked per day   4. 16-20 cigarettes smoked per day   5. 21-25 cigarettes smoked per day   6. 26 cigarettes or more smoked per day   -7. Not Applicable |
| SMK_CIG_STATUS          | Cigarettes smoking status                                                                                     | Indicator of participant cigarettes smoking status. A participant is considered a past smoker if he does not smoke currently but has ever smoked 100 cigarettes or more during his lifetime. | 0. Never smoked at least 100 cigarettes   1. Past smoker (Ever smoked at least 100 cigarettes)   2. Current occasional smoker   3. Current daily smoker                                                                                            |
| SMK_CIG_WHOLE_EVER      | Ever smoked a whole cigarette                                                                                 | Indicator of whether the participant has ever smoked a whole cigarette, if he hasn't smoked more than 100 cigarettes during his lifetime.                                                    | 0. Never smoked a whole cigarette   1. Ever smoked a whole cigarette   -7. Not Applicable                                                                                                                                                          |
| SMK_CIG_WHOLE_ONSET     | Age smoked a whole cigarette                                                                                  | Age of the participant when he first smoked a whole cigarette, if he hasn't smoked more than 100 cigarettes during his lifetime.                                                             | -7. Not Applicable                                                                                                                                                                                                                                 |
| SMK_GUM_CUR             | Currently uses nicotine gum                                                                                   | Indicator of whether the participant currently uses nicotine gum.                                                                                                                            | 0. Does not currently use nicotine gum   1. Currently uses nicotine gum                                                                                                                                                                            |
| SMK_GUM_EVER            | Ever used nicotine gum                                                                                        | Indicator of whether the participant has ever used nicotine gum on a regular basis for at least 6 months.                                                                                    | 0. Never used nicotine gum   1. Ever used nicotine gum                                                                                                                                                                                             |
| SMK_OTHER_TOB_CUR       | Currently uses other types of tobacco or nicotine products                                                    | Indicator of whether the participant currently uses other types of tobacco or nicotine products than those listed.                                                                           | 0. Does not currently use other type of tobacco   1. Currently uses other type of tobacco                                                                                                                                                          |
| SMK_OTHER_TOB_CUR_OTSP  | Other types of tobacco or nicotine products currently used, specify                                           | Name of the other types of tobacco or nicotine products currently used.                                                                                                                      | NA                                                                                                                                                                                                                                                 |
| SMK_OTHER_TOB_EVER      | Ever used other type of tobacco or nicotine products                                                          | Indicator of whether the participant has ever used other types of tobacco or nicotine products than those listed on regular basis for at least 6 months.                                     | 0. Never used other type of tobacco   1. Ever used other type of tobacco                                                                                                                                                                           |
| SMK_OTHER_TOB_EVER_OTSP | Other types of tobacco or nicotine products ever used, specify                                                | Name of the other types of tobacco or nicotine products ever used on a regular basis for at least 6 months.                                                                                  | NA                                                                                                                                                                                                                                                 |
| SMK_PAAAN_CUR           | Currently uses paan                                                                                           | Indicator of whether the participant currently uses paan.                                                                                                                                    | 0. Does not currently use paan   1. Currently use paan                                                                                                                                                                                             |
| SMK_PAAAN_EVER          | Ever used paan                                                                                                | Indicator of whether the participant has ever used paan on a regular basis for at least 6 months.                                                                                            | 0. Never used paan   1. Ever used paan                                                                                                                                                                                                             |
| SMK_PATCH_CUR           | Currently uses nicotine patches                                                                               | Indicator of whether the participant currently uses nicotine patches.                                                                                                                        | 0. Does not currently use nicotine patch   1. Currently use nicotine patch                                                                                                                                                                         |
| SMK_PATCH_EVER          | Ever used nicotine patches                                                                                    | Indicator of whether the participant has ever used nicotine patches on a regular basis for at least 6 months.                                                                                | 0. Never used nicotine patch   1. Ever used nicotine patch                                                                                                                                                                                         |
| SMK_PIPE_CUR            | Currently smokes pipes                                                                                        | Indicator of whether the participant currently smokes pipes.                                                                                                                                 | 0. Does not currently smoke pipe   1. Currently smokes pipe                                                                                                                                                                                        |
| SMK_PIPE_EVER           | Ever smoked pipes                                                                                             | Indicator of whether the participant has ever smoked pipes on a regular basis for at least 6 months.                                                                                         | 0. Never smoked pipe   1. Ever smoked pipe                                                                                                                                                                                                         |
| SMK_SHEESHA_CUR         | Currently smokes sheesha                                                                                      | Indicator of whether the participant currently smokes sheesha.                                                                                                                               | 0. Does not currently smoke sheesha   1. Currently smokes sheesha                                                                                                                                                                                  |
| SMK_SHEESHA_EVER        | Ever smoked sheesha                                                                                           | Indicator of whether the participant has ever smoked sheesha on a regular basis for at least 6 months.                                                                                       | 0. Never smoked sheesha   1. Ever smoked sheesha                                                                                                                                                                                                   |
| SMK_SMALL_CIGAR_CUR     | Currently smokes small cigars                                                                                 | Indicator of whether the participant currently smokes small cigars.                                                                                                                          | 0. Does not currently smoke small cigars   1. Currently smokes small cigars                                                                                                                                                                        |
| SMK_SMALL_CIGAR_EVER    | Ever smoked small cigars                                                                                      | Indicator of whether the participant has ever smoked small cigars on a regular basis for at least 6 months.                                                                                  | 0. Never smoked small cigars   1. Ever smoked small cigars                                                                                                                                                                                         |
| SMK_SNUFF_CUR           | Currently uses chewing tobacco or snuff                                                                       | Indicator of whether the participant currently uses chewing tobacco or snuff.                                                                                                                | 0. Does not currently use snuff   1. Currently uses snuff                                                                                                                                                                                          |
| SMK_SNUFF_EVER          | Ever used chewing tobacco or snuff                                                                            | Indicator of whether the participant has ever used chewing tobacco or snuff on a regular basis for at least 6 months.                                                                        | 0. Never used snuff   1. Ever used snuff                                                                                                                                                                                                           |

Appendix 1 (as supplied by the authors): List of the Health and Risk Factor Questionnaire DataSchema variables (Version 2.0 - Oct. 2017)

| Variable                            | label                                                          | Description                                                                                                                                                                                                    | Categories                                                                                                                                                                                                                                                                                                                                                                                                                                                                                                                                                                                                                                                                                                                                                                                                                                                                                                                                                                                                              |
|-------------------------------------|----------------------------------------------------------------|----------------------------------------------------------------------------------------------------------------------------------------------------------------------------------------------------------------|-------------------------------------------------------------------------------------------------------------------------------------------------------------------------------------------------------------------------------------------------------------------------------------------------------------------------------------------------------------------------------------------------------------------------------------------------------------------------------------------------------------------------------------------------------------------------------------------------------------------------------------------------------------------------------------------------------------------------------------------------------------------------------------------------------------------------------------------------------------------------------------------------------------------------------------------------------------------------------------------------------------------------|
| <b>Lifestyle behaviours-Alcohol</b> |                                                                |                                                                                                                                                                                                                |                                                                                                                                                                                                                                                                                                                                                                                                                                                                                                                                                                                                                                                                                                                                                                                                                                                                                                                                                                                                                         |
| ALC_BEER_WEEK                       | Current quantity of beer consumed per week                     | Average number of beers (one bottle, can or glass of 341 ml or 12 ounces) consumed by the participant during a typical week.                                                                                   | -7. Not Applicable                                                                                                                                                                                                                                                                                                                                                                                                                                                                                                                                                                                                                                                                                                                                                                                                                                                                                                                                                                                                      |
| ALC_BEER_WEEK_CAT                   | Current quantity of beer consumed per week - categorical       | Average number of beers (one bottle, can or glass of 341 ml or 12 ounces) consumed by the participant during a typical week.                                                                                   | 0. None to less than 1 drink   1. 1 drink to less than 2 drinks   2. 2 drinks to less than 3 drinks   3. 3 drinks to less than 4 drinks   4. 4 drinks to less than 5 drinks   5. 5 drinks to less than 6 drinks   6. 6 drinks to less than 7 drinks   7. 7 drinks to less than 8 drinks   8. 8 drinks to less than 9 drinks   9. 9 drinks to less than 10 drinks   10. 10 drinks to less than 11 drinks   11. 11 drinks to less than 12 drinks   12. 12 drinks to less than 13 drinks   13. 13 drinks to less than 14 drinks   14. 14 drinks to less than 15 drinks   15. 15 drinks to less than 16 drinks   16. 16 drinks to less than 17 drinks   17. 17 drinks to less than 18 drinks   18. 18 drinks to less than 19 drinks   19. 19 drinks to less than 20 drinks   20. 20 drinks to less than 21 drinks   21. 21 drinks to less than 22 drinks   22. 22 drinks to less than 23 drinks   23. 23 drinks to less than 24 drinks   24. 24 drinks to less than 25 drinks   25. 25 drinks and more   -7. Not Applicable |
| ALC_BEER_WKDAY                      | Current quantity of beer consumed on weekdays                  | In a typical week during the past 12 months, number of beers (one bottle, can or glass of 341 ml or 12 ounces) consumed by the participant on weekdays (Sunday to Thursday).                                   | -7. Not Applicable                                                                                                                                                                                                                                                                                                                                                                                                                                                                                                                                                                                                                                                                                                                                                                                                                                                                                                                                                                                                      |
| ALC_BEER_WKEND                      | Current quantity of beer consumed on weekend days              | In a typical week during the past 12 months, number of beers (one bottle, can or glass of 341 ml or 12 ounces) consumed by the participant on weekend days (Friday to Saturday).                               | -7. Not Applicable                                                                                                                                                                                                                                                                                                                                                                                                                                                                                                                                                                                                                                                                                                                                                                                                                                                                                                                                                                                                      |
| ALC_BINGE_FREQ_FEMALE               | Frequency of binge drinking - Female                           | Frequency of binge drinking for a female participant (4 drinks or more at the same occasion) in the past 12 months.                                                                                            | 0. Never   1. 1 to 5 times a year   2. 6 to 11 times a year   3. About once a month   4. 2 to 3 times a month   5. Once a week   6. 2 to 3 times a week   7. 4 to 5 times a week   8. 6 to 7 times a week   -7. Not Applicable                                                                                                                                                                                                                                                                                                                                                                                                                                                                                                                                                                                                                                                                                                                                                                                          |
| ALC_BINGE_FREQ_MALE                 | Frequency of binge drinking - Male                             | Frequency of binge drinking for a male participant (5 drinks or more at the same occasion) in the past 12 months.                                                                                              | 0. Never   1. 1 to 5 times a year   2. 6 to 11 times a year   3. About once a month   4. 2 to 3 times a month   5. Once a week   6. 2 to 3 times a week   7. 4 to 5 times a week   8. 6 to 7 times a week   -7. Not Applicable                                                                                                                                                                                                                                                                                                                                                                                                                                                                                                                                                                                                                                                                                                                                                                                          |
| ALC_CUR_FREQ                        | Current use of alcohol                                         | Frequency of alcohol consumption during the past 12 months.                                                                                                                                                    | 0. Never   1. Less than once a month   2. About once a month   3. 2 to 3 times a month   4. Once a week   5. 2 to 3 times a week   6. 4 to 5 times a week   7. 6 to 7 times a week   -7. Not Applicable                                                                                                                                                                                                                                                                                                                                                                                                                                                                                                                                                                                                                                                                                                                                                                                                                 |
| ALC_EVER                            | Ever alcohol consumption                                       | Indicator of whether the participant has ever consumed alcohol.                                                                                                                                                | 0. Never consumed alcohol   1. Ever consumed alcohol                                                                                                                                                                                                                                                                                                                                                                                                                                                                                                                                                                                                                                                                                                                                                                                                                                                                                                                                                                    |
| ALC_HEAVIEST_INTAKE                 | Current alcohol consumption compared to heaviest intake        | Current consumption of alcohol compared to the heaviest period of alcohol consumption.                                                                                                                         | 0. About the same   1. Less than heaviest period of drinking   -7. Not Applicable                                                                                                                                                                                                                                                                                                                                                                                                                                                                                                                                                                                                                                                                                                                                                                                                                                                                                                                                       |
| ALC_LIQUOR_WEEK                     | Current quantity of liquor consumed per week                   | Average number of drinks of liquor/spirits (one straight or mixed drink with 1 and 1/2 ounces of liquor) consumed by the participant during a typical week.                                                    | -7. Not Applicable                                                                                                                                                                                                                                                                                                                                                                                                                                                                                                                                                                                                                                                                                                                                                                                                                                                                                                                                                                                                      |
| ALC_LIQUOR_WEEK_CAT                 | Current quantity of liquor consumed per week - categorical     | Average number of drinks of liquor/spirits (one straight or mixed drink with 1 and 1/2 ounces of liquor) consumed by the participant during a typical week.                                                    | 0. None to less than 1 drink   1. 1 drink to less than 2 drinks   2. 2 drinks to less than 3 drinks   3. 3 drinks to less than 4 drinks   4. 4 drinks to less than 5 drinks   5. 5 drinks to less than 6 drinks   6. 6 drinks to less than 7 drinks   7. 7 drinks to less than 8 drinks   8. 8 drinks to less than 9 drinks   9. 9 drinks to less than 10 drinks   10. 10 drinks to less than 11 drinks   11. 11 drinks to less than 12 drinks   12. 12 drinks to less than 13 drinks   13. 13 drinks to less than 14 drinks   14. 14 drinks to less than 15 drinks   15. 15 drinks to less than 16 drinks   16. 16 drinks to less than 17 drinks   17. 17 drinks to less than 18 drinks   18. 18 drinks to less than 19 drinks   19. 19 drinks to less than 20 drinks   20. 20 drinks to less than 21 drinks   21. 21 drinks to less than 22 drinks   22. 22 drinks to less than 23 drinks   23. 23 drinks to less than 24 drinks   24. 24 drinks to less than 25 drinks   25. 25 drinks and more   -7. Not Applicable |
| ALC_LIQUOR_WKDAY                    | Current quantity of liquor or spirits consumed on weekdays     | In a typical week during the past 12 months, number of drinks of liquor/spirit (one straight or mixed drink with 1 and 1/2 ounces of liquor) consumed by the participant on weekdays (Sunday to Thursday).     | -7. Not Applicable                                                                                                                                                                                                                                                                                                                                                                                                                                                                                                                                                                                                                                                                                                                                                                                                                                                                                                                                                                                                      |
| ALC_LIQUOR_WKEND                    | Current quantity of liquor or spirits consumed on weekend days | In a typical week during the past 12 months, number of drinks of liquor/spirit (one straight or mixed drink with 1 and 1/2 ounces of liquor) consumed by the participant on weekend days (Friday to Saturday). | -7. Not Applicable                                                                                                                                                                                                                                                                                                                                                                                                                                                                                                                                                                                                                                                                                                                                                                                                                                                                                                                                                                                                      |
| ALC_OTHER_WEEK                      | Current quantity of other drink consumed                       | Average number of drinks of other kinds of alcohol (not beer, liquor/spirit or wine) consumed by the participant during a typical week.                                                                        | -7. Not Applicable                                                                                                                                                                                                                                                                                                                                                                                                                                                                                                                                                                                                                                                                                                                                                                                                                                                                                                                                                                                                      |
| ALC_OTHER_WEEK_CAT                  | Current quantity of other drink consumed - categorical         | Average number of drinks of other kinds of alcohol (not beer, liquor/spirit or wine) consumed by the participant during a typical week.                                                                        | 0. None to less than 1 drink   1. 1 drink to less than 2 drinks   2. 2 drinks to less than 3 drinks   3. 3 drinks to less than 4 drinks   4. 4 drinks to less than 5 drinks   5. 5 drinks to less than 6 drinks   6. 6 drinks to less than 7 drinks   7. 7 drinks to less than 8 drinks   8. 8 drinks to less than 9 drinks   9. 9 drinks to less than 10 drinks   10. 10 drinks to less than 11 drinks   11. 11 drinks to less than 12 drinks   12. 12 drinks to less than 13 drinks   13. 13 drinks to less than 14 drinks   14. 14 drinks to less than 15 drinks   15. 15 drinks to less than 16 drinks   16. 16 drinks to less than 17 drinks   17. 17 drinks to less than 18 drinks   18. 18 drinks to less than 19 drinks   19. 19 drinks to less than 20 drinks   20. 20 drinks to less than 21 drinks   21. 21 drinks to less than 22 drinks   22. 22 drinks to less than 23 drinks   23. 23 drinks to less than 24 drinks   24. 24 drinks to less than 25 drinks   25. 25 drinks and more   -7. Not Applicable |



**Appendix 1 (as supplied by the authors): List of the Health and Risk Factor Questionnaire DataSchema variables (Version 2.0 - Oct. 2017)**

| Variable                              | label                                                                | Description                                                                                                                                                                                 | Categories                                                                                                                                                                                                                                                                                                                                                                                                                                                                                                                                                                                                                                                                                                                                                                                                                                                                                                                                                                                                              |
|---------------------------------------|----------------------------------------------------------------------|---------------------------------------------------------------------------------------------------------------------------------------------------------------------------------------------|-------------------------------------------------------------------------------------------------------------------------------------------------------------------------------------------------------------------------------------------------------------------------------------------------------------------------------------------------------------------------------------------------------------------------------------------------------------------------------------------------------------------------------------------------------------------------------------------------------------------------------------------------------------------------------------------------------------------------------------------------------------------------------------------------------------------------------------------------------------------------------------------------------------------------------------------------------------------------------------------------------------------------|
| ALC_OTHER_WKDAY                       | Current quantity of other kind of alcohol consumed on weekdays       | In a typical week during the past 12 months, number of drinks of other kinds of alcohol (not beer, liquor/spirit or wine) consumed by the participant on weekdays (Sunday to Thursday).     | -7. Not Applicable                                                                                                                                                                                                                                                                                                                                                                                                                                                                                                                                                                                                                                                                                                                                                                                                                                                                                                                                                                                                      |
| ALC_OTHER_WKEND                       | Current quantity of other kind of alcohol consumed on weekend days   | In a typical week during the past 12 months, number of drinks of other kinds of alcohol (not beer, liquor/spirit or wine) consumed by the participant on weekend days (Friday to Saturday). | -7. Not Applicable                                                                                                                                                                                                                                                                                                                                                                                                                                                                                                                                                                                                                                                                                                                                                                                                                                                                                                                                                                                                      |
| ALC_RED_WINE_WEEK                     | Current quantity of red wine consumed per week                       | Average number of glasses of red wine (one glass of 142 mL or 5 ounces) consumed by the participant during a typical week.                                                                  | -7. Not Applicable                                                                                                                                                                                                                                                                                                                                                                                                                                                                                                                                                                                                                                                                                                                                                                                                                                                                                                                                                                                                      |
| ALC_RED_WINE_WEEK_CAT                 | Current quantity of red wine consumed per week - categorical         | Average number of glasses of red wine (one glass of 142 mL or 5 ounces) consumed by the participant during a typical week.                                                                  | 0. None to less than 1 drink   1. 1 drink to less than 2 drinks   2. 2 drinks to less than 3 drinks   3. 3 drinks to less than 4 drinks   4. 4 drinks to less than 5 drinks   5. 5 drinks to less than 6 drinks   6. 6 drinks to less than 7 drinks   7. 7 drinks to less than 8 drinks   8. 8 drinks to less than 9 drinks   9. 9 drinks to less than 10 drinks   10. 10 drinks to less than 11 drinks   11. 11 drinks to less than 12 drinks   12. 12 drinks to less than 13 drinks   13. 13 drinks to less than 14 drinks   14. 14 drinks to less than 15 drinks   15. 15 drinks to less than 16 drinks   16. 16 drinks to less than 17 drinks   17. 17 drinks to less than 18 drinks   18. 18 drinks to less than 19 drinks   19. 19 drinks to less than 20 drinks   20. 20 drinks to less than 21 drinks   21. 21 drinks to less than 22 drinks   22. 22 drinks to less than 23 drinks   23. 23 drinks to less than 24 drinks   24. 24 drinks to less than 25 drinks   25. 25 drinks and more   -7. Not Applicable |
| ALC_RED_WINE_WKDAY                    | Current quantity of red wine consumed on weekdays                    | In a typical week during the past 12 months, number of glasses of red wine (one glass of 142 mL or 5 ounces) consumed by the participant on weekdays (Sunday to Thursday).                  | -7. Not Applicable                                                                                                                                                                                                                                                                                                                                                                                                                                                                                                                                                                                                                                                                                                                                                                                                                                                                                                                                                                                                      |
| ALC_RED_WINE_WKEND                    | Current quantity of red wine consumed on weekend days                | In a typical week during the past 12 months, number of glasses of red wine (one glass of 142 mL or 5 ounces) consumed by the participant on weekend days (Friday to Saturday).              | -7. Not Applicable                                                                                                                                                                                                                                                                                                                                                                                                                                                                                                                                                                                                                                                                                                                                                                                                                                                                                                                                                                                                      |
| ALC_WHITE_WINE_WEEK                   | Current quantity of white wine consumed per week                     | Average number of glasses of white wine (one glass of 142 mL or 5 ounces) consumed by the participant during a typical week.                                                                | -7. Not Applicable                                                                                                                                                                                                                                                                                                                                                                                                                                                                                                                                                                                                                                                                                                                                                                                                                                                                                                                                                                                                      |
| ALC_WHITE_WINE_WEEK_CAT               | Current quantity of white wine consumed per week - categorical       | Average number of glasses of white wine (one glass of 142 mL or 5 ounces) consumed by the participant during a typical week.                                                                | 0. None to less than 1 drink   1. 1 drink to less than 2 drinks   2. 2 drinks to less than 3 drinks   3. 3 drinks to less than 4 drinks   4. 4 drinks to less than 5 drinks   5. 5 drinks to less than 6 drinks   6. 6 drinks to less than 7 drinks   7. 7 drinks to less than 8 drinks   8. 8 drinks to less than 9 drinks   9. 9 drinks to less than 10 drinks   10. 10 drinks to less than 11 drinks   11. 11 drinks to less than 12 drinks   12. 12 drinks to less than 13 drinks   13. 13 drinks to less than 14 drinks   14. 14 drinks to less than 15 drinks   15. 15 drinks to less than 16 drinks   16. 16 drinks to less than 17 drinks   17. 17 drinks to less than 18 drinks   18. 18 drinks to less than 19 drinks   19. 19 drinks to less than 20 drinks   20. 20 drinks to less than 21 drinks   21. 21 drinks to less than 22 drinks   22. 22 drinks to less than 23 drinks   23. 23 drinks to less than 24 drinks   24. 24 drinks to less than 25 drinks   25. 25 drinks and more   -7. Not Applicable |
| ALC_WHITE_WINE_WKDAY                  | Current quantity of white wine consumed on weekdays                  | In a typical week during the past 12 months, number of glasses of white wine (one glass of 142 mL or 5 ounces) consumed by the participant on weekdays (Sunday to Thursday).                | -7. Not Applicable                                                                                                                                                                                                                                                                                                                                                                                                                                                                                                                                                                                                                                                                                                                                                                                                                                                                                                                                                                                                      |
| ALC_WHITE_WINE_WKEND                  | Current quantity of white wine consumed on weekend days              | In a typical week during the past 12 months, number of glasses of white wine (one glass of 142 mL or 5 ounces) consumed by the participant on weekend days (Friday to Saturday).            | -7. Not Applicable                                                                                                                                                                                                                                                                                                                                                                                                                                                                                                                                                                                                                                                                                                                                                                                                                                                                                                                                                                                                      |
| ALC_WKEND                             | Alcohol mostly drank on weekend days                                 | Indicator of whether the participant currently consumes alcohol mostly on weekend (or non working) days.                                                                                    | 0. Alcohol not mostly drank on weekend   1. Alcohol mostly drank on weekend   -7. Not Applicable                                                                                                                                                                                                                                                                                                                                                                                                                                                                                                                                                                                                                                                                                                                                                                                                                                                                                                                        |
| <b>Lifestyle behaviours-Nutrition</b> |                                                                      |                                                                                                                                                                                             |                                                                                                                                                                                                                                                                                                                                                                                                                                                                                                                                                                                                                                                                                                                                                                                                                                                                                                                                                                                                                         |
| NUT_FRUITS_QTY                        | Quantity of fruits consumed                                          | Total number of fruit servings (about 1/2 cup) consumed in a typical day.                                                                                                                   | NA                                                                                                                                                                                                                                                                                                                                                                                                                                                                                                                                                                                                                                                                                                                                                                                                                                                                                                                                                                                                                      |
| NUT_FRUITS_QTY_CAT                    | Quantity of fruits consumed - categorical                            | otal number of fruit servings (about 1/2 cup) consumed in a typical day.                                                                                                                    | 0. No serving   1. 1 serving   2. 2 servings   3. 3 servings   4. 4 servings   5. 5 servings   6. 6 servings   7. 7 servings   8. 8 servings   9. 9 servings   10. 10 servings and more                                                                                                                                                                                                                                                                                                                                                                                                                                                                                                                                                                                                                                                                                                                                                                                                                                 |
| NUT_JUICE_QTY                         | Quantity of 100 percent fruit-vegetable juice consumed               | Total number of 100 percent fruit or vegetable juice servings (125 mL or 1/2 cup) consumed in a typical day.                                                                                | NA                                                                                                                                                                                                                                                                                                                                                                                                                                                                                                                                                                                                                                                                                                                                                                                                                                                                                                                                                                                                                      |
| NUT_JUICE_QTY_CAT                     | Quantity of 100 percent fruit-vegetable juice consumed - categorical | Total number of 100 percent fruit or vegetable juice servings (125 mL or 1/2 cup) consumed in a typical day.                                                                                | 0. No serving   1. 1 serving   2. 2 servings   3. 3 servings   4. 4 servings   5. 5 servings   6. 6 servings   7. 7 servings   8. 8 servings   9. 9 servings   10. 10 servings and more                                                                                                                                                                                                                                                                                                                                                                                                                                                                                                                                                                                                                                                                                                                                                                                                                                 |
| NUT_VEG_QTY                           | Quantity of vegetables consumed                                      | Total number of vegetable servings (about 1/2 cup or 125mL) consumed in a typical day.                                                                                                      | NA                                                                                                                                                                                                                                                                                                                                                                                                                                                                                                                                                                                                                                                                                                                                                                                                                                                                                                                                                                                                                      |
| NUT_VEG_QTY_CAT                       | Quantity of vegetables consumed - categorical                        | Total number of vegetable servings (about 1/2 cup or 125mL) consumed in a typical day.                                                                                                      | 0. No serving   1. 1 serving   2. 2 servings   3. 3 servings   4. 4 servings   5. 5 servings   6. 6 servings   7. 7 servings   8. 8 servings   9. 9 servings   10. 10 servings and more                                                                                                                                                                                                                                                                                                                                                                                                                                                                                                                                                                                                                                                                                                                                                                                                                                 |
| <b>Lifestyle behaviours-Sleep</b>     |                                                                      |                                                                                                                                                                                             |                                                                                                                                                                                                                                                                                                                                                                                                                                                                                                                                                                                                                                                                                                                                                                                                                                                                                                                                                                                                                         |
| SLE_LIGHT_EXP                         | Exposure to light at night                                           | Average quantity of light entering the room of the participant when he/she is sleeping.                                                                                                     | 0. Virtually no light   1. Some light   2. A lot of light                                                                                                                                                                                                                                                                                                                                                                                                                                                                                                                                                                                                                                                                                                                                                                                                                                                                                                                                                               |
| SLE_TIME                              | Number of minutes usually slept                                      | Number of minutes per day the participant usually sleeps, including naps.                                                                                                                   | NA                                                                                                                                                                                                                                                                                                                                                                                                                                                                                                                                                                                                                                                                                                                                                                                                                                                                                                                                                                                                                      |

**Appendix 1 (as supplied by the authors): List of the Health and Risk Factor Questionnaire DataSchema variables (Version 2.0 - Oct. 2017)**

| Variable                                                      | label                                                      | Description                                                                                      | Categories                                                                                                                                                                                                                                                                                                                                              |
|---------------------------------------------------------------|------------------------------------------------------------|--------------------------------------------------------------------------------------------------|---------------------------------------------------------------------------------------------------------------------------------------------------------------------------------------------------------------------------------------------------------------------------------------------------------------------------------------------------------|
| SLE_TIME_CAT                                                  | Number of minutes usually slept - categorical              | Number of minutes per day the participant usually sleeps, including naps.                        | 1. Less than 3 hours   2. 3 to less than 4 hours   3. 4 to less than 5 hours   4. 5 to less than 6 hours   5. 6 to less than 7 hours   6. 7 to less than 8 hours   7. 8 to less than 9 hours   8. 9 to less than 10 hours   9. 10 to less than 11 hours   10. 11 to less than 12 hours   11. 12 hours and more                                          |
| SLE_TROUBLE_FREQ                                              | Frequency trouble to sleep                                 | Frequency of sleeping troubles (trouble going to sleep or staying asleep).                       | 0. None of the time   1. A little of the time   2. Some of the time   3. Most of the time   4. All of the time                                                                                                                                                                                                                                          |
| <b>Health status functional limitations-Perception health</b> |                                                            |                                                                                                  |                                                                                                                                                                                                                                                                                                                                                         |
| HS_GEN_HEALTH                                                 | Perception of health                                       | Participant's general perception of his/her health.                                              | 1. Poor   2. Fair   3. Good   4. Very good   5. Excellent                                                                                                                                                                                                                                                                                               |
| <b>Diseases-Neoplasm</b>                                      |                                                            |                                                                                                  |                                                                                                                                                                                                                                                                                                                                                         |
| DIS_CANCER1                                                   | Cancer 1: Type                                             | Type of cancer diagnosed.                                                                        | 1. Breast   2. Colon   3. Bronchus and Lung   4. Liver   5. Prostate   6. Ovary   7. Pancreas   8. Stomach   9. Esophagus   10. Larynx   11. Trachea   12. Rectum   13. Skin   14. Cervix   15. Uterus   16. Kidney   17. Bladder   18. Brain   19. Thyroid   20. Non-Hodgkin's Lymphoma   21. Leukemia   22. Other type of cancer   -7. Not Applicable |
| DIS_CANCER1_AGE                                               | Cancer 1: Age at first diagnosis                           | Age of the participant at cancer first diagnosis.                                                | -7. Not Applicable                                                                                                                                                                                                                                                                                                                                      |
| DIS_CANCER1_OTSP                                              | Cancer 1: Type, other specify                              | Name of other type of cancer diagnosed.                                                          | NA                                                                                                                                                                                                                                                                                                                                                      |
| DIS_CANCER1_TX                                                | Cancer 1: Ever treated                                     | Indicator of whether the participant ever received a treatment for the cancer diagnosed.         | 0. Never received a treatment for this cancer   1. Ever received a treatment for this cancer   2. Presumed - Never received treatment for this cancer   -7. Not Applicable                                                                                                                                                                              |
| DIS_CANCER1_TX_CHEMO                                          | Cancer 1: Ever treated with chemotherapy                   | Indicator of whether the participant ever received chemotherapy for the cancer diagnosed.        | 1. Ever had chemotherapy for this cancer   -7. Not Applicable                                                                                                                                                                                                                                                                                           |
| DIS_CANCER1_TX_OTHER                                          | Cancer 1: Ever treated with other treatment                | Indicator of whether the participant ever received other treatments for the cancer diagnosed.    | 1. Ever had other type of treatment for this cancer   -7. Not Applicable                                                                                                                                                                                                                                                                                |
| DIS_CANCER1_TX_OTSP                                           | Cancer 1: Ever treated with other treatment, other specify | Name of the other treatment received for the cancer diagnosed.                                   | NA                                                                                                                                                                                                                                                                                                                                                      |
| DIS_CANCER1_TX_RAD                                            | Cancer 1: Ever treated with radiation                      | Indicator of whether the participant ever received radiation treatment for the cancer diagnosed. | 1. Ever had radiation for this cancer   -7. Not Applicable                                                                                                                                                                                                                                                                                              |
| DIS_CANCER1_TX_SURG                                           | Cancer 1: Ever treated with surgery                        | Indicator of whether the participant ever had a surgery for the cancer diagnosed.                | 1. Ever had surgery for this cancer   -7. Not Applicable                                                                                                                                                                                                                                                                                                |
| DIS_CANCER2                                                   | Cancer 2: Type                                             | Type of cancer diagnosed.                                                                        | 1. Breast   2. Colon   3. Bronchus and Lung   4. Liver   5. Prostate   6. Ovary   7. Pancreas   8. Stomach   9. Esophagus   10. Larynx   11. Trachea   12. Rectum   13. Skin   14. Cervix   15. Uterus   16. Kidney   17. Bladder   18. Brain   19. Thyroid   20. Non-Hodgkin's Lymphoma   21. Leukemia   22. Other type of cancer   -7. Not Applicable |
| DIS_CANCER2_AGE                                               | Cancer 2: Age at first diagnosis                           | Age of the participant at cancer first diagnosis.                                                | -7. Not Applicable                                                                                                                                                                                                                                                                                                                                      |
| DIS_CANCER2_OTSP                                              | Cancer 2: Type, other specify                              | Name of other type of cancer diagnosed.                                                          | NA                                                                                                                                                                                                                                                                                                                                                      |
| DIS_CANCER2_TX                                                | Cancer 2: Ever treated                                     | Indicator of whether the participant ever received a treatment for the cancer diagnosed.         | 0. Never received a treatment for this cancer   1. Ever received a treatment for this cancer   2. Presumed - Never received treatment for this cancer   -7. Not Applicable                                                                                                                                                                              |
| DIS_CANCER2_TX_CHEMO                                          | Cancer 2: Ever treated with chemotherapy                   | Indicator of whether the participant ever received chemotherapy for the cancer diagnosed.        | 1. Ever had chemotherapy for this cancer   -7. Not Applicable                                                                                                                                                                                                                                                                                           |
| DIS_CANCER2_TX_OTHER                                          | Cancer 2: Ever treated with other treatment                | Indicator of whether the participant ever received other treatments for the cancer diagnosed.    | 1. Ever had other type of treatment for this cancer   -7. Not Applicable                                                                                                                                                                                                                                                                                |
| DIS_CANCER2_TX_OTSP                                           | Cancer 2: Ever treated with other treatment, other specify | Name of the other treatment received for the cancer diagnosed.                                   | NA                                                                                                                                                                                                                                                                                                                                                      |
| DIS_CANCER2_TX_RAD                                            | Cancer 2: Ever treated with radiation                      | Indicator of whether the participant ever received radiation treatment for the cancer diagnosed. | 1. Ever had radiation for this cancer   -7. Not Applicable                                                                                                                                                                                                                                                                                              |
| DIS_CANCER2_TX_SURG                                           | Cancer 2: Ever treated with surgery                        | Indicator of whether the participant ever had a surgery for the cancer diagnosed.                | 1. Ever had surgery for this cancer   -7. Not Applicable                                                                                                                                                                                                                                                                                                |
| DIS_CANCER3                                                   | Cancer 3: Type                                             | Type of cancer diagnosed.                                                                        | 1. Breast   2. Colon   3. Bronchus and Lung   4. Liver   5. Prostate   6. Ovary   7. Pancreas   8. Stomach   9. Esophagus   10. Larynx   11. Trachea   12. Rectum   13. Skin   14. Cervix   15. Uterus   16. Kidney   17. Bladder   18. Brain   19. Thyroid   20. Non-Hodgkin's Lymphoma   21. Leukemia   22. Other type of cancer   -7. Not Applicable |
| DIS_CANCER3_AGE                                               | Cancer 3: Age at first diagnosis                           | Age of the participant at cancer first diagnosis.                                                | -7. Not Applicable                                                                                                                                                                                                                                                                                                                                      |
| DIS_CANCER3_OTSP                                              | Cancer 3: Type, other specify                              | Name of other type of cancer diagnosed.                                                          | NA                                                                                                                                                                                                                                                                                                                                                      |
| DIS_CANCER3_TX                                                | Cancer 3: Ever treated                                     | Indicator of whether the participant ever received a treatment for the cancer diagnosed.         | 0. Never received a treatment for this cancer   1. Ever received a treatment for this cancer   2. Presumed - Never received treatment for this cancer   -7. Not Applicable                                                                                                                                                                              |
| DIS_CANCER3_TX_CHEMO                                          | Cancer 3: Ever treated with chemotherapy                   | Indicator of whether the participant ever received chemotherapy for the cancer diagnosed.        | 1. Ever had chemotherapy for this cancer   -7. Not Applicable                                                                                                                                                                                                                                                                                           |
| DIS_CANCER3_TX_OTHER                                          | Cancer 3: Ever treated with other treatment                | Indicator of whether the participant ever received other treatments for the cancer diagnosed.    | 1. Ever had other type of treatment for this cancer   -7. Not Applicable                                                                                                                                                                                                                                                                                |
| DIS_CANCER3_TX_OTSP                                           | Cancer 3: Ever treated with other treatment, other specify | Name of the other treatment received for the cancer diagnosed.                                   | NA                                                                                                                                                                                                                                                                                                                                                      |
| DIS_CANCER3_TX_RAD                                            | Cancer 3: Ever treated with radiation                      | Indicator of whether the participant ever received radiation treatment for the cancer diagnosed. | 1. Ever had radiation for this cancer   -7. Not Applicable                                                                                                                                                                                                                                                                                              |
| DIS_CANCER3_TX_SURG                                           | Cancer 3: Ever treated with surgery                        | Indicator of whether the participant ever had a surgery for the cancer diagnosed.                | 1. Ever had surgery for this cancer   -7. Not Applicable                                                                                                                                                                                                                                                                                                |
| DIS_CANCER4                                                   | Cancer 4: Type                                             | Type of cancer diagnosed.                                                                        | 1. Breast   2. Colon   3. Bronchus and Lung   4. Liver   5. Prostate   6. Ovary   7. Pancreas   8. Stomach   9. Esophagus   10. Larynx   11. Trachea   12. Rectum   13. Skin   14. Cervix   15. Uterus   16. Kidney   17. Bladder   18. Brain   19. Thyroid   20. Non-Hodgkin's Lymphoma   21. Leukemia   22. Other type of cancer   -7. Not Applicable |

**Appendix 1 (as supplied by the authors): List of the Health and Risk Factor Questionnaire DataSchema variables (Version 2.0 - Oct. 2017)**

| Variable                       | label                                       | Description                                                                                                        | Categories                                                                                                                                                                   |
|--------------------------------|---------------------------------------------|--------------------------------------------------------------------------------------------------------------------|------------------------------------------------------------------------------------------------------------------------------------------------------------------------------|
| DIS_CANCER4_AGE                | Cancer 4: Age at first diagnosis            | Age of the participant at cancer first diagnosis.                                                                  | -7. Not Applicable                                                                                                                                                           |
| DIS_CANCER4_OTSP               | Cancer 4: Type, other specify               | Name of other type of cancer diagnosed.                                                                            | NA                                                                                                                                                                           |
| DIS_CANCER4_TX                 | Cancer 4: Ever treated                      | Indicator of whether the participant ever received a treatment for the cancer diagnosed.                           | 0. Never received a treatment for this cancer   1. Ever received a treatment for this cancer   2. Presumed - Never received a treatment for this cancer   -7. Not Applicable |
| DIS_CANCER4_TX_CHEMO           | Cancer 4: Ever treated with chemotherapy    | Indicator of whether the participant ever received chemotherapy for the cancer diagnosed.                          | 1. Ever had chemotherapy for this cancer   -7. Not Applicable                                                                                                                |
| DIS_CANCER4_TX_OTHER           | Cancer 4: Ever treated with other treatment | Indicator of whether the participant ever received other treatments for the cancer diagnosed.                      | 1. Ever had other type of treatment for this cancer   -7. Not Applicable                                                                                                     |
| DIS_CANCER4_TX_RAD             | Cancer 4: Ever treated with radiation       | Indicator of whether the participant ever received radiation treatment for the cancer diagnosed.                   | 1. Ever had radiation for this cancer   -7. Not Applicable                                                                                                                   |
| DIS_CANCER4_TX_SURG            | Cancer 4: Ever treated with surgery         | Indicator of whether the participant ever had a surgery for the cancer diagnosed.                                  | 1. Ever had surgery for this cancer   -7. Not Applicable                                                                                                                     |
| DIS_CANCER_CHILD_BLADDER       | Children bladder cancer                     | Occurrence of bladder cancer at any point during the life of the biological children of the participant.           | 1. Ever had bladder cancer                                                                                                                                                   |
| DIS_CANCER_CHILD_BLADDER_NUM   | Number of children with bladder cancer      | Total number of participant's biological children that have ever had bladder cancer.                               | NA                                                                                                                                                                           |
| DIS_CANCER_CHILD_BRAIN         | Children brain cancer                       | Occurrence of brain cancer at any point during the life of the biological children of the participant.             | 1. Ever had brain cancer                                                                                                                                                     |
| DIS_CANCER_CHILD_BRAIN_NUM     | Number of children with brain cancer        | Total number of participant's biological children that have ever had brain cancer.                                 | NA                                                                                                                                                                           |
| DIS_CANCER_CHILD_BREAST        | Children breast cancer                      | Occurrence of breast cancer at any point during the life of the biological children of the participant.            | 1. Ever had breast cancer                                                                                                                                                    |
| DIS_CANCER_CHILD_BREAST_NUM    | Number of children with breast cancer       | Total number of participant's biological children that have ever had breast cancer.                                | NA                                                                                                                                                                           |
| DIS_CANCER_CHILD_CERVIX        | Children cervical cancer                    | Occurrence of cervical cancer at any point during the life of the biological children of the participant.          | 1. Ever had cervical cancer                                                                                                                                                  |
| DIS_CANCER_CHILD_CERVIX_NUM    | Number of children with cervical cancer     | Total number of participant's biological children that have ever had cervical cancer.                              | NA                                                                                                                                                                           |
| DIS_CANCER_CHILD_COLON         | Children colon cancer                       | Occurrence of colon cancer at any point during the life of the biological children of the participant.             | 1. Ever had colon cancer                                                                                                                                                     |
| DIS_CANCER_CHILD_COLON_NUM     | Number of children with colon cancer        | Total number of participant's biological children that have ever had colon cancer.                                 | NA                                                                                                                                                                           |
| DIS_CANCER_CHILD_ESOPHAGUS     | Children esophageal cancer                  | Occurrence of esophageal cancer at any point during the life of the biological children of the participant.        | 1. Ever had esophageal cancer                                                                                                                                                |
| DIS_CANCER_CHILD_ESOPHAGUS_NUM | Number of children with esophageal cancer   | Total number of participant's biological children that have ever had esophageal cancer.                            | NA                                                                                                                                                                           |
| DIS_CANCER_CHILD_EVER          | Lifetime occurrence of cancer in children   | Occurrence of cancer at any point during the life of the participant's biological children.                        | 0. No child had cancer   1. At least one child has had cancer                                                                                                                |
| DIS_CANCER_CHILD_KIDNEY        | Children kidney cancer                      | Occurrence of kidney cancer at any point during the life of the biological children of the participant.            | 1. Ever had kidney cancer                                                                                                                                                    |
| DIS_CANCER_CHILD_KIDNEY_NUM    | Number of children with kidney cancer       | Total number of participant's biological children that have ever had kidney cancer.                                | NA                                                                                                                                                                           |
| DIS_CANCER_CHILD_LARYNX        | Children laryngeal cancer                   | Occurrence of laryngeal cancer at any point during the life of the biological children of the participant.         | 1. Ever had laryngeal cancer                                                                                                                                                 |
| DIS_CANCER_CHILD_LARYNX_NUM    | Number of children with laryngeal cancer    | Total number of participant's biological children that have ever had laryngeal cancer.                             | NA                                                                                                                                                                           |
| DIS_CANCER_CHILD_LEUKEMIA      | Children leukemia                           | Occurrence of leukemia at any point during the life of the biological children of the participant.                 | 1. Ever had leukemia                                                                                                                                                         |
| DIS_CANCER_CHILD_LEUKEMIA_NUM  | Number of children with leukemia            | Total number of participant's biological children that have ever had leukemia.                                     | NA                                                                                                                                                                           |
| DIS_CANCER_CHILD_LIVER         | Children liver cancer                       | Occurrence of liver cancer at any point during the life of the biological children of the participant.             | 1. Ever had liver cancer                                                                                                                                                     |
| DIS_CANCER_CHILD_LIVER_NUM     | Number of children with liver cancer        | Total number of participant's biological children that have ever had liver cancer.                                 | NA                                                                                                                                                                           |
| DIS_CANCER_CHILD_LUNG          | Children lung cancer                        | Occurrence of lung and bronchus cancer at any point during the life of the biological children of the participant. | 1. Ever had lung and bronchus cancer                                                                                                                                         |
| DIS_CANCER_CHILD_LUNG_NUM      | Number of children with lung cancer         | Total number of participant's biological children that have ever had lung and bronchus cancer.                     | NA                                                                                                                                                                           |
| DIS_CANCER_CHILD_LYMPHOMA      | Children lymphoma                           | Occurrence of lymphoma at any point during the life of the biological children of the participant.                 | 1. Ever had lymphoma                                                                                                                                                         |
| DIS_CANCER_CHILD_LYMPHOMA_NUM  | Number of children with lymphoma            | Total number of participant's biological children that have ever had lymphoma.                                     | NA                                                                                                                                                                           |
| DIS_CANCER_CHILD_NHL           | Children non-Hodgkin's lymphoma             | Occurrence of non-Hodgkin's lymphoma at any point during the life of the biological children of the participant.   | 1. Ever had non-Hodgkin's lymphoma                                                                                                                                           |

**Appendix 1 (as supplied by the authors): List of the Health and Risk Factor Questionnaire DataSchema variables (Version 2.0 - Oct. 2017)**

| Variable                      | label                                          | Description                                                                                                                 | Categories                                                   |
|-------------------------------|------------------------------------------------|-----------------------------------------------------------------------------------------------------------------------------|--------------------------------------------------------------|
| DIS_CANCER_CHILD_NHL_NUM      | Number of children with non-Hodgkin's lymphoma | Total number of participant's biological children that have ever had non-Hodgkin's lymphoma.                                | NA                                                           |
| DIS_CANCER_CHILD_OTHER        | Children other cancer                          | Occurrence of other cancer than those listed at any point during the life of the biological children of the participant.    | 1. Ever had other cancer                                     |
| DIS_CANCER_CHILD_OTHER_NUM    | Number of children with other cancer           | Total number of participant's biological children that have ever had other cancer than those listed.                        | NA                                                           |
| DIS_CANCER_CHILD_OTSP         | Children cancer, other specify                 | Name of other type of cancer than those listed occurring at any point during the life of participant's biological children. | NA                                                           |
| DIS_CANCER_CHILD_OVARY        | Children ovarian cancer                        | Occurrence of ovarian cancer at any point during the life of the biological children of the participant.                    | 1. Ever had ovarian cancer                                   |
| DIS_CANCER_CHILD_OVARY_NUM    | Number of children with ovarian cancer         | Total number of participant's biological children that have ever had ovarian cancer.                                        | NA                                                           |
| DIS_CANCER_CHILD_PANCREAS     | Children pancreatic cancer                     | Occurrence of pancreatic cancer at any point during the life of the biological children of the participant.                 | 1. Ever had pancreatic cancer                                |
| DIS_CANCER_CHILD_PANCREAS_NUM | Number of children with pancreatic cancer      | Total number of participant's biological children that have ever had pancreatic cancer.                                     | NA                                                           |
| DIS_CANCER_CHILD_PROSTATE     | Children prostate cancer                       | Occurrence of prostate cancer at any point during the life of the biological children of the participant.                   | 1. Ever had prostate cancer                                  |
| DIS_CANCER_CHILD_PROSTATE_NUM | Number of children with prostate cancer        | Total number of participant's biological children that have ever had prostate cancer.                                       | NA                                                           |
| DIS_CANCER_CHILD_RECTUM       | Children rectal cancer                         | Occurrence of rectal cancer at any point during the life of the biological children of the participant.                     | 1. Ever had rectal cancer                                    |
| DIS_CANCER_CHILD_RECTUM_NUM   | Number of children with rectal cancer          | Total number of participant's biological children that have ever had rectal cancer.                                         | NA                                                           |
| DIS_CANCER_CHILD_SKIN         | Children skin cancer                           | Occurrence of skin cancer at any point during the life of the biological children of the participant.                       | 1. Ever had skin cancer                                      |
| DIS_CANCER_CHILD_SKIN_NUM     | Number of children with skin cancer            | Total number of participant's biological children that have ever had skin cancer.                                           | NA                                                           |
| DIS_CANCER_CHILD_STOMACH      | Children stomach cancer                        | Occurrence of stomach cancer at any point during the life of the biological children of the participant.                    | 1. Ever had stomach cancer                                   |
| DIS_CANCER_CHILD_STOMACH_NUM  | Number of children with stomach cancer         | Total number of participant's biological children that have ever had stomach cancer.                                        | NA                                                           |
| DIS_CANCER_CHILD_THYROID      | Children thyroid cancer                        | Occurrence of thyroid cancer at any point during the life of the biological children of the participant.                    | 1. Ever had thyroid cancer                                   |
| DIS_CANCER_CHILD_THYROID_NUM  | Number of children with thyroid cancer         | Total number of participant's biological children that have ever had thyroid cancer.                                        | NA                                                           |
| DIS_CANCER_CHILD_TRACHEA      | Children tracheal cancer                       | Occurrence of tracheal cancer at any point during the life of the biological children of the participant.                   | 1. Ever had tracheal cancer                                  |
| DIS_CANCER_CHILD_TRACHEA_NUM  | Number of children with tracheal cancer        | Total number of participant's biological children that have ever had tracheal cancer.                                       | NA                                                           |
| DIS_CANCER_CHILD_UTERUS       | Children uterine cancer                        | Occurrence of uterine cancer at any point during the life of the biological children of the participant.                    | 1. Ever had uterine cancer                                   |
| DIS_CANCER_CHILD_UTERUS_NUM   | Number of children with uterine cancer         | Total number of participant's biological children that have ever had uterine cancer.                                        | NA                                                           |
| DIS_CANCER_EVER               | Lifetime occurrence of cancer                  | Occurrence of cancer at any point during the life of the participant.                                                       | 0. Never had cancer   1. Ever had cancer                     |
| DIS_CANCER_FAM_EVER           | Lifetime occurrence of cancer in family        | Occurrence of cancer amongst participant's biological family members (mother, father, siblings and children).               | 0. No family history of cancer   1. Family history of cancer |
| DIS_CANCER_F_BLADDER          | Father bladder cancer                          | Occurrence of bladder cancer at any point during the life of the participant's biological father.                           | 1. Ever had bladder cancer                                   |
| DIS_CANCER_F_BRAIN            | Father brain cancer                            | Occurrence of brain cancer at any point during the life of the participant's biological father.                             | 1. Ever had brain cancer                                     |
| DIS_CANCER_F_BREAST           | Father breast cancer                           | Occurrence of breast cancer at any point during the life of the participant's biological father.                            | 1. Ever had breast cancer                                    |
| DIS_CANCER_F_COLON            | Father colon cancer                            | Occurrence of colon cancer at any point during the life of the participant's biological father.                             | 1. Ever had colon cancer                                     |
| DIS_CANCER_F_ESOPHAGUS        | Father esophageal cancer                       | Occurrence of esophageal cancer at any point during the life of the participant's biological father.                        | 1. Ever had esophageal cancer                                |
| DIS_CANCER_F_EVER             | Lifetime occurrence of cancer in father        | Occurrence of cancer at any point during the life of the participant's biological father.                                   | 0. Father has not had cancer   1. Father has had cancer      |
| DIS_CANCER_F_KIDNEY           | Father kidney cancer                           | Occurrence of kidney cancer at any point during the life of the participant's biological father.                            | 1. Ever had kidney cancer                                    |

Appendix 1 (as supplied by the authors): List of the Health and Risk Factor Questionnaire DataSchema variables (Version 2.0 - Oct. 2017)

| Variable               | label                                   | Description                                                                                                                   | Categories                                              |
|------------------------|-----------------------------------------|-------------------------------------------------------------------------------------------------------------------------------|---------------------------------------------------------|
| DIS_CANCER_F_LARYNX    | Father laryngeal cancer                 | Occurrence of laryngeal cancer at any point during the life of the participant's biological father.                           | 1. Ever had laryngeal cancer                            |
| DIS_CANCER_F_LEUKEMIA  | Father leukemia                         | Occurrence of leukemia at any point during the life of the participant's biological father.                                   | 1. Ever had leukemia                                    |
| DIS_CANCER_F_LIVER     | Father liver cancer                     | Occurrence of liver cancer at any point during the life of the participant's biological father.                               | 1. Ever had liver cancer                                |
| DIS_CANCER_F_LUNG      | Father lung cancer                      | Occurrence of lung and bronchus cancer at any point during the life of the participant's biological father.                   | 1. Ever had lung and bronchus cancer                    |
| DIS_CANCER_F_LYMPHOMA  | Father lymphoma                         | Occurrence of lymphoma at any point during the life of the participant's biological father.                                   | 1. Ever had lymphoma                                    |
| DIS_CANCER_F_NHL       | Father non-Hodgkin's lymphoma           | Occurrence of non-Hodgkin's lymphoma at any point during the life of the participant's biological father.                     | 1. Ever had non-Hodgkin's lymphoma                      |
| DIS_CANCER_F_OTHER     | Father other cancer                     | Occurrence of other cancer than those listed at any point during the life of the participant's biological father.             | 1. Ever had other cancer                                |
| DIS_CANCER_F_OTSP      | Father cancer, other specify            | Name of other type of cancer than those listed occurring at any point during the life of the participant's biological father. | NA                                                      |
| DIS_CANCER_F_PANCREAS  | Father pancreatic cancer                | Occurrence of pancreatic cancer at any point during the life of the participant's biological father.                          | 1. Ever had pancreatic cancer                           |
| DIS_CANCER_F_PROSTATE  | Father prostate cancer                  | Occurrence of prostate cancer at any point during the life of the participant's biological father.                            | 1. Ever had prostate cancer                             |
| DIS_CANCER_F_RECTUM    | Father rectal cancer                    | Occurrence of rectal cancer at any point during the life of the participant's biological father.                              | 1. Ever had rectal cancer                               |
| DIS_CANCER_F_SKIN      | Father skin cancer                      | Occurrence of skin cancer at any point during the life of the participant's biological father.                                | 1. Ever had skin cancer                                 |
| DIS_CANCER_F_STOMACH   | Father stomach cancer                   | Occurrence of stomach cancer at any point during the life of the participant's biological father.                             | 1. Ever had stomach cancer                              |
| DIS_CANCER_F_THYROID   | Father thyroid cancer                   | Occurrence of thyroid cancer at any point during the life of the participant's biological father.                             | 1. Ever had thyroid cancer                              |
| DIS_CANCER_F_TRACHEA   | Father tracheal cancer                  | Occurrence of tracheal cancer at any point during the life of the participant's biological father.                            | 1. Ever had tracheal cancer                             |
| DIS_CANCER_M_BLADDER   | Mother bladder cancer                   | Occurrence of bladder cancer at any point during the life of the participant's biological mother.                             | 1. Ever had bladder cancer                              |
| DIS_CANCER_M_BRAIN     | Mother brain cancer                     | Occurrence of brain cancer at any point during the life of the participant's biological mother.                               | 1. Ever had brain cancer                                |
| DIS_CANCER_M_BREAST    | Mother breast cancer                    | Occurrence of breast cancer at any point during the life of the participant's biological mother.                              | 1. Ever had breast cancer                               |
| DIS_CANCER_M_CERVIX    | Mother cervical cancer                  | Occurrence of cervical cancer at any point during the life of the participant's biological mother.                            | 1. Ever had cervical cancer                             |
| DIS_CANCER_M_COLON     | Mother colon cancer                     | Occurrence of colon cancer at any point during the life of the participant's biological mother.                               | 1. Ever had colon cancer                                |
| DIS_CANCER_M_ESOPHAGUS | Mother esophageal cancer                | Occurrence of esophageal cancer at any point during the life of the participant's biological mother.                          | 1. Ever had esophageal cancer                           |
| DIS_CANCER_M_EVER      | Lifetime occurrence of cancer in mother | Occurrence of cancer at any point during the life of the participant's biological mother.                                     | 0. Mother has not had cancer   1. Mother has had cancer |
| DIS_CANCER_M_KIDNEY    | Mother kidney cancer                    | Occurrence of kidney cancer at any point during the life of the participant's biological mother.                              | 1. Ever had kidney cancer                               |
| DIS_CANCER_M_LARYNX    | Mother laryngeal cancer                 | Occurrence of laryngeal cancer at any point during the life of the participant's biological mother.                           | 1. Ever had laryngeal cancer                            |
| DIS_CANCER_M_LEUKEMIA  | Mother leukemia                         | Occurrence of leukemia at any point during the life of the participant's biological mother.                                   | 1. Ever had leukemia                                    |
| DIS_CANCER_M_LIVER     | Mother liver cancer                     | Occurrence of liver cancer at any point during the life of the participant's biological mother.                               | 1. Ever had liver cancer                                |
| DIS_CANCER_M_LUNG      | Mother lung cancer                      | Occurrence of lung and bronchus cancer at any point during the life of the participant's biological mother.                   | 1. Ever had lung and bronchus cancer                    |
| DIS_CANCER_M_LYMPHOMA  | Mother lymphoma                         | Occurrence of lymphoma at any point during the life of the participant's biological mother.                                   | 1. Ever had lymphoma                                    |
| DIS_CANCER_M_NHL       | Mother non-Hodgkin's lymphoma           | Occurrence of non-Hodgkin's lymphoma at any point during the life of the participant's biological mother.                     | 1. Ever had non-Hodgkin's lymphoma                      |

**Appendix 1 (as supplied by the authors): List of the Health and Risk Factor Questionnaire DataSchema variables (Version 2.0 - Oct. 2017)**

| Variable                     | label                                     | Description                                                                                                                             | Categories                                                        |
|------------------------------|-------------------------------------------|-----------------------------------------------------------------------------------------------------------------------------------------|-------------------------------------------------------------------|
| DIS_CANCER_M_OTHER           | Mother other cancer                       | Occurrence of other cancer than those listed at any point during the life of the participant's biological mother.                       | 1. Ever had other cancer                                          |
| DIS_CANCER_M_OTSP            | Mother cancer, other specify              | Name of other type of cancer than those listed occurring at any point during the life of the participant's biological mother.           | NA                                                                |
| DIS_CANCER_M_OVARY           | Mother ovarian cancer                     | Occurrence of ovarian cancer at any point during the life of the participant's biological mother.                                       | 1. Ever had ovarian cancer                                        |
| DIS_CANCER_M_PANCREAS        | Mother pancreatic cancer                  | Occurrence of pancreatic cancer at any point during the life of the participant's biological mother.                                    | 1. Ever had pancreatic cancer                                     |
| DIS_CANCER_M_RECTUM          | Mother rectal cancer                      | Occurrence of rectal cancer at any point during the life of the participant's biological mother.                                        | 1. Ever had rectal cancer                                         |
| DIS_CANCER_M_SKIN            | Mother skin cancer                        | Occurrence of skin cancer at any point during the life of the participant's biological mother.                                          | 1. Ever had skin cancer                                           |
| DIS_CANCER_M_STOMACH         | Mother stomach cancer                     | Occurrence of stomach cancer at any point during the life of the participant's biological mother.                                       | 1. Ever had stomach cancer                                        |
| DIS_CANCER_M_THYROID         | Mother thyroid cancer                     | Occurrence of thyroid cancer at any point during the life of the participant's biological mother.                                       | 1. Ever had thyroid cancer                                        |
| DIS_CANCER_M_TRACHEA         | Mother tracheal cancer                    | Occurrence of tracheal cancer at any point during the life of the participant's biological mother.                                      | 1. Ever had tracheal cancer                                       |
| DIS_CANCER_M_UTERUS          | Mother uterine cancer                     | Occurrence of uterine cancer at any point during the life of the participant's biological mother.                                       | 1. Ever had uterine cancer                                        |
| DIS_CANCER_SIB_BLADDER       | Siblings bladder cancer                   | Occurrence of bladder cancer at any point during the life of the biological siblings (one or two common parents) of the participant.    | 1. Ever had bladder cancer                                        |
| DIS_CANCER_SIB_BLADDER_NUM   | Number of siblings with bladder cancer    | Total number of participant's biological siblings (one or two common parents) that have ever had bladder cancer.                        | NA                                                                |
| DIS_CANCER_SIB_BRAIN         | Siblings brain cancer                     | Occurrence of brain cancer at any point during the life of the biological siblings (one or two common parents) of the participant.      | 1. Ever had brain cancer                                          |
| DIS_CANCER_SIB_BRAIN_NUM     | Number of siblings with brain cancer      | Total number of participant's biological siblings (one or two common parents) that have ever had brain cancer.                          | NA                                                                |
| DIS_CANCER_SIB_BREAST        | Siblings breast cancer                    | Occurrence of breast cancer at any point during the life of the biological siblings (one or two common parents) of the participant.     | 1. Ever had breast cancer                                         |
| DIS_CANCER_SIB_BREAST_NUM    | Number of siblings with breast cancer     | Total number of participant's biological siblings (one or two common parents) that have ever had breast cancer.                         | NA                                                                |
| DIS_CANCER_SIB_CERVIX        | Siblings cervical cancer                  | Occurrence of cervical cancer at any point during the life of the biological siblings (one or two common parents) of the participant.   | 1. Ever had cervical cancer                                       |
| DIS_CANCER_SIB_CERVIX_NUM    | Number of siblings with cervical cancer   | Total number of participant's biological siblings (one or two common parents) that have ever had cervical cancer.                       | NA                                                                |
| DIS_CANCER_SIB_COLON         | Siblings colon cancer                     | Occurrence of colon cancer at any point during the life of the biological siblings (one or two common parents) of the participant.      | 1. Ever had colon cancer                                          |
| DIS_CANCER_SIB_COLON_NUM     | Number of siblings with colon cancer      | Total number of participant's biological siblings (one or two common parents) that have ever had colon cancer.                          | NA                                                                |
| DIS_CANCER_SIB_ESOPHAGUS     | Siblings esophageal cancer                | Occurrence of esophageal cancer at any point during the life of the biological siblings (one or two common parents) of the participant. | 1. Ever had esophageal cancer                                     |
| DIS_CANCER_SIB_ESOPHAGUS_NUM | Number of siblings with esophageal cancer | Total number of participant's biological siblings (one or two common parents) that have ever had esophageal cancer.                     | NA                                                                |
| DIS_CANCER_SIB_EVER          | Lifetime occurrence of cancer in siblings | Occurrence of cancer at any point during the life of the participant's biological siblings.                                             | 0. No sibling had cancer   1. At least one sibling has had cancer |
| DIS_CANCER_SIB_KIDNEY        | Siblings kidney cancer                    | Occurrence of kidney cancer at any point during the life of the biological siblings (one or two common parents) of the participant.     | 1. Ever had kidney cancer                                         |
| DIS_CANCER_SIB_KIDNEY_NUM    | Number of siblings with kidney cancer     | Total number of participant's biological siblings (one or two common parents) that have ever had kidney cancer.                         | NA                                                                |
| DIS_CANCER_SIB_LARYNX        | Siblings laryngeal cancer                 | Occurrence of laryngeal cancer at any point during the life of the biological siblings (one or two common parents) of the participant.  | 1. Ever had laryngeal cancer                                      |

**Appendix 1 (as supplied by the authors): List of the Health and Risk Factor Questionnaire DataSchema variables (Version 2.0 - Oct. 2017)**

| Variable                    | label                                          | Description                                                                                                                                             | Categories                           |
|-----------------------------|------------------------------------------------|---------------------------------------------------------------------------------------------------------------------------------------------------------|--------------------------------------|
| DIS_CANCER_SIB_LARYNX_NUM   | Number of siblings with laryngeal cancer       | Total number of participant's biological siblings (one or two common parents) that have ever had laryngeal cancer.                                      | NA                                   |
| DIS_CANCER_SIB_LEUKEMIA     | Siblings leukemia                              | Occurrence of leukemia at any point during the life of the biological siblings (one or two common parents) of the participant.                          | 1. Ever had leukemia                 |
| DIS_CANCER_SIB_LEUKEMIA_NUM | Number of siblings with leukemia               | Total number of participant's biological siblings (one or two common parents) that have ever had leukemia.                                              | NA                                   |
| DIS_CANCER_SIB_LIVER        | Siblings liver cancer                          | Occurrence of liver cancer at any point during the life of the biological siblings (one or two common parents) of the participant.                      | 1. Ever had liver cancer             |
| DIS_CANCER_SIB_LIVER_NUM    | Number of siblings with liver cancer           | Total number of participant's biological siblings (one or two common parents) that have ever had liver cancer.                                          | NA                                   |
| DIS_CANCER_SIB_LUNG         | Siblings lung cancer                           | Occurrence of lung and bronchus cancer at any point during the life of the biological siblings (one or two common parents) of the participant.          | 1. Ever had lung and bronchus cancer |
| DIS_CANCER_SIB_LUNG_NUM     | Number of siblings with lung cancer            | Total number of participant's biological siblings (one or two common parents) that have ever had lung and bronchus cancer.                              | NA                                   |
| DIS_CANCER_SIB_LYMPHOMA     | Siblings lymphoma                              | Occurrence of lymphoma at any point during the life of the biological siblings (one or two common parents) of the participant.                          | 1. Ever had lymphoma                 |
| DIS_CANCER_SIB_LYMPHOMA_NUM | Number of siblings with lymphoma               | Total number of participant's biological siblings (one or two common parents) that have ever had lymphoma.                                              | NA                                   |
| DIS_CANCER_SIB_NHL          | Siblings non-Hodgkin's lymphoma                | Occurrence of non-Hodgkin's lymphoma at any point during the life of the biological siblings (one or two common parents) of the participant.            | 1. Ever had non-Hodgkin's lymphoma   |
| DIS_CANCER_SIB_NHL_NUM      | Number of siblings with non-Hodgkin's lymphoma | Total number of participant's biological siblings (one or two common parents) that have ever had non-Hodgkin's lymphoma.                                | NA                                   |
| DIS_CANCER_SIB_OTHER        | Siblings other cancer                          | Occurrence of other cancer than those listed at any point during the life of the biological siblings (one or two common parents) of the participant.    | 1. Ever had other cancer             |
| DIS_CANCER_SIB_OTHER_NUM    | Number of siblings with other cancer           | Total number of participant's biological siblings (one or two common parents) that have ever had other cancer than those listed.                        | NA                                   |
| DIS_CANCER_SIB_OTSP         | Siblings cancer, other specify                 | Name of other type of cancer than those listed occurring at any point during the life of participant's biological siblings (one or two common parents). | NA                                   |
| DIS_CANCER_SIB_OVARY        | Siblings ovarian cancer                        | Occurrence of ovarian cancer at any point during the life of the biological siblings (one or two common parents) of the participant.                    | 1. Ever had ovarian cancer           |
| DIS_CANCER_SIB_OVARY_NUM    | Number of siblings with ovarian cancer         | Total number of participant's biological siblings (one or two common parents) that have ever had ovarian cancer.                                        | NA                                   |
| DIS_CANCER_SIB_PANCREAS     | Siblings pancreatic cancer                     | Occurrence of pancreatic cancer at any point during the life of the biological siblings (one or two common parents) of the participant.                 | 1. Ever had pancreatic cancer        |
| DIS_CANCER_SIB_PANCREAS_NUM | Number of siblings with pancreatic cancer      | Total number of participant's biological siblings (one or two common parents) that have ever had pancreatic cancer.                                     | NA                                   |
| DIS_CANCER_SIB_PROSTATE     | Siblings prostate cancer                       | Occurrence of prostate cancer at any point during the life of the biological siblings (one or two common parents) of the participant.                   | 1. Ever had prostate cancer          |
| DIS_CANCER_SIB_PROSTATE_NUM | Number of siblings with prostate cancer        | Total number of participant's biological siblings (one or two common parents) that have ever had prostate cancer.                                       | NA                                   |
| DIS_CANCER_SIB_RECTUM       | Siblings rectal cancer                         | Occurrence of rectal cancer at any point during the life of the biological siblings (one or two common parents) of the participant.                     | 1. Ever had rectal cancer            |
| DIS_CANCER_SIB_RECTUM_NUM   | Number of siblings with rectal cancer          | Total number of participant's biological siblings (one or two common parents) that have ever had rectal cancer.                                         | NA                                   |
| DIS_CANCER_SIB_SKIN         | Siblings skin cancer                           | Occurrence of skin cancer at any point during the life of the biological siblings (one or two common parents) of the participant.                       | 1. Ever had skin cancer              |
| DIS_CANCER_SIB_SKIN_NUM     | Number of siblings with skin cancer            | Total number of participant's biological siblings (one or two common parents) that have ever had skin cancer.                                           | NA                                   |

**Appendix 1 (as supplied by the authors): List of the Health and Risk Factor Questionnaire DataSchema variables (Version 2.0 - Oct. 2017)**

| Variable                         | label                                                       | Description                                                                                                                           | Categories                                                                                                                                                                 |
|----------------------------------|-------------------------------------------------------------|---------------------------------------------------------------------------------------------------------------------------------------|----------------------------------------------------------------------------------------------------------------------------------------------------------------------------|
| DIS_CANCER_SIB_STOMACH           | Siblings stomach cancer                                     | Occurrence of stomach cancer at any point during the life of the biological siblings (one or two common parents) of the participant.  | 1. Ever had stomach cancer                                                                                                                                                 |
| DIS_CANCER_SIB_STOMACH_NUM       | Number of siblings with stomach cancer                      | Total number of participant's biological siblings (one or two common parents) that have ever had stomach cancer.                      | NA                                                                                                                                                                         |
| DIS_CANCER_SIB_THYROID           | Siblings thyroid cancer                                     | Occurrence of thyroid cancer at any point during the life of the biological siblings (one or two common parents) of the participant.  | 1. Ever had thyroid cancer                                                                                                                                                 |
| DIS_CANCER_SIB_THYROID_NUM       | Number of siblings with thyroid cancer                      | Total number of participant's biological siblings (one or two common parents) that have ever had thyroid cancer.                      | NA                                                                                                                                                                         |
| DIS_CANCER_SIB_TRACHEA           | Siblings tracheal cancer                                    | Occurrence of tracheal cancer at any point during the life of the biological siblings (one or two common parents) of the participant. | 1. Ever had tracheal cancer                                                                                                                                                |
| DIS_CANCER_SIB_TRACHEA_NUM       | Number of siblings with tracheal cancer                     | Total number of participant's biological siblings (one or two common parents) that have ever had tracheal cancer.                     | NA                                                                                                                                                                         |
| DIS_CANCER_SIB_UTERUS            | Siblings uterine cancer                                     | Occurrence of uterine cancer at any point during the life of the biological siblings (one or two common parents) of the participant.  | 1. Ever had uterine cancer                                                                                                                                                 |
| DIS_CANCER_SIB_UTERUS_NUM        | Number of siblings with uterine cancer                      | Total number of participant's biological siblings (one or two common parents) that have ever had uterine cancer.                      | NA                                                                                                                                                                         |
| <b>Diseases-Digestive system</b> |                                                             |                                                                                                                                       |                                                                                                                                                                            |
| DIS_CH_AGE                       | Age at first diagnosis of chronic hepatitis                 | Age of the participant at first diagnosis of chronic hepatitis.                                                                       | -7. Not Applicable                                                                                                                                                         |
| DIS_CH_CHILD_EVER                | Lifetime occurrence of chronic hepatitis in children        | Occurrence of chronic hepatitis at any point during the life of the participant's biological children.                                | 0. Never had chronic hepatitis   1. Ever had chronic hepatitis   2. Presumed - Never had chronic hepatitis                                                                 |
| DIS_CH_CHILD_NUM                 | Number of children with chronic hepatitis                   | Total number of participant's biological children with chronic hepatitis.                                                             | NA                                                                                                                                                                         |
| DIS_CH_EVER                      | Lifetime occurrence of chronic hepatitis                    | Occurrence of chronic hepatitis at any point during the life of the participant.                                                      | 0. Never had chronic hepatitis   1. Ever had chronic hepatitis   2. Presumed - Never had chronic hepatitis                                                                 |
| DIS_CH_FAM_EVER                  | Family history of chronic hepatitis                         | Occurrence of chronic hepatitis at any point during the life of the participant's relatives (father, mother, siblings and children).  | 0. No family history of chronic hepatitis   1. Family history of chronic hepatitis   2. Presumed - No family history of chronic hepatitis                                  |
| DIS_CH_F_EVER                    | Lifetime occurrence of father chronic hepatitis             | Occurrence of chronic hepatitis at any point during the life of the participant's biological father.                                  | 0. Never had chronic hepatitis   1. Ever had chronic hepatitis   2. Presumed - Never had chronic hepatitis                                                                 |
| DIS_CH_M_EVER                    | Lifetime occurrence of mother chronic hepatitis             | Occurrence of chronic hepatitis at any point during the life of the participant's biological mother.                                  | 0. Never had chronic hepatitis   1. Ever had chronic hepatitis   2. Presumed - Never had chronic hepatitis                                                                 |
| DIS_CH_SIB_EVER                  | Lifetime occurrence of chronic hepatitis in siblings        | Occurrence of chronic hepatitis at any point during the life of the participant's biological siblings (one or two common parents).    | 0. Never had chronic hepatitis   1. Ever had chronic hepatitis   2. Presumed - Never had chronic hepatitis                                                                 |
| DIS_CH_SIB_NUM                   | Number of siblings with chronic hepatitis                   | Total number of participant's biological siblings (one or two common parents) with chronic hepatitis.                                 | NA                                                                                                                                                                         |
| HS_POLYP_EVER                    | Ever had polyp removed from colon                           | Indicator of whether the participant has ever had a polyp removed from colon.                                                         | 1. Ever had a polyp removed from colon   2. Never had a polyp removed from colon and ever had a colonoscopy or sigmoidoscopy   3. Never had a colonoscopy or sigmoidoscopy |
| DIS_CROHN_AGE                    | Age at first diagnosis of Crohn's disease                   | Age of the participant at first diagnosis of Crohn's disease.                                                                         | -7. Not Applicable                                                                                                                                                         |
| DIS_CROHN_CHILD_EVER             | Lifetime occurrence of Crohn's disease in children          | Occurrence of Crohn's disease at any point during the life of the participant's biological children.                                  | 0. Never had Crohn's disease   1. Ever had Crohn's disease   2. Presumed - Never had Crohn's disease                                                                       |
| DIS_CROHN_CHILD_NUM              | Number of children with Crohn's disease                     | Total number of participant's biological children with Crohn's disease.                                                               | NA                                                                                                                                                                         |
| DIS_CROHN_EVER                   | Lifetime occurrence of Crohn's disease                      | Occurrence of Crohn's disease at any point during the life of the participant.                                                        | 0. Never had Crohn's disease   1. Ever had Crohn's disease   2. Presumed - Never had Crohn's disease                                                                       |
| DIS_CROHN_FAM_EVER               | Family history of Crohn's disease                           | Occurrence of Crohn's disease at any point during the life of the participant's relatives (father, mother, siblings and children).    | 0. No family history of Crohn's disease   1. Family history of Crohn's disease   2. Presumed - No family history of Crohn's disease                                        |
| DIS_CROHN_F_EVER                 | Lifetime occurrence of Crohn's disease in father            | Occurrence of Crohn's disease at any point during the life of the participant's biological father.                                    | 0. Never had Crohn's disease   1. Ever had Crohn's disease   2. Presumed - Never had Crohn's disease                                                                       |
| DIS_CROHN_M_EVER                 | Lifetime occurrence of Crohn's disease in mother            | Occurrence of Crohn's disease at any point during the life of the participant's biological mother.                                    | 0. Never had Crohn's disease   1. Ever had Crohn's disease   2. Presumed - Never had Crohn's disease                                                                       |
| DIS_CROHN_SIB_EVER               | Lifetime occurrence of Crohn's disease in siblings          | Occurrence of Crohn's disease at any point during the life of the participant's biological siblings (one or two common parents).      | 0. Never had Crohn's disease   1. Ever had Crohn's disease   2. Presumed - Never had Crohn's disease                                                                       |
| DIS_CROHN_SIB_NUM                | Number of siblings with Crohn's disease                     | Total number of participant's biological siblings (one or two common parents) with Crohn's disease.                                   | NA                                                                                                                                                                         |
| DIS_IBS_AGE                      | Age at first diagnosis of irritable bowel syndrome          | Age of the participant at first diagnosis of irritable bowel syndrome.                                                                | -7. Not Applicable                                                                                                                                                         |
| DIS_IBS_CHILD_EVER               | Lifetime occurrence of irritable bowel syndrome in children | Occurrence of irritable bowel syndrome at any point during the life of the participant's biological children.                         | 0. Never had irritable bowel syndrome   1. Ever had irritable bowel syndrome   2. Presumed - Never had irritable bowel syndrome                                            |



**Appendix 1 (as supplied by the authors): List of the Health and Risk Factor Questionnaire DataSchema variables (Version 2.0 - Oct. 2017)**

| Variable                           | label                                                                     | Description                                                                                                                                 | Categories                                                                                                                                                     |
|------------------------------------|---------------------------------------------------------------------------|---------------------------------------------------------------------------------------------------------------------------------------------|----------------------------------------------------------------------------------------------------------------------------------------------------------------|
| DIS_IBS_CHILD_NUM                  | Number of children with irritable bowel syndrome                          | Total number of participant's biological children with irritable bowel syndrome.                                                            | NA                                                                                                                                                             |
| DIS_IBS_EVER                       | Lifetime occurrence of irritable bowel syndrome                           | Occurrence of irritable bowel syndrome at any point during the life of the participant.                                                     | 0. Never had irritable bowel syndrome   1. Ever had irritable bowel syndrome   2. Presumed - Never had irritable bowel syndrome                                |
| DIS_IBS_FAM_EVER                   | Family history of irritable bowel syndrome                                | Occurrence of irritable bowel syndrome at any point during the life of the participant's relatives (father, mother, siblings and children). | 0. No family history of irritable bowel syndrome   1. Family history of irritable bowel syndrome   2. Presumed - No family history of irritable bowel syndrome |
| DIS_IBS_F_EVER                     | Lifetime occurrence of irritable bowel syndrome in father                 | Occurrence of irritable bowel syndrome at any point during the life of the participant's biological father.                                 | 0. Never had irritable bowel syndrome   1. Ever had irritable bowel syndrome   2. Presumed - Never had irritable bowel syndrome                                |
| DIS_IBS_M_EVER                     | Lifetime occurrence of irritable bowel syndrome in mother                 | Occurrence of irritable bowel syndrome at any point during the life of the participant's biological mother.                                 | 0. Never had irritable bowel syndrome   1. Ever had irritable bowel syndrome   2. Presumed - Never had irritable bowel syndrome                                |
| DIS_IBS_SIB_EVER                   | Lifetime occurrence of irritable bowel syndrome in siblings               | Occurrence of irritable bowel syndrome at any point during the life of the participant's biological siblings (one or two common parents).   | 0. Never had irritable bowel syndrome   1. Ever had irritable bowel syndrome   2. Presumed - Never had irritable bowel syndrome                                |
| DIS_IBS_SIB_NUM                    | Number of siblings with irritable bowel syndrome                          | Total number of participant's biological siblings (one or two common parents) with irritable bowel syndrome.                                | NA                                                                                                                                                             |
| DIS_LC_AGE                         | Age at first diagnosis of liver cirrhosis                                 | Age of the participant at first diagnosis of liver cirrhosis.                                                                               | -7. Not Applicable                                                                                                                                             |
| DIS_LC_CHILD_EVER                  | Lifetime occurrence of liver cirrhosis in children                        | Occurrence of liver cirrhosis at any point during the life of the participant's biological children.                                        | 0. Never had liver cirrhosis   1. Ever had liver cirrhosis   2. Presumed - Never had liver cirrhosis                                                           |
| DIS_LC_CHILD_NUM                   | Number of children with liver cirrhosis                                   | Total number of participant's biological children with liver cirrhosis.                                                                     | NA                                                                                                                                                             |
| DIS_LC_EVER                        | Lifetime occurrence of liver cirrhosis                                    | Occurrence of liver cirrhosis at any point during the life of the participant.                                                              | 0. Never had liver cirrhosis   1. Ever had liver cirrhosis   2. Presumed - Never had liver cirrhosis                                                           |
| DIS_LC_FAM_EVER                    | Family history of liver cirrhosis                                         | Occurrence of liver cirrhosis at any point during the life of the participant's relatives (father, mother, siblings and children).          | 0. No family history of liver cirrhosis   1. Family history of liver cirrhosis   2. Presumed - No family history of liver cirrhosis                            |
| DIS_LC_F_EVER                      | Lifetime occurrence of liver cirrhosis in father                          | Occurrence of liver cirrhosis at any point during the life of the participant's biological father.                                          | 0. Never had liver cirrhosis   1. Ever had liver cirrhosis   2. Presumed - Never had liver cirrhosis                                                           |
| DIS_LC_M_EVER                      | Lifetime occurrence of liver cirrhosis in mother                          | Occurrence of liver cirrhosis at any point during the life of the participant's biological mother.                                          | 0. Never had liver cirrhosis   1. Ever had liver cirrhosis   2. Presumed - Never had liver cirrhosis                                                           |
| DIS_LC_SIB_EVER                    | Lifetime occurrence of liver cirrhosis in siblings                        | Occurrence of liver cirrhosis at any point during the life of the participant's biological siblings (one or two common parents).            | 0. Never had liver cirrhosis   1. Ever had liver cirrhosis   2. Presumed - Never had liver cirrhosis                                                           |
| DIS_LC_SIB_NUM                     | Number of siblings with liver cirrhosis                                   | Total number of participant's biological siblings (one or two common parents) with liver cirrhosis.                                         | NA                                                                                                                                                             |
| DIS_UC_AGE                         | Age at first diagnosis of ulcerative colitis                              | Age of the participant at first diagnosis of ulcerative colitis.                                                                            | -7. Not Applicable                                                                                                                                             |
| DIS_UC_CHILD_EVER                  | Lifetime occurrence of ulcerative colitis in children                     | Occurrence of ulcerative colitis at any point during the life of the participant's biological children.                                     | 0. Never had ulcerative colitis   1. Ever had ulcerative colitis   2. Presumed - Never had ulcerative colitis                                                  |
| DIS_UC_CHILD_NUM                   | Number of children with ulcerative colitis                                | Total number of participant's biological children with ulcerative colitis.                                                                  | NA                                                                                                                                                             |
| DIS_UC_EVER                        | Lifetime occurrence of ulcerative colitis                                 | Occurrence of ulcerative colitis at any point during the life of the participant.                                                           | 0. Never had ulcerative colitis   1. Ever had ulcerative colitis   2. Presumed - Never had ulcerative colitis                                                  |
| DIS_UC_FAM_EVER                    | Family history of ulcerative colitis                                      | Occurrence of ulcerative colitis at any point during the life of the participant's relatives (father, mother, siblings and children).       | 0. No family history of ulcerative colitis   1. Family history of ulcerative colitis   2. Presumed - No family history of ulcerative colitis                   |
| DIS_UC_F_EVER                      | Lifetime occurrence of ulcerative colitis in father                       | Occurrence of ulcerative colitis at any point during the life of the participant's biological father.                                       | 0. Never had ulcerative colitis   1. Ever had ulcerative colitis   2. Presumed - Never had ulcerative colitis                                                  |
| DIS_UC_M_EVER                      | Lifetime occurrence of ulcerative colitis in mother                       | Occurrence of ulcerative colitis at any point during the life of the participant's biological mother.                                       | 0. Never had ulcerative colitis   1. Ever had ulcerative colitis   2. Presumed - Never had ulcerative colitis                                                  |
| DIS_UC_SIB_EVER                    | Lifetime occurrence of ulcerative colitis in siblings                     | Occurrence of ulcerative colitis at any point during the life of the participant's biological siblings (one or two common parents).         | 0. Never had ulcerative colitis   1. Ever had ulcerative colitis   2. Presumed - Never had ulcerative colitis                                                  |
| DIS_UC_SIB_NUM                     | Number of siblings with ulcerative colitis                                | Total number of participant's biological siblings (one or two common parents) with ulcerative colitis.                                      | NA                                                                                                                                                             |
| <b>Diseases-Circulatory system</b> |                                                                           |                                                                                                                                             |                                                                                                                                                                |
| DIS_HBP_AGE                        | Age at first diagnosis of high blood pressure, excluding during pregnancy | Age of the participant at first diagnosis of high blood pressure or hypertension, excluding during pregnancy.                               | -7. Not Applicable                                                                                                                                             |
| DIS_HBP_CHILD_EVER                 | Lifetime occurrence of high blood pressure in children                    | Occurrence of high blood pressure at any point during the life of the participant's biological children.                                    | 0. Never had high blood pressure   1. Ever had high blood pressure   2. Presumed - Never had high blood pressure                                               |
| DIS_HBP_CHILD_NUM                  | Number of children with high blood pressure                               | Total number of participant's biological children with high blood pressure.                                                                 | NA                                                                                                                                                             |
| DIS_HBP_EVER                       | Lifetime occurrence of high blood pressure, excluding during pregnancy    | Occurrence of high blood pressure or hypertension at any point during the life of the participant, excluding during pregnancy.              | 0. Never had high blood pressure   1. Ever had high blood pressure   2. Presumed - Never had high blood pressure                                               |

**Appendix 1 (as supplied by the authors): List of the Health and Risk Factor Questionnaire DataSchema variables (Version 2.0 - Oct. 2017)**

| Variable                       | label                                                    | Description                                                                                                                              | Categories                                                                                                                                                                                                       |
|--------------------------------|----------------------------------------------------------|------------------------------------------------------------------------------------------------------------------------------------------|------------------------------------------------------------------------------------------------------------------------------------------------------------------------------------------------------------------|
| DIS_HBP_FAM_EVER               | Family history of high blood pressure                    | Occurrence of high blood pressure at any point during the life of the participant's relatives (father, mother, siblings and children).   | 0. No family history of high blood pressure   1. Family history of high blood pressure   2. Presumed - No family history of high blood pressure                                                                  |
| DIS_HBP_F_EVER                 | Lifetime occurrence of high blood pressure in father     | Occurrence of high blood pressure at any point during the life of the participant's biological father.                                   | 0. Never had high blood pressure   1. Ever had high blood pressure   2. Presumed - Never had high blood pressure                                                                                                 |
| DIS_HBP_M_EVER                 | Lifetime occurrence of high blood pressure in mother     | Occurrence of high blood pressure at any point during the life of the participant's biological mother.                                   | 0. Never had high blood pressure   1. Ever had high blood pressure   2. Presumed - Never had high blood pressure                                                                                                 |
| DIS_HBP_SIB_EVER               | Lifetime occurrence of high blood pressure in siblings   | Occurrence of high blood pressure at any point during the life of the participant's biological siblings (one or two common parents).     | 0. Never had high blood pressure   1. Ever had high blood pressure   2. Presumed - Never had high blood pressure                                                                                                 |
| DIS_HBP_SIB_NUM                | Number of siblings with high blood pressure              | Total number of participant's biological siblings (one or two common parents) with high blood pressure.                                  | NA                                                                                                                                                                                                               |
| DIS_HBP_TX                     | Currently under treatment for high blood pressure        | Indicator of whether the participant is currently under treatment for high blood pressure or hypertension, excluding during pregnancy.   | 0. Not currently under treatment for high blood pressure   1. Currently under treatment for high blood pressure   2. Presumed - Not currently under treatment for high blood pressure   -7. Not Applicable       |
| DIS_MI_AGE                     | Age at first diagnosis of myocardial infarction          | Age of the participant at first diagnosis of myocardial infarction.                                                                      | -7. Not Applicable                                                                                                                                                                                               |
| DIS_MI_CHILD_EVER              | Lifetime occurrence of myocardial infarction in children | Occurrence of myocardial infarction at any point during the life of the participant's biological children.                               | 0. Never had myocardial infarction   1. Ever had myocardial infarction   2. Presumed - Never had myocardial infarction                                                                                           |
| DIS_MI_CHILD_NUM               | Number of children with myocardial infarction            | Total number of participant's biological children with myocardial infarction.                                                            | NA                                                                                                                                                                                                               |
| DIS_MI_EVER                    | Lifetime occurrence of myocardial infarction             | Occurrence of myocardial infarction at any point during the life of the participant.                                                     | 0. Never had myocardial infarction   1. Ever had myocardial infarction   2. Presumed - Never had myocardial infarction                                                                                           |
| DIS_MI_FAM_EVER                | Family history of myocardial infarction                  | Occurrence of myocardial infarction at any point during the life of the participant's relatives (father, mother, siblings and children). | 0. No family history of myocardial infarction   1. Family history of myocardial infarction   2. Presumed - No family history of myocardial infarction                                                            |
| DIS_MI_F_EVER                  | Lifetime occurrence of myocardial infarction in father   | Occurrence of myocardial infarction at any point during the life of the participant's biological father.                                 | 0. Never had myocardial infarction   1. Ever had myocardial infarction   2. Presumed - Never had myocardial infarction                                                                                           |
| DIS_MI_M_EVER                  | Lifetime occurrence of myocardial infarction in mother   | Occurrence of myocardial infarction at any point during the life of the participant's biological mother.                                 | 0. Never had myocardial infarction   1. Ever had myocardial infarction   2. Presumed - Never had myocardial infarction                                                                                           |
| DIS_MI_SIB_EVER                | Lifetime occurrence of myocardial infarction in siblings | Occurrence of myocardial infarction at any point during the life of the participant's biological siblings (one or two common parents).   | 0. Never had myocardial infarction   1. Ever had myocardial infarction   2. Presumed - Never had myocardial infarction                                                                                           |
| DIS_MI_SIB_NUM                 | Number of siblings with myocardial infarction            | Total number of participant's biological siblings (one or two common parents) with myocardial infarction.                                | NA                                                                                                                                                                                                               |
| DIS_MI_TX                      | Currently under treatment for myocardial infarction      | Indicator of whether the participant is currently under treatment for myocardial infarction.                                             | 0. Not currently under treatment for myocardial infarction   1. Currently under treatment for myocardial infarction   2. Presumed - Not currently under treatment for myocardial infarction   -7. Not Applicable |
| DIS_STROKE_AGE                 | Age at first diagnosis of stroke                         | Age of the participant at first diagnosis of stroke.                                                                                     | -7. Not Applicable                                                                                                                                                                                               |
| DIS_STROKE_CHILD_EVER          | Lifetime occurrence of stroke in children                | Occurrence of stroke at any point during the life of the participant's biological children.                                              | 0. Never had stroke   1. Ever had stroke   2. Presumed - Never had stroke                                                                                                                                        |
| DIS_STROKE_CHILD_NUM           | Number of children with stroke                           | Total number of participant's biological children with stroke.                                                                           | NA                                                                                                                                                                                                               |
| DIS_STROKE_EVER                | Lifetime occurrence of stroke                            | Occurrence of stroke at any point during the life of the participant.                                                                    | 0. Never had stroke   1. Ever had stroke   2. Presumed - Never had stroke                                                                                                                                        |
| DIS_STROKE_FAM_EVER            | Family history of stroke                                 | Occurrence of stroke at any point during the life of the participant's relatives (father, mother, siblings and children).                | 0. No family history of stroke   1. Family history of stroke   2. Presumed - No family history of stroke                                                                                                         |
| DIS_STROKE_F_EVER              | Lifetime occurrence of stroke in father                  | Occurrence of stroke at any point during the life of the participant's biological father.                                                | 0. Never had stroke   1. Ever had stroke   2. Presumed - Never had stroke                                                                                                                                        |
| DIS_STROKE_M_EVER              | Lifetime occurrence of stroke in mother                  | Occurrence of stroke at any point during the life of the participant's biological mother.                                                | 0. Never had stroke   1. Ever had stroke   2. Presumed - Never had stroke                                                                                                                                        |
| DIS_STROKE_SIB_EVER            | Lifetime occurrence of stroke in siblings                | Occurrence of stroke at any point during the life of the participant's biological siblings (one or two common parents).                  | 0. Never had stroke   1. Ever had stroke   2. Presumed - Never had stroke                                                                                                                                        |
| DIS_STROKE_SIB_NUM             | Number of siblings with stroke                           | Total number of participant's biological siblings (one or two common parents) with stroke.                                               | NA                                                                                                                                                                                                               |
| DIS_STROKE_TX                  | Currently under treatment for stroke                     | Indicator of whether the participant is currently under treatment for stroke.                                                            | 0. Not currently under treatment for stroke   1. Currently under treatment for stroke   2. Presumed - Not currently under treatment for stroke   -7. Not Applicable                                              |
| <b>Diseases-Nervous system</b> |                                                          |                                                                                                                                          |                                                                                                                                                                                                                  |
| DIS_MS_AGE                     | Age at first diagnosis of multiple sclerosis             | Age of the participant at first diagnosis of multiple sclerosis.                                                                         | -7. Not Applicable                                                                                                                                                                                               |
| DIS_MS_CHILD_EVER              | Lifetime occurrence of multiple sclerosis in children    | Occurrence of multiple sclerosis at any point during the life of the participant's biological children.                                  | 0. Never had multiple sclerosis   1. Ever had multiple sclerosis   2. Presumed - Never had multiple sclerosis                                                                                                    |
| DIS_MS_CHILD_NUM               | Number of children with multiple sclerosis               | Total number of participant's biological children with multiple sclerosis.                                                               | NA                                                                                                                                                                                                               |
| DIS_MS_EVER                    | Lifetime occurrence of multiple sclerosis                | Occurrence of multiple sclerosis at any point during the life of the participant.                                                        | 0. Never had multiple sclerosis   1. Ever had multiple sclerosis   2. Presumed - Never had multiple sclerosis                                                                                                    |

**Appendix 1 (as supplied by the authors): List of the Health and Risk Factor Questionnaire DataSchema variables (Version 2.0 - Oct. 2017)**

| Variable                        | label                                                                          | Description                                                                                                                                                                           | Categories                                                                                                                                   |
|---------------------------------|--------------------------------------------------------------------------------|---------------------------------------------------------------------------------------------------------------------------------------------------------------------------------------|----------------------------------------------------------------------------------------------------------------------------------------------|
| DIS_MS_FAM_EVER                 | Family history of multiple sclerosis                                           | Occurrence of multiple sclerosis at any point during the life of the participant's relatives (father, mother, siblings and children).                                                 | 0. No family history of multiple sclerosis   1. Family history of multiple sclerosis   2. Presumed - No family history of multiple sclerosis |
| DIS_MS_F_EVER                   | Lifetime occurrence of multiple sclerosis in father                            | Occurrence of multiple sclerosis at any point during the life of the participant's biological father.                                                                                 | 0. Never had multiple sclerosis   1. Ever had multiple sclerosis   2. Presumed - Never had multiple sclerosis                                |
| DIS_MS_M_EVER                   | Lifetime occurrence of multiple sclerosis in mother                            | Occurrence of multiple sclerosis at any point during the life of the participant's biological mother.                                                                                 | 0. Never had multiple sclerosis   1. Ever had multiple sclerosis   2. Presumed - Never had multiple sclerosis                                |
| DIS_MS_SIB_EVER                 | Lifetime occurrence of multiple sclerosis in siblings                          | Occurrence of multiple sclerosis at any point during the life of the participant's biological siblings (one or two common parents).                                                   | 0. Never had multiple sclerosis   1. Ever had multiple sclerosis   2. Presumed - Never had multiple sclerosis                                |
| DIS_MS_SIB_NUM                  | Number of siblings with multiple sclerosis                                     | Total number of participant's biological siblings (one or two common parents) with multiple sclerosis.                                                                                | NA                                                                                                                                           |
| <b>Diseases-Mental behavior</b> |                                                                                |                                                                                                                                                                                       |                                                                                                                                              |
| DIS_DEP_AGE                     | Age at first diagnosis of major depression onset                               | Age of the participant at first diagnosis of major depression.                                                                                                                        | -7. Not Applicable                                                                                                                           |
| DIS_DEP_CHILD_EVER              | Lifetime occurrence of major depression in children                            | Occurrence of major depression at any point during the life of the participant's biological children.                                                                                 | 0. Never had major depression   1. Ever had major depression   2. Presumed - Never had major depression                                      |
| DIS_DEP_CHILD_NUM               | Number of children with major depression                                       | Total number of participant's biological children with major depression.                                                                                                              | NA                                                                                                                                           |
| DIS_DEP_EVER                    | Lifetime occurrence of major depression                                        | Occurrence of major depression at any point during the life of the participant.                                                                                                       | 0. Never had major depression   1. Ever had major depression   2. Presumed - Never had major depression                                      |
| DIS_DEP_FAM_EVER                | Family history of major depression                                             | Occurrence of major depression at any point during the life of the participant's relatives (father, mother, siblings and children).                                                   | 0. No family history of major depression   1. Family history of major depression   2. Presumed - No family history of major depression       |
| DIS_DEP_F_EVER                  | Lifetime occurrence of major depression in father                              | Occurrence of major depression at any point during the life of the participant's biological father.                                                                                   | 0. Never had major depression   1. Ever had major depression   2. Presumed - Never had major depression                                      |
| DIS_DEP_M_EVER                  | Lifetime occurrence of major depression in mother                              | Occurrence of major depression at any point during the life of the participant's biological mother.                                                                                   | 0. Never had major depression   1. Ever had major depression   2. Presumed - Never had major depression                                      |
| DIS_DEP_SIB_EVER                | Lifetime occurrence of major depression in siblings                            | Occurrence of major depression at any point during the life of the participant's biological siblings (one or two common parents).                                                     | 0. Never had major depression   1. Ever had major depression   2. Presumed - Never had major depression                                      |
| DIS_DEP_SIB_NUM                 | Number of siblings with major depression                                       | Total number of participant's biological siblings (one or two common parents) with major depression.                                                                                  | NA                                                                                                                                           |
| <b>Diseases-Musculoskeletal</b> |                                                                                |                                                                                                                                                                                       |                                                                                                                                              |
| DIS_ARTHRITIS_AGE               | Age at first diagnosis of arthritis                                            | Age of the participant at first diagnosis of arthritis.                                                                                                                               | -7. Not Applicable                                                                                                                           |
| DIS_ARTHRITIS_CHILD_EVER        | Lifetime occurrence of arthritis in children                                   | Occurrence of arthritis at any point during the life of the participant's biological children.                                                                                        | 0. Never had arthritis   1. Ever had arthritis   2. Presumed - Never had arthritis                                                           |
| DIS_ARTHRITIS_CHILD_NUM         | Number of children with arthritis                                              | Total number of participant's biological children with arthritis.                                                                                                                     | NA                                                                                                                                           |
| DIS_ARTHRITIS_EVER              | Lifetime occurrence of arthritis                                               | Occurrence of arthritis at any point during the life of the participant.                                                                                                              | 0. Never had arthritis   1. Ever had arthritis   2. Presumed - Never had arthritis                                                           |
| DIS_ARTHRITIS_FAM_EVER          | Family history of arthritis                                                    | Occurrence of arthritis at any point during the life of the participant's relatives (father, mother, siblings and children).                                                          | 0. No family history of arthritis   1. Family history of arthritis   2. Presumed - No family history of arthritis                            |
| DIS_ARTHRITIS_F_EVER            | Lifetime occurrence of arthritis in father                                     | Occurrence of arthritis at any point during the life of the participant's biological father.                                                                                          | 0. Never had arthritis   1. Ever had arthritis   2. Presumed - Never had arthritis                                                           |
| DIS_ARTHRITIS_M_EVER            | Lifetime occurrence of arthritis in mother                                     | Occurrence of arthritis at any point during the life of the participant's biological mother.                                                                                          | 0. Never had arthritis   1. Ever had arthritis   2. Presumed - Never had arthritis                                                           |
| DIS_ARTHRITIS_SIB_EVER          | Lifetime occurrence of arthritis in siblings                                   | Occurrence of arthritis at any point during the life of the participant's biological siblings (one or two common parents).                                                            | 0. Never had arthritis   1. Ever had arthritis   2. Presumed - Never had arthritis                                                           |
| DIS_ARTHRITIS_SIB_NUM           | Number of siblings with arthritis                                              | Total number of participant's biological siblings (one or two common parents) with arthritis.                                                                                         | NA                                                                                                                                           |
| DIS_ARTHRITIS_TYPE1             | Arthritis type (rheumatoid arthritis, osteoarthritis, other type of arthritis) | Type of arthritis diagnosed (rheumatoid arthritis or osteoarthritis or other type of arthritis). The participant could specify what other type of arthritis in an open text variable. | 1. Rheumatoid arthritis   2. Osteoarthritis   3. Other type of arthritis   -7. Not applicable                                                |
| DIS_ARTHRITIS_TYPE2             | Arthritis type (rheumatoid arthritis, osteoarthritis, other type of arthritis) | Type of arthritis diagnosed (rheumatoid arthritis or osteoarthritis or other type of arthritis). The participant could specify what other type of arthritis in an open text variable. | 1. Rheumatoid arthritis   2. Osteoarthritis   3. Other type of arthritis   -7. Not applicable                                                |
| DIS_ARTHRITIS_TYPE3             | Arthritis type (rheumatoid arthritis, osteoarthritis, other type of arthritis) | Type of arthritis diagnosed (rheumatoid arthritis or osteoarthritis or other type of arthritis). The participant could specify what other type of arthritis in an open text variable. | 1. Rheumatoid arthritis   2. Osteoarthritis   3. Other type of arthritis   -7. Not applicable                                                |

**Appendix 1 (as supplied by the authors): List of the Health and Risk Factor Questionnaire DataSchema variables (Version 2.0 - Oct. 2017)**

| Variable                            | label                                                           | Description                                                                                                                                                                                                                   | Categories                                                                                                                                                                 |
|-------------------------------------|-----------------------------------------------------------------|-------------------------------------------------------------------------------------------------------------------------------------------------------------------------------------------------------------------------------|----------------------------------------------------------------------------------------------------------------------------------------------------------------------------|
| DIS_ARTHRITIS_TYPE_OTSP             | Lifetime occurrence of arthritis, other specify                 | Name of other type of arthritis diagnosed. The following arthritis type were collected (rheumatoid arthritis, osteoarthritis and other type). The participant could specify what other type of arthritis in an open variable. | NA                                                                                                                                                                         |
| DIS_OP_AGE                          | Age at first diagnosis of osteoporosis                          | Age of the participant at first diagnosis of osteoporosis.                                                                                                                                                                    | -7. Not Applicable                                                                                                                                                         |
| DIS_OP_CHILD_EVER                   | Lifetime occurrence of osteoporosis in children                 | Occurrence of osteoporosis at any point during the life of the participant's biological children.                                                                                                                             | 0. Never had osteoporosis   1. Ever had osteoporosis   2. Presumed - Never had osteoporosis                                                                                |
| DIS_OP_CHILD_NUM                    | Number of children with osteoporosis                            | Total number of participant's biological children with osteoporosis.                                                                                                                                                          | NA                                                                                                                                                                         |
| DIS_OP_EVER                         | Lifetime occurrence of osteoporosis                             | Occurrence of osteoporosis at any point during the life of the participant.                                                                                                                                                   | 0. Never had osteoporosis   1. Ever had osteoporosis   2. Presumed - Never had osteoporosis                                                                                |
| DIS_OP_FAM_EVER                     | Family history of osteoporosis                                  | Occurrence of osteoporosis at any point during the life of the participant's relatives (father, mother, siblings and children).                                                                                               | 0. No family history of osteoporosis   1. Family history of osteoporosis   2. Presumed - No family history of osteoporosis                                                 |
| DIS_OP_F_EVER                       | Lifetime occurrence of osteoporosis in father                   | Occurrence of osteoporosis at any point during the life of the participant's biological father.                                                                                                                               | 0. Never had osteoporosis   1. Ever had osteoporosis   2. Presumed - Never had osteoporosis                                                                                |
| DIS_OP_M_EVER                       | Lifetime occurrence of osteoporosis in mother                   | Occurrence of osteoporosis at any point during the life of the participant's biological mother.                                                                                                                               | 0. Never had osteoporosis   1. Ever had osteoporosis   2. Presumed - Never had osteoporosis                                                                                |
| DIS_OP_SIB_EVER                     | Lifetime occurrence of osteoporosis in siblings                 | Occurrence of osteoporosis at any point during the life of the participant's biological siblings (one or two common parents).                                                                                                 | 0. Never had osteoporosis   1. Ever had osteoporosis   2. Presumed - Never had osteoporosis                                                                                |
| DIS_OP_SIB_NUM                      | Number of siblings with osteoporosis                            | Total number of participant's biological siblings (one or two common parents) with osteoporosis.                                                                                                                              | NA                                                                                                                                                                         |
| DIS_SLE_AGE                         | Age at first diagnosis of systemic lupus erythematosus          | Age of the participant at first diagnosis of systemic lupus erythematosus.                                                                                                                                                    | -7. Not Applicable                                                                                                                                                         |
| DIS_SLE_CHILD_EVER                  | Lifetime occurrence of systemic lupus erythematosus in children | Occurrence of systemic lupus erythematosus at any point during the life of the participant's biological children.                                                                                                             | 0. Never had systemic lupus erythematosus   1. Ever had systemic lupus erythematosus   2. Presumed - Never had systemic lupus erythematosus                                |
| DIS_SLE_CHILD_NUM                   | Number of children with systemic lupus erythematosus            | Total number of participant's biological children with systemic lupus erythematosus.                                                                                                                                          | NA                                                                                                                                                                         |
| DIS_SLE_EVER                        | Lifetime occurrence of systemic lupus erythematosus             | Occurrence of systemic lupus erythematosus at any point during the life of the participant.                                                                                                                                   | 0. Never had systemic lupus erythematosus   1. Ever had systemic lupus erythematosus   2. Presumed - Never had systemic lupus erythematosus                                |
| DIS_SLE_FAM_EVER                    | Family history of systemic lupus erythematosus                  | Occurrence of systemic lupus erythematosus at any point during the life of the participant's relatives (father, mother, siblings and children).                                                                               | 0. No family history of systemic lupus erythematosus   1. Family history of systemic lupus erythematosus   2. Presumed - No family history of systemic lupus erythematosus |
| DIS_SLE_F_EVER                      | Lifetime occurrence of systemic lupus erythematosus in father   | Occurrence of systemic lupus erythematosus at any point during the life of the participant's biological father.                                                                                                               | 0. Never had systemic lupus erythematosus   1. Ever had systemic lupus erythematosus   2. Presumed - Never had systemic lupus erythematosus                                |
| DIS_SLE_M_EVER                      | Lifetime occurrence of systemic lupus erythematosus in mother   | Occurrence of systemic lupus erythematosus at any point during the life of the participant's biological mother.                                                                                                               | 0. Never had systemic lupus erythematosus   1. Ever had systemic lupus erythematosus   2. Presumed - Never had systemic lupus erythematosus                                |
| DIS_SLE_SIB_EVER                    | Lifetime occurrence of systemic lupus erythematosus in siblings | Occurrence of systemic lupus erythematosus at any point during the life of the participant's biological siblings (one or two common parents).                                                                                 | 0. Never had systemic lupus erythematosus   1. Ever had systemic lupus erythematosus   2. Presumed - Never had systemic lupus erythematosus                                |
| DIS_SLE_SIB_NUM                     | Number of siblings with systemic lupus erythematosus            | Total number of participant's biological siblings (one or two common parents) with systemic lupus erythematosus.                                                                                                              | NA                                                                                                                                                                         |
| <b>Diseases-Endocrine metabolic</b> |                                                                 |                                                                                                                                                                                                                               |                                                                                                                                                                            |
| DIS_DIAB_AGE                        | Age at first diagnosis of diabetes                              | Age of the participant at first diagnosis of diabetes.                                                                                                                                                                        | -7. Not Applicable                                                                                                                                                         |
| DIS_DIAB_CHILD_EVER                 | Lifetime occurrence of diabetes in children                     | Occurrence of diabetes at any point during the life of the participant's biological children.                                                                                                                                 | 0. Ever had diabetes   1. Never had diabetes   2. Presumed - Never had diabetes                                                                                            |
| DIS_DIAB_CHILD_NUM                  | Number of children with diabetes                                | Total number of participant's biological children with diabetes.                                                                                                                                                              | NA                                                                                                                                                                         |
| DIS_DIAB_EVER                       | Lifetime occurrence of diabetes                                 | Occurrence of diabetes at any point during the life of the participant.                                                                                                                                                       | 0. Never had diabetes   1. Ever had diabetes   2. Presumed - Never had diabetes                                                                                            |
| DIS_DIAB_FAM_EVER                   | Family history of diabetes                                      | Occurrence of diabetes at any point during the life of the participant's relatives (father, mother, siblings and children).                                                                                                   | 0. No family history of diabetes   1. Family history of diabetes   2. Presumed - No family history of diabetes                                                             |
| DIS_DIAB_F_EVER                     | Lifetime occurrence of diabetes in father                       | Occurrence of diabetes at any point during the life of the participant's biological father.                                                                                                                                   | 0. Ever had diabetes   1. Never had diabetes   2. Presumed - Never had diabetes                                                                                            |
| DIS_DIAB_M_EVER                     | Lifetime occurrence of diabetes in mother                       | Occurrence of diabetes at any point during the life of the participant's biological mother.                                                                                                                                   | 0. Ever had diabetes   1. Never had diabetes   2. Presumed - Never had diabetes                                                                                            |
| DIS_DIAB_SIB_EVER                   | Lifetime occurrence of diabetes in siblings                     | Occurrence of diabetes at any point during the life of the participant's biological siblings (one or two common parents).                                                                                                     | 0. Ever had diabetes   1. Never had diabetes   2. Presumed - Never had diabetes                                                                                            |
| DIS_DIAB_SIB_NUM                    | Number of siblings with diabetes                                | Total number of participant's biological siblings (one or two common parents) with diabetes.                                                                                                                                  | NA                                                                                                                                                                         |

**Appendix 1 (as supplied by the authors): List of the Health and Risk Factor Questionnaire DataSchema variables (Version 2.0 - Oct. 2017)**

| Variable                           | label                                                                    | Description                                                                                                                                                                                    | Categories                                                                                                                                                                                            |
|------------------------------------|--------------------------------------------------------------------------|------------------------------------------------------------------------------------------------------------------------------------------------------------------------------------------------|-------------------------------------------------------------------------------------------------------------------------------------------------------------------------------------------------------|
| DIS_DIAB_TX                        | Currently under treatment for diabetes                                   | Indicator of whether the participant is currently under treatment for diabetes.                                                                                                                | 0. Not currently under treatment for diabetes   1. Currently under treatment for diabetes   2. Presumed - Not currently under treatment for diabetes   -7. Not Applicable                             |
| DIS_DIAB_TYPE                      | Lifetime diabetes type                                                   | Type of diabetes diagnosed (type 1 or type 2 or gestational diabetes - female only).                                                                                                           | 1. Diabetes mellitus type 1   2. Diabetes mellitus type 2   3. Gestational diabetes only   -7. Not Applicable                                                                                         |
| <b>Diseases-Respiratory system</b> |                                                                          |                                                                                                                                                                                                |                                                                                                                                                                                                       |
| DIS_ASTHMA_AGE                     | Age at first diagnosis of asthma                                         | Age of the participant at first diagnosis of asthma.                                                                                                                                           | -7. Not Applicable                                                                                                                                                                                    |
| DIS_ASTHMA_CHILD_EVER              | Lifetime occurrence of asthma in children                                | Occurrence of asthma at any point during the life of the participant's biological children.                                                                                                    | 0. Never had asthma   1. Ever had asthma   2. Presumed - Never had asthma                                                                                                                             |
| DIS_ASTHMA_CHILD_NUM               | Number of children with asthma                                           | Total number of participant's biological children with asthma.                                                                                                                                 | NA                                                                                                                                                                                                    |
| DIS_ASTHMA_EVER                    | Lifetime occurrence of asthma                                            | Occurrence of asthma at any point during the life of the participant.                                                                                                                          | 0. Never had asthma   1. Ever had asthma   2. Presumed - Never had asthma                                                                                                                             |
| DIS_ASTHMA_FAM_EVER                | Family history of asthma                                                 | Occurrence of asthma at any point during the life of the participant's relatives (father, mother, siblings and children).                                                                      | 0. No family history of asthma   1. Family history of asthma   2. Presumed - No family history of asthma                                                                                              |
| DIS_ASTHMA_F_EVER                  | Lifetime occurrence of asthma in father                                  | Occurrence of asthma at any point during the life of the participant's biological father.                                                                                                      | 0. Never had asthma   1. Ever had asthma   2. Presumed - Never had asthma                                                                                                                             |
| DIS_ASTHMA_M_EVER                  | Lifetime occurrence of asthma in mother                                  | Occurrence of asthma at any point during the life of the participant's biological mother.                                                                                                      | 0. Never had asthma   1. Ever had asthma   2. Presumed - Never had asthma                                                                                                                             |
| DIS_ASTHMA_SIB_EVER                | Lifetime occurrence of asthma in siblings                                | Occurrence of asthma at any point during the life of the participant's biological siblings (one or two common parents).                                                                        | 0. Never had asthma   1. Ever had asthma   2. Presumed - Never had asthma                                                                                                                             |
| DIS_ASTHMA_SIB_NUM                 | Number of siblings with asthma                                           | Total number of participant's biological siblings (one or two common parents) with asthma.                                                                                                     | NA                                                                                                                                                                                                    |
| DIS_ASTHMA_TX                      | Currently under treatment for asthma                                     | Indicator of whether the participant is currently under treatment for asthma.                                                                                                                  | 0. Not currently under treatment for asthma   1. Currently under treatment for asthma   2. Presumed - Not currently under treatment for asthma   -7. Not Applicable                                   |
| DIS_CB_AGE                         | Age at first diagnosis of chronic bronchitis                             | Age of the participant at first diagnosis of chronic bronchitis.                                                                                                                               | -7. Not Applicable                                                                                                                                                                                    |
| DIS_CB_CHILD_EVER                  | Lifetime occurrence of chronic bronchitis in children                    | Occurrence of chronic bronchitis at any point during the life of the participant's biological children.                                                                                        | 0. Never had chronic bronchitis   1. Ever had chronic bronchitis   2. Presumed - Never had chronic bronchitis                                                                                         |
| DIS_CB_CHILD_NUM                   | Number of children with chronic bronchitis                               | Total number of participant's biological children with chronic bronchitis.                                                                                                                     | NA                                                                                                                                                                                                    |
| DIS_CB_EVER                        | Lifetime occurrence of chronic bronchitis                                | Occurrence of chronic bronchitis at any point during the life of the participant.                                                                                                              | 0. Never had chronic bronchitis   1. Ever had chronic bronchitis   2. Presumed - Never had chronic bronchitis                                                                                         |
| DIS_CB_FAM_EVER                    | Family history of chronic bronchitis                                     | Occurrence of chronic bronchitis at any point during the life of the participant's relatives (father, mother, siblings and children).                                                          | 0. No family history of chronic bronchitis   1. Family history of chronic bronchitis   2. Presumed - No family history of chronic bronchitis                                                          |
| DIS_CB_F_EVER                      | Lifetime occurrence of chronic bronchitis in father                      | Occurrence of chronic bronchitis at any point during the life of the participant's biological father.                                                                                          | 0. Never had chronic bronchitis   1. Ever had chronic bronchitis   2. Presumed - Never had chronic bronchitis                                                                                         |
| DIS_CB_M_EVER                      | Lifetime occurrence of chronic bronchitis in mother                      | Occurrence of chronic bronchitis at any point during the life of the participant's biological mother.                                                                                          | 0. Never had chronic bronchitis   1. Ever had chronic bronchitis   2. Presumed - Never had chronic bronchitis                                                                                         |
| DIS_CB_SIB_EVER                    | Lifetime occurrence of chronic bronchitis in siblings                    | Occurrence of chronic bronchitis at any point during the life of the participant's biological siblings (one or two common parents).                                                            | 0. Never had chronic bronchitis   1. Ever had chronic bronchitis   2. Presumed - Never had chronic bronchitis                                                                                         |
| DIS_CB_SIB_NUM                     | Number of siblings with chronic bronchitis                               | Total number of participant's biological siblings (one or two common parents) with chronic bronchitis.                                                                                         | NA                                                                                                                                                                                                    |
| DIS_CB_TX                          | Currently under treatment for chronic bronchitis                         | Indicator of whether the participant is currently under treatment for chronic bronchitis.                                                                                                      | 0. Not currently under treatment for chronic bronchitis   1. Currently under treatment for chronic bronchitis   -7. Not Applicable                                                                    |
| DIS_COPD_AGE                       | Age at first diagnosis of chronic obstructive pulmonary disease          | Age of the participant at first diagnosis of chronic obstructive pulmonary disease.                                                                                                            | -7. Not Applicable                                                                                                                                                                                    |
| DIS_COPD_CHILD_EVER                | Lifetime occurrence of chronic obstructive pulmonary disease in children | Occurrence of chronic obstructive pulmonary disease at any point during the life of the participant's biological children.                                                                     | 0. Never had chronic obstructive pulmonary disease   1. Ever had chronic obstructive pulmonary disease   2. Presumed - Never had chronic obstructive pulmonary disease                                |
| DIS_COPD_CHILD_NUM                 | Number of children with chronic obstructive pulmonary disease            | Total number of participant's biological children with chronic obstructive pulmonary disease.                                                                                                  | NA                                                                                                                                                                                                    |
| DIS_COPD_EVER                      | Lifetime occurrence of chronic obstructive pulmonary disease             | Occurrence of chronic obstructive pulmonary disease at any point during the life of the participant.<br><br>Includes: chronic obstructive pulmonary disease, chronic bronchitis and emphysema. | 0. Never had chronic obstructive pulmonary disease   1. Ever had chronic obstructive pulmonary disease   2. Presumed - Never had chronic obstructive pulmonary disease                                |
| DIS_COPD_FAM_EVER                  | Family history of chronic obstructive pulmonary disease                  | Occurrence of chronic obstructive pulmonary disease at any point during the life of the participant's relatives (father, mother, siblings and children).                                       | 0. No family history of chronic obstructive pulmonary disease   1. Family history of chronic obstructive pulmonary disease   2. Presumed - No family history of chronic obstructive pulmonary disease |
| DIS_COPD_F_EVER                    | Lifetime occurrence of chronic obstructive pulmonary disease in father   | Occurrence of chronic obstructive pulmonary disease at any point during the life of the participant's biological father.                                                                       | 0. Never had chronic obstructive pulmonary disease   1. Ever had chronic obstructive pulmonary disease   2. Presumed - Never had chronic obstructive pulmonary disease                                |

**Appendix 1 (as supplied by the authors): List of the Health and Risk Factor Questionnaire DataSchema variables (Version 2.0 - Oct. 2017)**

| Variable                          | label                                                                    | Description                                                                                                                                            | Categories                                                                                                                                                                                                                                                       |
|-----------------------------------|--------------------------------------------------------------------------|--------------------------------------------------------------------------------------------------------------------------------------------------------|------------------------------------------------------------------------------------------------------------------------------------------------------------------------------------------------------------------------------------------------------------------|
| DIS_COPD_M_EVER                   | Lifetime occurrence of chronic obstructive pulmonary disease in mother   | Occurrence of chronic obstructive pulmonary disease at any point during the life of the participant's biological mother.                               | 0. Never had chronic obstructive pulmonary disease   1. Ever had chronic obstructive pulmonary disease   2. Presumed - Never had chronic obstructive pulmonary disease                                                                                           |
| DIS_COPD_SIB_EVER                 | Lifetime occurrence of chronic obstructive pulmonary disease in siblings | Occurrence of chronic obstructive pulmonary disease at any point during the life of the participant's biological siblings (one or two common parents). | 0. Never had chronic obstructive pulmonary disease   1. Ever had chronic obstructive pulmonary disease   2. Presumed - Never had chronic obstructive pulmonary disease                                                                                           |
| DIS_COPD_SIB_NUM                  | Number of siblings with chronic obstructive pulmonary disease            | Total number of participant's biological siblings (one or two common parents) with chronic obstructive pulmonary disease.                              | NA                                                                                                                                                                                                                                                               |
| DIS_COPD_TX                       | Currently under treatment for chronic obstructive pulmonary disease      | Indicator of whether the participant is currently under treatment for chronic obstructive pulmonary disease.                                           | 0. Not currently under treatment for chronic obstructive pulmonary disease   1. Currently under treatment for chronic obstructive pulmonary disease   2. Presumed - Not currently under treatment for chronic obstructive pulmonary disease   -7. Not Applicable |
| DIS_EMPHYSEMA_AGE                 | Age at first diagnosis of emphysema                                      | Age of the participant at first diagnosis of emphysema.                                                                                                | -7. Not Applicable                                                                                                                                                                                                                                               |
| DIS_EMPHYSEMA_CHILD_EVER          | Lifetime occurrence of emphysema in children                             | Indicator of whether the participant is currently under treatment for chronic obstructive pulmonary disease.                                           | 0. Never had emphysema   1. Ever had emphysema   2. Presumed - Never had emphysema                                                                                                                                                                               |
| DIS_EMPHYSEMA_CHILD_NUM           | Number of children with emphysema                                        | Total number of participant's biological children with emphysema.                                                                                      | NA                                                                                                                                                                                                                                                               |
| DIS_EMPHYSEMA_EVER                | Lifetime occurrence of emphysema                                         | Occurrence of emphysema at any point during the life of the participant.                                                                               | 0. Never had emphysema   1. Ever had emphysema   2. Presumed - Never had emphysema                                                                                                                                                                               |
| DIS_EMPHYSEMA_FAM_EVER            | Family history of emphysema                                              | Occurrence of emphysema at any point during the life of the participant's relatives (father, mother, siblings and children).                           | 0. No family history of emphysema   1. Family history of emphysema   2. Presumed - No family history of emphysema                                                                                                                                                |
| DIS_EMPHYSEMA_F_EVER              | Lifetime occurrence of emphysema in father                               | Occurrence of emphysema at any point during the life of the participant's biological father.                                                           | 0. Never had emphysema   1. Ever had emphysema   2. Presumed - Never had emphysema                                                                                                                                                                               |
| DIS_EMPHYSEMA_M_EVER              | Lifetime occurrence of emphysema in mother                               | Occurrence of emphysema at any point during the life of the participant's biological mother.                                                           | 0. Never had emphysema   1. Ever had emphysema   2. Presumed - Never had emphysema                                                                                                                                                                               |
| DIS_EMPHYSEMA_SIB_EVER            | Lifetime occurrence of emphysema in siblings                             | Occurrence of emphysema at any point during the life of the participant's biological siblings (one or two common parents).                             | 0. Never had emphysema   1. Ever had emphysema   2. Presumed - Never had emphysema                                                                                                                                                                               |
| DIS_EMPHYSEMA_SIB_NUM             | Number of siblings with emphysema                                        | Total number of participant's biological siblings (one or two common parents) with emphysema.                                                          | NA                                                                                                                                                                                                                                                               |
| DIS_EMPHYSEMA_TX                  | Currently under treatment for emphysema                                  | Indicator of whether the participant is currently under treatment for emphysema.                                                                       | 0. Not currently under treatment for emphysema   1. Currently under treatment for emphysema   2. Presumed - Not currently under treatment for emphysema   -7. Not Applicable                                                                                     |
| <b>Diseases-Skin subcutaneous</b> |                                                                          |                                                                                                                                                        |                                                                                                                                                                                                                                                                  |
| DIS_ECZEMA_AGE                    | Age at first diagnosis of eczema                                         | Age of the participant at first diagnosis of eczema.                                                                                                   | -7. Not Applicable                                                                                                                                                                                                                                               |
| DIS_ECZEMA_CHILD_EVER             | Lifetime occurrence of eczema in children                                | Occurrence of eczema at any point during the life of the participant's biological children.                                                            | 0. Never had eczema   1. Ever had eczema   2. Presumed - Never had eczema                                                                                                                                                                                        |
| DIS_ECZEMA_CHILD_NUM              | Number of children with eczema                                           | Total number of participant's biological children with eczema.                                                                                         | NA                                                                                                                                                                                                                                                               |
| DIS_ECZEMA_EVER                   | Lifetime occurrence of eczema                                            | Occurrence of eczema at any point during the life of the participant.                                                                                  | 0. Never had eczema   1. Ever had eczema   2. Presumed - Never had eczema                                                                                                                                                                                        |
| DIS_ECZEMA_FAM_EVER               | Family history of eczema                                                 | Occurrence of eczema at any point during the life of the participant's relatives (father, mother, siblings and children).                              | 0. No family history of eczema   1. Family history of eczema   2. Presumed - No family history of eczema                                                                                                                                                         |
| DIS_ECZEMA_F_EVER                 | Lifetime occurrence of eczema in father                                  | Occurrence of eczema at any point during the life of the participant's biological father.                                                              | 0. Never had eczema   1. Ever had eczema   2. Presumed - Never had eczema                                                                                                                                                                                        |
| DIS_ECZEMA_M_EVER                 | Lifetime occurrence of eczema in mother                                  | Occurrence of eczema at any point during the life of the participant's biological mother.                                                              | 0. Never had eczema   1. Ever had eczema   2. Presumed - Never had eczema                                                                                                                                                                                        |
| DIS_ECZEMA_SIB_EVER               | Lifetime occurrence of eczema in siblings                                | Occurrence of eczema at any point during the life of the participant's biological siblings (one or two common parents).                                | 0. Never had eczema   1. Ever had eczema   2. Presumed - Never had eczema                                                                                                                                                                                        |
| DIS_ECZEMA_SIB_NUM                | Number of siblings with eczema                                           | Total number of participant's biological siblings (one or two common parents) with eczema.                                                             | NA                                                                                                                                                                                                                                                               |
| DIS_PS_AGE                        | Age at first diagnosis of psoriasis                                      | Age of the participant at first diagnosis of psoriasis                                                                                                 | -7. Not Applicable                                                                                                                                                                                                                                               |
| DIS_PS_CHILD_EVER                 | Lifetime occurrence of psoriasis in children                             | Occurrence of psoriasis at any point during the life of the participant's biological children.                                                         | 0. Never had psoriasis   1. Ever had psoriasis   2. Presumed - Never had psoriasis                                                                                                                                                                               |
| DIS_PS_CHILD_NUM                  | Number of children with psoriasis                                        | Total number of participant's biological children with psoriasis.                                                                                      | NA                                                                                                                                                                                                                                                               |
| DIS_PS_EVER                       | Lifetime occurrence of psoriasis                                         | Occurrence of psoriasis at any point during the life of the participant.                                                                               | 0. Never had psoriasis   1. Ever had psoriasis   2. Presumed - Never had psoriasis                                                                                                                                                                               |
| DIS_PS_FAM_EVER                   | Family history of psoriasis                                              | Occurrence of psoriasis at any point during the life of the participant's relatives (father, mother, siblings and children).                           | 0. No family history of psoriasis   1. Family history of psoriasis   2. Presumed - No family history of psoriasis                                                                                                                                                |
| DIS_PS_F_EVER                     | Lifetime occurrence of psoriasis in father                               | Occurrence of psoriasis at any point during the life of the participant's biological father.                                                           | 0. Never had psoriasis   1. Ever had psoriasis   2. Presumed - Never had psoriasis                                                                                                                                                                               |
| DIS_PS_M_EVER                     | Lifetime occurrence of psoriasis in mother                               | Occurrence of psoriasis at any point during the life of the participant's biological mother.                                                           | 0. Never had psoriasis   1. Ever had psoriasis   2. Presumed - Never had psoriasis                                                                                                                                                                               |

**Appendix 1 (as supplied by the authors): List of the Health and Risk Factor Questionnaire DataSchema variables (Version 2.0 - Oct. 2017)**

| Variable                                                                        | label                                                                  | Description                                                                                                                | Categories                                                                                                                                                                               |
|---------------------------------------------------------------------------------|------------------------------------------------------------------------|----------------------------------------------------------------------------------------------------------------------------|------------------------------------------------------------------------------------------------------------------------------------------------------------------------------------------|
| DIS_PS_SIB_EVER                                                                 | Lifetime occurrence of psoriasis in siblings                           | Occurrence of psoriasis at any point during the life of the participant's biological siblings (one or two common parents). | 0. Never had psoriasis   1. Ever had psoriasis   2. Presumed - Never had psoriasis                                                                                                       |
| DIS_PS_SIB_NUM                                                                  | Number of siblings with psoriasis                                      | Total number of participant's biological siblings (one or two common parents) with psoriasis.                              | NA                                                                                                                                                                                       |
| <b>Medication supplements</b>                                                   |                                                                        |                                                                                                                            |                                                                                                                                                                                          |
| ATC_1                                                                           | Chemical substance, 5th level of ATC classification - medication 1     | Chemical substance of medication 1, 5th level of the ATC classification system                                             | NA                                                                                                                                                                                       |
| ATC_1_L1                                                                        | Anatomical main group, 1st level of ATC classification - medication 1  | Anatomical main group of medication 1, 1st level of ATC classification system                                              | NA                                                                                                                                                                                       |
| ATC_2                                                                           | Chemical substance, 5th level of ATC classification - medication 2     | Chemical substance of medication 2, 5th level of the ATC classification system                                             | NA                                                                                                                                                                                       |
| ATC_2_L1                                                                        | Anatomical main group, 1st level of ATC classification - medication 2  | Anatomical main group of medication 2, 1st level of ATC classification system                                              | NA                                                                                                                                                                                       |
| ATC_3                                                                           | Chemical substance, 5th level of ATC classification - medication 3     | Chemical substance of medication 3, 5th level of the ATC classification system                                             | NA                                                                                                                                                                                       |
| ATC_3_L1                                                                        | Anatomical main group, 1st level of ATC classification - medication 3  | Anatomical main group of medication 3, 1st level of ATC classification system                                              | NA                                                                                                                                                                                       |
| ATC_4                                                                           | Chemical substance, 5th level of ATC classification - medication 4     | Chemical substance of medication 4, 5th level of the ATC classification system                                             | NA                                                                                                                                                                                       |
| ATC_4_L1                                                                        | Anatomical main group, 1st level of ATC classification - medication 4  | Anatomical main group of medication 4, 1st level of ATC classification system                                              | NA                                                                                                                                                                                       |
| ATC_5                                                                           | Chemical substance, 5th level of ATC classification - medication 5     | Chemical substance of medication 5, 5th level of the ATC classification system                                             | NA                                                                                                                                                                                       |
| ATC_5_L1                                                                        | Anatomical main group, 1st level of ATC classification - medication 5  | Anatomical main group of medication 5, 1st level of ATC classification system                                              | NA                                                                                                                                                                                       |
| ATC_6                                                                           | Chemical substance, 5th level of ATC classification - medication 6     | Chemical substance of medication 6, 5th level of the ATC classification system                                             | NA                                                                                                                                                                                       |
| ATC_6_L1                                                                        | Anatomical main group, 1st level of ATC classification - medication 6  | Anatomical main group of medication 6, 1st level of ATC classification system                                              | NA                                                                                                                                                                                       |
| ATC_7                                                                           | Chemical substance, 5th level of ATC classification - medication 7     | Chemical substance of medication 7, 5th level of the ATC classification system                                             | NA                                                                                                                                                                                       |
| ATC_7_L1                                                                        | Anatomical main group, 1st level of ATC classification - medication 7  | Anatomical main group of medication 7, 1st level of ATC classification system                                              | NA                                                                                                                                                                                       |
| ATC_8                                                                           | Chemical substance, 5th level of ATC classification - medication 8     | Chemical substance of medication 8, 5th level of the ATC classification system                                             | NA                                                                                                                                                                                       |
| ATC_8_L1                                                                        | Anatomical main group, 1st level of ATC classification - medication 8  | Anatomical main group of medication 8, 1st level of ATC classification system                                              | NA                                                                                                                                                                                       |
| ATC_9                                                                           | Chemical substance, 5th level of ATC classification - medication 9     | Chemical substance of medication 9, 5th level of the ATC classification system                                             | NA                                                                                                                                                                                       |
| ATC_9_L1                                                                        | Anatomical main group, 1st level of ATC classification - medication 9  | Anatomical main group of medication 9, 1st level of ATC classification system                                              | NA                                                                                                                                                                                       |
| ATC_10                                                                          | Chemical substance, 5th level of ATC classification - medication 10    | Chemical substance of medication 10, 5th level of the ATC classification system                                            | NA                                                                                                                                                                                       |
| ATC_10_L1                                                                       | Anatomical main group, 1st level of ATC classification - medication 10 | Anatomical main group of medication 10, 1st level of ATC classification system                                             | NA                                                                                                                                                                                       |
| DIN_1                                                                           | Drug identification number (DIN) - medication 1                        | Drug identification number (DIN) of medication 1                                                                           | NA                                                                                                                                                                                       |
| DIN_2                                                                           | Drug identification number (DIN) - medication 2                        | Drug identification number (DIN) of medication 2                                                                           | NA                                                                                                                                                                                       |
| DIN_3                                                                           | Drug identification number (DIN) - medication 3                        | Drug identification number (DIN) of medication 3                                                                           | NA                                                                                                                                                                                       |
| DIN_4                                                                           | Drug identification number (DIN) - medication 4                        | Drug identification number (DIN) of medication 4                                                                           | NA                                                                                                                                                                                       |
| DIN_5                                                                           | Drug identification number (DIN) - medication 5                        | Drug identification number (DIN) of medication 5                                                                           | NA                                                                                                                                                                                       |
| DIN_6                                                                           | Drug identification number (DIN) - medication 6                        | Drug identification number (DIN) of medication 6                                                                           | NA                                                                                                                                                                                       |
| DIN_7                                                                           | Drug identification number (DIN) - medication 7                        | Drug identification number (DIN) of medication 7                                                                           | NA                                                                                                                                                                                       |
| DIN_8                                                                           | Drug identification number (DIN) - medication 8                        | Drug identification number (DIN) of medication 8                                                                           | NA                                                                                                                                                                                       |
| DIN_9                                                                           | Drug identification number (DIN) - medication 9                        | Drug identification number (DIN) of medication 9                                                                           | NA                                                                                                                                                                                       |
| DIN_10                                                                          | Drug identification number (DIN) - medication 10                       | Drug identification number (DIN) of medication 10                                                                          | NA                                                                                                                                                                                       |
| MED_1                                                                           | Name - medication 1                                                    | Name of medication 1                                                                                                       | NA                                                                                                                                                                                       |
| MED_2                                                                           | Name - medication 2                                                    | Name of medication 2                                                                                                       | NA                                                                                                                                                                                       |
| MED_3                                                                           | Name - medication 3                                                    | Name of medication 3                                                                                                       | NA                                                                                                                                                                                       |
| MED_4                                                                           | Name - medication 4                                                    | Name of medication 4                                                                                                       | NA                                                                                                                                                                                       |
| MED_5                                                                           | Name - medication 5                                                    | Name of medication 5                                                                                                       | NA                                                                                                                                                                                       |
| MED_6                                                                           | Name - medication 6                                                    | Name of medication 6                                                                                                       | NA                                                                                                                                                                                       |
| MED_7                                                                           | Name - medication 7                                                    | Name of medication 7                                                                                                       | NA                                                                                                                                                                                       |
| MED_8                                                                           | Name - medication 8                                                    | Name of medication 8                                                                                                       | NA                                                                                                                                                                                       |
| MED_9                                                                           | Name - medication 9                                                    | Name of medication 9                                                                                                       | NA                                                                                                                                                                                       |
| MED_10                                                                          | Name - medication 10                                                   | Name of medication 10                                                                                                      | NA                                                                                                                                                                                       |
| <b>Non pharmacological interventions-Other non-pharmacological intervention</b> |                                                                        |                                                                                                                            |                                                                                                                                                                                          |
| HS_COL_EVER                                                                     | Ever had colonoscopy                                                   | Indicator of whether the participant has ever had a colonoscopy.                                                           | 0. Never had a colonoscopy   1. Ever had a colonoscopy                                                                                                                                   |
| HS_COL_LAST                                                                     | Last colonoscopy                                                       | Last time the participant had a colonoscopy, if the participant has ever had a colonoscopy.                                | 1. Less than 6 months ago   2. 6 months to less than 1 year ago   3. 1 year to less than 2 years ago   4. 2 years to less than 3 years ago   5. 3 or more years ago   -7. Not Applicable |

**Appendix 1 (as supplied by the authors): List of the Health and Risk Factor Questionnaire DataSchema variables (Version 2.0 - Oct. 2017)**

| Variable                                                                | label                                         | Description                                                                                                                                             | Categories                                                                                                                                                                                                                                                                              |
|-------------------------------------------------------------------------|-----------------------------------------------|---------------------------------------------------------------------------------------------------------------------------------------------------------|-----------------------------------------------------------------------------------------------------------------------------------------------------------------------------------------------------------------------------------------------------------------------------------------|
| HS_SIG_COL_EVER                                                         | Ever had sigmoidoscopy or colonoscopy         | Indicator of whether the participant has ever had a sigmoidoscopy or a colonoscopy.                                                                     | 0. Never had a sigmoidoscopy or colonoscopy   1. Ever had a sigmoidoscopy or colonoscopy                                                                                                                                                                                                |
| HS_SIG_COL_LAST                                                         | Last sigmoidoscopy or colonoscopy             | Indicator of whether the participant has ever had a sigmoidoscopy or a colonoscopy, if the participant has ever had a sigmoidoscopy or colonoscopy.     | 1. Less than 6 months ago   2. 6 months to less than 1 year ago   3. 1 year to less than 2 years ago   4. 2 years to less than 3 years ago   5. 3 or more years ago   -7. Not Applicable                                                                                                |
| HS_SIG_EVER                                                             | Ever had sigmoidoscopy                        | Indicator of whether the participant has ever had a sigmoidoscopy.                                                                                      | 0. Never had a sigmoidoscopy   1. Ever had a sigmoidoscopy                                                                                                                                                                                                                              |
| HS_SIG_LAST                                                             | Last sigmoidoscopy                            | Last time the participant had a sigmoidoscopy, if the participant has ever had a sigmoidoscopy.                                                         | 1. Less than 6 months ago   2. 6 months to less than 1 year ago   3. 1 year to less than 2 years ago   4. 2 years to less than 3 years ago   5. 3 or more years ago   -7. Not Applicable                                                                                                |
| <b>Non pharmacological interventions-Surgical interventions</b>         |                                               |                                                                                                                                                         |                                                                                                                                                                                                                                                                                         |
| WH_BI_OOPHORECTOMY                                                      | Bilateral oophorectomy                        | Indicator of whether the ovaries were removed at the same time.                                                                                         | 0. Both ovaries not removed at the same time   1. Both ovaries removed at the same time   -7. Not Applicable                                                                                                                                                                            |
| WH_HYSTERECTOMY_AGE                                                     | Hysterectomy onset                            | Age of the female participant at hysterectomy.                                                                                                          | -7. Not Applicable                                                                                                                                                                                                                                                                      |
| WH_HYSTERECTOMY_EVER                                                    | Occurrence of hysterectomy                    | Occurrence of hysterectomy at any point during the life of the female participant.                                                                      | 0. Never had a hysterectomy   1. Ever had a hysterectomy   -7. Not Applicable                                                                                                                                                                                                           |
| WH_OOPHORECTOMY_EVER                                                    | Occurrence of oophorectomy                    | Occurrence of oophorectomy at any point during the life of the female participant.                                                                      | 0. Never had a oophorectomy   1. Ever had a oophorectomy   -7. Not Applicable                                                                                                                                                                                                           |
| WH_OVARIES_LAST_AGE                                                     | Age at last oophorectomy                      | Age of the female participant at last oophorectomy.                                                                                                     | -7. Not Applicable                                                                                                                                                                                                                                                                      |
| WH_OVARIES_REMOVED_NB                                                   | Number of ovaries removed                     | Number of ovaries removed during the life of the female participant.                                                                                    | 1. Had one ovary removed   2. Had both ovaries removed   -7. Not Applicable                                                                                                                                                                                                             |
| <b>Non pharmacological interventions-Biosample analyses</b>             |                                               |                                                                                                                                                         |                                                                                                                                                                                                                                                                                         |
| HS_FOBT_EVER                                                            | Ever had fecal occult blood test              | Indicator of whether the participant has ever had a fecal occult blood test (FOBT).                                                                     | 0. Never had a fecal occult blood test   1. Ever had a fecal occult blood test                                                                                                                                                                                                          |
| HS_FOBT_LAST                                                            | Last fecal occult blood test                  | Last time the participant had a fecal occult blood test (FOBT), if the participant has ever had a fecal occult blood test (FOBT).                       | 1. Less than 6 months ago   2. 6 months to less than 1 year ago   3. 1 year to less than 2 years ago   4. 2 years to less than 3 years ago   5. 3 or more years ago   -7. Not Applicable                                                                                                |
| HS_PAP_EVER                                                             | Ever had Pap test                             | Indicator of whether the female participant has ever had a Pap test (Pap smear).                                                                        | 0. Never had a Pap test   1. Ever had a Pap test   -7. Not Applicable                                                                                                                                                                                                                   |
| HS_PAP_LAST                                                             | Last Pap test                                 | Last time the participant had a Pap test or a smear test, if the female participant has ever had a Pap test (Pap smear).                                | 1. Less than 6 months ago   2. 6 months to less than 1 year ago   3. 1 year to less than 2 years ago   4. 2 years to less than 3 years ago   5. 3 or more years ago   -7. Not Applicable                                                                                                |
| HS_PSA_EVER                                                             | Ever had PSA blood test                       | Indicator of whether the male participant has ever had a PSA blood test for prostate cancer screening.                                                  | 0. Never had a PSA blood test   1. Ever had a PSA blood test   -7. Not Applicable                                                                                                                                                                                                       |
| HS_PSA_LAST                                                             | Last PSA blood test                           | Last time the male participant had a PSA blood test for prostate cancer screening, if the male participant has ever had a PSA blood test.               | 1. Less than 6 months ago   2. 6 months to less than 1 year ago   3. 1 year to less than 2 years ago   4. 2 years to less than 3 years ago   5. 3 or more years ago   -7. Not Applicable                                                                                                |
| <b>Non pharmacological interventions-Radiological intervention</b>      |                                               |                                                                                                                                                         |                                                                                                                                                                                                                                                                                         |
| HS_MMG_EVER                                                             | Ever had mammography                          | Indicator of whether the female participant has ever had a mammography.                                                                                 | 0. Never had a mammography   1. Ever had a mammography   -7. Not Applicable                                                                                                                                                                                                             |
| HS_MMG_LAST                                                             | Last mammography                              | Last time the female participant had a mammography, if the female participant has ever had a mammography.                                               | 1. Less than 6 months ago   2. 6 months to less than 1 year ago   3. 1 year to less than 2 years ago   4. 2 years to less than 3 years ago   5. 3 or more years ago   -7. Not Applicable                                                                                                |
| <b>Health community care utilization-Visit health professionals</b>     |                                               |                                                                                                                                                         |                                                                                                                                                                                                                                                                                         |
| HS_DENTAL_VISIT_EVER                                                    | Ever had dental professional visit            | Indicator of whether the participant has ever had a dental professional visit.                                                                          | 0. Never had a dental professional visit   1. Ever had a dental professional visit                                                                                                                                                                                                      |
| HS_DENTAL_VISIT_LAST                                                    | Last visit with dental professional           | Last time the participant saw a dental professional, including a dentist or hygienist, if the participant has ever had dental professional visit.       | 1. Less than 6 months ago   2. 6 months to less than 1 year ago   3. 1 year to less than 2 years ago   4. 2 years to less than 3 years ago   5. 3 or more years ago   -7. Not Applicable                                                                                                |
| HS_ROUTINE_VISIT_EVER                                                   | Ever had routine medical check-up             | Indicator of whether the participant has ever had a routine medical check-up undertaken by a doctor or a nurse.                                         | 0. Never had routine medical check-up   1. Ever had routine medical check-up                                                                                                                                                                                                            |
| HS_ROUTINE_VISIT_LAST                                                   | Last routine medical check-up                 | Last time the participant had a routine medical check-up undertaken by a doctor or a nurse, if the participant has ever had a routine medical check-up. | 1. Less than 6 months ago   2. 6 months to less than 1 year ago   3. 1 year to less than 2 years ago   4. 2 years to less than 3 years ago   5. 3 or more years ago   -7. Not Applicable                                                                                                |
| <b>Reproduction-Gravidity, pregnancy outcomes, parity and fertility</b> |                                               |                                                                                                                                                         |                                                                                                                                                                                                                                                                                         |
| MH_CHILDREN_FATHERED                                                    | Number of children fathered                   | Number of children (live birth only) a male participant has fathered.                                                                                   | -7. Not Applicable                                                                                                                                                                                                                                                                      |
| MH_CHILDREN_FATHERED_CAT                                                | Number of children fathered - categorical     | Number of children (live birth only) a male participant has fathered.                                                                                   | 0. No children   1. 1 child   2. 2 children   3. 3 children   4. 4 children   5. 5 children   6. 6 children   7. 7 children   8. 8 children   9. 9 children   10. 10 children   11. 11 children   12. 12 children and more   -7. Not Applicable                                         |
| WH_GRAVIDITY                                                            | Gravidity                                     | Total number of times a female participant has been pregnant.                                                                                           | -7. Not Applicable                                                                                                                                                                                                                                                                      |
| WH_GRAVIDITY_CAT                                                        | Gravidity - categorical                       | Total number of times a female participant has been pregnant.                                                                                           | 0. No pregnancy   1. 1 pregnancy   2. 2 pregnancies   3. 3 pregnancies   4. 4 pregnancies   5. 5 pregnancies   6. 6 pregnancies   7. 7 pregnancies and more   -7. Not Applicable                                                                                                        |
| WH_LIVE_BIRTHS                                                          | Number of live births mothered                | Total number of live births the female participant has had.                                                                                             | -7. Not Applicable                                                                                                                                                                                                                                                                      |
| WH_LIVE_BIRTHS_CAT                                                      | Number of live births mothered - categorical  | Total number of live births the female participant has had.                                                                                             | 0. No live birth   1. 1 live birth   2. 2 live births   3. 3 live births   4. 4 live births   5. 5 live births   6. 6 live births   7. 7 live births   8. 8 live births   9. 9 live births   10. 10 live births   11. 11 live births   12. 12 live births and more   -7. Not Applicable |
| WH_PREG_20WK                                                            | Number of pregnancies of at least 20 weeks    | Total number of the female participant's pregnancies that lasted at least 20 weeks.                                                                     | -7. Not Applicable                                                                                                                                                                                                                                                                      |
| <b>Reproduction-Menstruation, menopause, andropause</b>                 |                                               |                                                                                                                                                         |                                                                                                                                                                                                                                                                                         |
| WH_HRT_AGE                                                              | Age started using hormone replacement therapy | Age of the female participant when she started using hormone replacement therapy.                                                                       | -7. Not Applicable                                                                                                                                                                                                                                                                      |



**Appendix 1 (as supplied by the authors): List of the Health and Risk Factor Questionnaire DataSchema variables (Version 2.0 - Oct. 2017)**

| Variable                                          | label                                                                 | Description                                                                                                                                                               | Categories                                                                                                                                           |
|---------------------------------------------------|-----------------------------------------------------------------------|---------------------------------------------------------------------------------------------------------------------------------------------------------------------------|------------------------------------------------------------------------------------------------------------------------------------------------------|
| WH_HRT_DURATION                                   | Duration of use of hormone replacement therapy                        | Total duration (in months) of hormone replacement therapy use during the lifetime of the female participant.                                                              | -7. Not Applicable                                                                                                                                   |
| WH_HFT_EVER                                       | Ever received hormone fertility treatment                             | Indicator of whether the female participant has ever received hormone fertility treatment during her life.                                                                | 0. Never had hormone fertility treatment   1. Ever had hormone fertility treatment   -7. Not Applicable                                              |
| WH_MENOPAUSE_AGE                                  | Age at menopause                                                      | Age of the female participant at menopause.                                                                                                                               | -7. Not Applicable                                                                                                                                   |
| WH_MENOPAUSE_EVER                                 | Occurrence of menopause                                               | Occurrence of menopause at any point during the life of the female participant.                                                                                           | 0. Never went through menopause   1. Ever went through menopause   -7. Not Applicable                                                                |
| WH_MENOPAUSE_REASON                               | Menopause reason                                                      | Reason for menopause onset (natural or induced).                                                                                                                          | 1. Went through menopause for natural reasons   2. Went through menopause for other reasons (surgery, chemotherapy, medication)   -7. Not Applicable |
| WH_MENSTRUATION_AGE                               | Age at menarche                                                       | Age of the female participant at menarche.                                                                                                                                | -7. Not Applicable                                                                                                                                   |
| <b>Reproduction-Pregnancy delivery</b>            |                                                                       |                                                                                                                                                                           |                                                                                                                                                      |
| WH_PREG_CUR                                       | Currently pregnant                                                    | Indicator of whether the female participant is currently pregnant.                                                                                                        | 0. Not currently pregnant   1. Currently pregnant   -7. Not Applicable                                                                               |
| WH_PREG_CUR_WK                                    | Number of weeks current pregnancy                                     | Total number of weeks of the female participant's current pregnancy.                                                                                                      | -7. Not Applicable                                                                                                                                   |
| WH_PREG_FIRST_AGE                                 | Age at first pregnancy                                                | Age of female participant when she first became pregnant.                                                                                                                 | -7. Not Applicable                                                                                                                                   |
| WH_PREG_LAST_AGE                                  | Age at last pregnancy                                                 | Age of the female participant when she last became pregnant.                                                                                                              | -7. Not Applicable                                                                                                                                   |
| <b>Reproduction-Contraception</b>                 |                                                                       |                                                                                                                                                                           |                                                                                                                                                      |
| WH_CONTRACEPTIVES_AGE                             | Age started using hormonal contraceptives                             | Age of the female participant when she started using hormonal contraceptives.                                                                                             | -7. Not Applicable                                                                                                                                   |
| WH_CONTRACEPTIVES_DURATION                        | Duration of use of hormonal contraceptives                            | Total duration (in months) of hormonal contraceptives use during the lifetime of the female participant.                                                                  | -7. Not Applicable                                                                                                                                   |
| WH_CONTRACEPTIVES_EVER                            | Ever used hormonal contraceptives                                     | Indicator of whether the female participant has ever used hormonal contraceptives.                                                                                        | 0. Never used hormonal contraceptives   1. Ever used hormonal contraceptives   -7. Not Applicable                                                    |
| <b>Reproduction-Breastfeeding</b>                 |                                                                       |                                                                                                                                                                           |                                                                                                                                                      |
| WH_BREASTFEEDING_DURATION                         | Duration of breastfeeding                                             | Total duration (in months) of breastfeeding during the lifetime of the female participant, including all different children breastfed.                                    | -7. Not Applicable                                                                                                                                   |
| <b>Reproduction-Reproductive sexual problems</b>  |                                                                       |                                                                                                                                                                           |                                                                                                                                                      |
| WH_HRT_EVER                                       | Ever used hormone replacement therapy                                 | Indicator of whether the female participant has ever used hormone replacement therapy.                                                                                    | 0. Never used hormone replacement therapy   1. Ever used hormone replacement therapy   -7. Not Applicable                                            |
| <b>Physical measures-Anthropometric measures</b>  |                                                                       |                                                                                                                                                                           |                                                                                                                                                      |
| PM_BMI_SR                                         | Body mass index - self-reported                                       | Weight (in kg) divided by height (in m) squared. Body mass index = (Weight) / (Standing height * 0.01) <sup>2</sup><br>Measure taken and reported by the participant.     | NA                                                                                                                                                   |
| PM_HIP_SR_AVG                                     | Average hip circumference - self-reported                             | Average of the two hip circumference measurements. Measure taken and reported by the participant.                                                                         | NA                                                                                                                                                   |
| PM_STAND_HEIGHT_SR_AVG                            | Average standing height - self reported                               | Average of the two vertical measurements or distance from the foot to the head of the participant when he/she is standing. Measure taken and reported by the participant. | NA                                                                                                                                                   |
| PM_WAIST_HIP_RATIO_SR                             | Waist to hip ratio - self-reported                                    | Ratio calculated using waist and hip circumference measurements. Measure taken and reported by the participant.                                                           | NA                                                                                                                                                   |
| PM_WAIST_SR_AVG                                   | Average waist circumference - self-reported                           | Average of the two waist circumference measurements. Measure taken and reported by the participant.                                                                       | NA                                                                                                                                                   |
| PM_WEIGHT_SR_AVG                                  | Average weight - self-reported                                        | Average of the two weight measurements. Measure taken and reported by the participant.                                                                                    | NA                                                                                                                                                   |
| <b>Physical measures-Physical characteristics</b> |                                                                       |                                                                                                                                                                           |                                                                                                                                                      |
| PM_HANDEDNESS                                     | Handedness                                                            | Dominant use or manifestations of one side of the body versus the other.                                                                                                  | 1. Right-handed   2. Left-handed   3. Ambidextrous                                                                                                   |
| UVE_EYE                                           | Natural eye colour                                                    | Natural eye color of the participant.                                                                                                                                     | 1. Amber   2. Blue   3. Brown   4. Grey   5. Green   6. Hazel   7. Red (Albino)                                                                      |
| UVE_HAIR                                          | Natural hair color                                                    | Natural hair color of the participant.                                                                                                                                    | 1. Blonde   2. Red   3. Light Brown   4. Dark Brown   5. Black                                                                                       |
| <b>Physical environment-Chemical exposure</b>     |                                                                       |                                                                                                                                                                           |                                                                                                                                                      |
| PSE_ADULT_HOME_DURATION                           | Duration of passive smoking exposure during adulthood at home         | Total duration of passive smoking exposure inside participant's home during adulthood.                                                                                    | NA                                                                                                                                                   |
| PSE_ADULT_WRK_DURATION                            | Duration of passive smoking exposure during adulthood at work         | Total duration of passive smoking exposure during adulthood at work.                                                                                                      | NA                                                                                                                                                   |
| PSE_CHILDHOOD_DURATION                            | Duration of passive smoking exposure during childhood                 | Total duration of passive smoking exposure inside participant's home during childhood.                                                                                    | NA                                                                                                                                                   |
| PSE_HOME_FREQ                                     | Frequency of usual passive smoking exposure at home                   | Indicator of the frequency at which the participant is usually exposed to other people's tobacco smoke at home.                                                           | 0. Never   1. Less than once a week   2. At least once a week   3. Almost every day   4. Every day                                                   |
| PSE_LEISURE_FREQ                                  | Frequency of usual passive smoking exposure during leisure activities | Indicator of the frequency at which the participant is usually exposed to other people's tobacco smoke during leisure activities outside home.                            | 0. Never   1. Less than once a week   2. At least once a week   3. Almost every day   4. Every day                                                   |

**Appendix 1 (as supplied by the authors): List of the Health and Risk Factor Questionnaire DataSchema variables (Version 2.0 - Oct. 2017)**

| Variable                                                                         | label                                               | Description                                                                                                                                               | Categories                                                                                                                                                                                                        |
|----------------------------------------------------------------------------------|-----------------------------------------------------|-----------------------------------------------------------------------------------------------------------------------------------------------------------|-------------------------------------------------------------------------------------------------------------------------------------------------------------------------------------------------------------------|
| PSE_WRK_FREQ                                                                     | Frequency of usual passive smoking exposure at work | Indicator of the frequency at which the participant is usually exposed to other people's tobacco smoke at work.                                           | 0. Never   1. Less than once a week   2. At least once a week   3. Almost every day   4. Every day                                                                                                                |
| <b>Physical environment-Radiation exposure</b>                                   |                                                     |                                                                                                                                                           |                                                                                                                                                                                                                   |
| UVE_PROTECTION                                                                   | Use of sun protection                               | Indicator of the frequency at which the participant uses sun protection during summer months when exposed to the sun for a minimum of 30 minutes.         | 0. Never   1. Rarely   2. Sometimes   3. Often   4. Always                                                                                                                                                        |
| UVE_SKIN_REACTION                                                                | Skin reaction to the sun                            | Reaction of the participant's skin when he is exposed to the sun during summer months, in the middle of the day for one hour, without any sun protection. | 0. Nothing would happen in an hour   1. Turning darker without a sunburn   2. Mildly burnt with some tanning   3. A severe sunburn for a few days with peeling   4. Get a severe sunburn with blisters   5. Other |
| UVE_TANNING_CUR                                                                  | Current use of artificial tanning equipment         | Indicator of the frequency at which the participant used artificial tanning equipment, for any reasons, in the past 12 months.                            | 0. Never   1. 1 to 4 times   2. 5 to 9 times   3. 10 to 14 times   4. 15 to 19 times   5. 20 to 24 times   6. 25 or more times                                                                                    |
| UVE_TIME_WKDAY                                                                   | Time spent in the sun on typical weekdays           | Time per day the participant typically spends in the sun between 11 am and 4 pm on weekdays, during summer months.                                        | 1. Less than 30 minutes   2. 30 to 59 minutes   3. 1 hour to less than 2 hours   4. 2 hours to less than 3 hours   5. 3 hours to less than 4 hours   6. 4 hours or more                                           |
| UVE_TIME_WKEND                                                                   | Time spent in the sun on typical weekend days       | Time per day the participant typically spends in the sun between 11 am and 4 pm on weekend days, during summer months                                     | 1. Less than 30 minutes   2. 30 to 59 minutes   3. 1 hour to less than 2 hours   4. 2 hours to less than 3 hours   5. 3 hours to less than 4 hours   6. 4 hours or more                                           |
| <b>Administrative information-Physical measure biosample related information</b> |                                                     |                                                                                                                                                           |                                                                                                                                                                                                                   |
| PM_ABLE_STAND                                                                    | Able to stand                                       | Indicator of whether the participant is able to stand.                                                                                                    | 0. Not able to stand without assistance   1. Able to stand without assistance                                                                                                                                     |
| <b>Administrative information-Questionnaire interview related information</b>    |                                                     |                                                                                                                                                           |                                                                                                                                                                                                                   |
| ADM_QX_FORMAT                                                                    | Questionnaire administration format                 | Format of the questionnaire administered to the participant.                                                                                              | 1. Paper questionnaire   2. Teleform questionnaire   3. Computerized questionnaire   4. Online questionnaire                                                                                                      |
| ADM_QX_LANGUAGE                                                                  | Questionnaire administration language               | Language of the questionnaire administered to the participant.                                                                                            | 1. English   2. French                                                                                                                                                                                            |
| ADM_QX_VERSION                                                                   | Questionnaire version                               | Version of the questionnaire administered to the participant.                                                                                             | NA                                                                                                                                                                                                                |
| ADM_STUDY_DATASET                                                                | Regional cohort dataset name                        | Name of the regional cohort dataset.                                                                                                                      | NA                                                                                                                                                                                                                |
| PA_IPAQ_VERSION                                                                  | IPAQ version                                        | Version of the IPAQ (short or long form) administered to the participant.                                                                                 | 1. IPAQ short   2. IPAQ long                                                                                                                                                                                      |
| <b>Administrative information-Identifiers</b>                                    |                                                     |                                                                                                                                                           |                                                                                                                                                                                                                   |
| ADM_FSA                                                                          | Forward Sortation Area (FSA)                        | Forward sortation area of the participant's residence at questionnaire completion.                                                                        | NA                                                                                                                                                                                                                |
| ADM_STUDY_ID                                                                     | Regional cohort ID                                  | Identification number of the regional cohort.                                                                                                             | NA                                                                                                                                                                                                                |
| <b>Administrative information-Date and time related information</b>              |                                                     |                                                                                                                                                           |                                                                                                                                                                                                                   |
| ADM_QX_COMPLETION                                                                | Date of questionnaire completion                    | Date on which the questionnaire is completed (yyyy-MM-dd).                                                                                                | NA                                                                                                                                                                                                                |
